# Supplementary material for: Effect of Methionine on Gene Expression in Komagataella phaffii Cells
Source: MDPI journal article supplement (doi:10.3390/microorganisms11040877), 2023-03-29
Supplement: s1 [file s1]

Table S2. *Number of reads for each sample analyzed by RNA-sequencing*

| <b>Sample</b> | <b>Medium</b>    | <b>Reads</b> |
|---------------|------------------|--------------|
| Met_neg_1     | BMM              | 803313       |
| Met_neg_2     | BMM              | 726389       |
| Met_neg_3     | BMM              | 596414       |
| Met_pos_1     | BMM + Methionine | 696835       |
| Met_pos_2     | BMM + Methionine | 536542       |
| Met_pos_3     | BMM + Methionine | 756652       |
