# Supplementary material for: Effect of Methionine on Gene Expression in Komagataella phaffii Cells
Source: Microorganisms. 2023 Mar 29;11(4):877. doi: 10.3390/microorganisms11040877 (PMC10143545; doi:10.3390/microorganisms11040877)
Supplement: Supplementary file 1 [file microorganisms-11-00877-s001.zip]

Archive with 6 entries (6 files):
- Figure S1. Analysis of pPICZ-PHO1 plasmid and PAP1-X33 K. phaffii strain generated in this study.pdf
- Table S1. Growth curves of K. phaffii X-33 strain in different media.xlsx
- Table S2. Number of reads for each sample analyzed by RNA-sequencing.pdf
- Table S3. The results of the differential gene expression analysis using DESeq2.xlsx
- Table S4. Differentially expressed genes discussed in this paper.xlsx
- Table S5. Analysis of ACP specific activity of K. phaffii PAP1-X33 strain carrying reporter gene PHO1 under control of AOX1 promoter.xlsx
