# Supplementary material for: Effect of Methionine on Gene Expression in Komagataella phaffii Cells
Source: Microorganisms. 2023 Mar 29;11(4):877. doi: 10.3390/microorganisms11040877 (PMC10143545; doi:10.3390/microorganisms11040877)
Supplement: Supplementary file 1 [file microorganisms-11-00877-s001.zip › Table S1. Growth curves of K. phaffii X-33 strain in different media.xlsx]

## Sheet: Лист1
	K. phaffii wild type X-33 strain was grown in 100 ml volumes of BMG, BMG+Met, BMM, BMM+Met and BM+Met media.
	For each measurement 200 ul of yeast culture was added to 1,8 ml of water (x 10 dilution).
	Optical densities of yeast cultures were measured using spectrophotometer at 600 nm.
	Four separate cultures were cultivated for each media type.
		For each culture two measurements were taken each time.
		Time (h)
Media	Probe #	0	16			25			41			66
		Measurement	Measurement 1	Measurement 2	(Mean (measurments 1+2))*10	Measurement 1	Measurement 2	(Mean (measurments 1+2))*10	Measurement 1	Measurement 2	(Mean (measurments 1+2))*10	Measurement 1	Measurement 2	(Mean (measurments 1+2))*10
BMG (Glycerol)	1	0.003	0.089	0.086	0.875	0.293	0.296	2.945	0.633	0.635	6.34	0.982	0.993	9.875
	2	0.002	0.07	0.07	0.7	0.225	0.241	2.33	0.539	0.555	5.47	0.878	0.851	8.645
	3	0.003	0.074	0.077	0.755	0.243	0.232	2.375	0.501	0.518	5.095	0.862	0.845	8.535
	4	0.003	0.066	0.067	0.665	0.252	0.242	2.47	0.534	0.556	5.45	0.867	0.791	8.29
BMG+M (Glycerol + L-Methionine)	1	0.004	0.101	0.108	1.045	0.292	0.303	2.975	0.582	0.582	5.82	0.828	0.83	8.29
	2	0.002	0.107	0.102	1.045	0.287	0.305	2.96	0.576	0.608	5.92	0.819	0.872	8.455
	3	0.003	0.106	0.106	1.06	0.261	0.268	2.645	0.601	0.601	6.01	0.855	0.901	8.78
	4	0.004	0.109	0.101	1.05	0.277	0.306	2.915	0.595	0.599	5.97	0.863	0.887	8.75
BMM (Methanol)	1	0.004	0.02	0.021	0.205	0.072	0.073	0.725	0.183	0.186	1.845	0.253	0.264	2.585
	2	0.003	0.017	0.018	0.175	0.063	0.064	0.635	0.165	0.164	1.645	0.279	0.256	2.675
	3	0.002	0.019	0.02	0.195	0.075	0.08	0.775	0.192	0.166	1.79	0.245	0.264	2.545
	4	0.003	0.017	0.018	0.175	0.061	0.064	0.625	0.161	0.156	1.585	0.241	0.231	2.36
BMM+M (Methanol + L-Methionine)	1	0.003	0.013	0.013	0.13	0.041	0.034	0.375	0.125	0.123	1.24	0.213	0.206	2.095
	2	0.003	0.011	0.011	0.11	0.031	0.033	0.32	0.132	0.129	1.305	0.229	0.228	2.285
	3	0.002	0.01	0.01	0.1	0.036	0.04	0.38	0.119	0.119	1.19	0.206	0.206	2.06
	4	0.005	0.012	0.012	0.12	0.047	0.049	0.48	0.138	0.137	1.375	0.224	0.221	2.225
BM+M (Without carbon source + L- Methionine)	1	0.004	0.003	0.003	0.03	0.004	0.005	0.045	0.004	0.005	0.045	0.01	0.007	0.085
	2	0.002	0.003	0.004	0.035	0.005	0.004	0.045	0.004	0.004	0.04	0.009	0.013	0.11
	3	0.003	0.006	0.007	0.065	0.006	0.007	0.065	0.004	0.003	0.035	0.012	0.009	0.105
	4	0.003	0.003	0.003	0.03	0.004	0.005	0.045	0.003	0.003	0.03	0.007	0.011	0.09
	Time (h)
Media	0	16	25	41	66
BMG (Glycerol)	0.00275	0.74875	2.53	5.58875	8.83625
BMG+M (Glycerol + Methionine)	0.00325	1.05	2.87375	5.93	8.56875
BMM (Methanol)	0.003	0.1875	0.69	1.71625	2.54125
BMM+M (Methanol + Methionine)	0.00325	0.115	0.38875	1.2775	2.16625
BM+M (Without carbon source + Methionine)	0.003	0.04	0.05	0.0375	0.0975
