# Supplementary material for: Effect of Methionine on Gene Expression in Komagataella phaffii Cells
Source: Microorganisms. 2023 Mar 29;11(4):877. doi: 10.3390/microorganisms11040877 (PMC10143545; doi:10.3390/microorganisms11040877)
Supplement: Supplementary file 1 [file microorganisms-11-00877-s001.zip › Table S3. The results of the differential gene expression analysis using DESeq2.xlsx]

## Sheet: Восстановл_Лист1
	Table S3. The results of the differential gene expression analysis using DESeq2
	Gene - the name of the gene as in NCBI database (reference genome of K. phaffii (ASM2700v1))
	baseMean - the average of the normalized count values
	log2FoldChange - the logarithmic value of the expression level change. This value indicates the change between the experimental groups (grown in media with proline) and the control group (grown in media with ammonium sulphate).
	lfcSE - the standard error of the log2FoldChange value
	stat - statistical value of the Wald test (commonly used for hypothesis testing when comparing two groups in DESeq2)
	P value of the Wald test
	P adj value is obtained as the result of Benjamini and Hochberg adjustment method
	Gene name - gene name used in the text of this paper
		genes, discussed in the paper, that are repressed in media with proline in comparison with media with ammonium sulphate (log2FoldChange less than -0.5, P adj value less than 0,05)
		genes, discussed in the paper, that are repressed in media with proline in comparison with media with ammonium sulphate (log2FoldChange less than -0.5, 0,05<P adj value<0,1)
		genes, discussed in the paper, that are activated in media with proline in comparison with media with ammonium sulphate (log2FoldChange greater than 0.5, P adj value less than 0,05)
		genes that does not significantly change expression in media with proline in comparison with media with ammonium sulphate
	X	baseMean	log2FoldChange	lfcSE	stat	pvalue	padj
3911	PAS_chr4_0147	346.006914358366	1.93010228707304	0.245550196064475	7.86031661960576	3.83163692008194e-15	1.02639973996695e-12
1852	PAS_chr2-1_0429	98.1881978697475	2.43007748727333	0.276611211054869	8.78517352209307	1.56123346780822e-18	1.115241107171e-15
2729	PAS_chr3_0069	39.1466280324773	2.0672785926053	0.392847113596697	5.26229803161442	1.42265906490144e-07	1.21950335043351e-05
2210	PAS_chr2-1_0785	176.879937034255	-1.18801489850943	0.226937137112077	-5.23499553060241	1.6498885603478e-07	1.30952266104642e-05	KpFAA1
2438	PAS_chr2-2_0236	144.017725645115	-1.18438513758329	0.226189343876331	-5.23625524211632	1.63867299934756e-07	1.30952266104642e-05
4018	PAS_chr4_0252	1084.84368178011	1.06746113564765	0.187338599156865	5.69803094744948	1.2119905449355e-08	1.36699775673514e-06
1083	PAS_chr1-4_0370	226.185536385855	1.21157310572565	0.23226112407049	5.2164265999072	1.82407808880596e-07	1.39607119439685e-05
2754	PAS_chr3_0095	302.202817047503	-1.52859594092642	0.269396261211511	-5.67415425162963	1.39375504608464e-08	1.49340853187969e-06
4136	PAS_chr4_0369	70.3536641917978	-2.31058793377261	0.308715601919449	-7.48451947166406	7.18093875648226e-14	1.70986130612683e-11	KpMET10
2419	PAS_chr2-2_0482	52.1203975511978	-2.54961256290761	0.341827916939259	-7.45876049486228	8.73402033350657e-14	1.87170055747046e-11
3833	PAS_chr4_0064	240.412651924146	-1.24270549479868	0.241386658898359	-5.14819460391949	2.63005557720653e-07	1.943520379984e-05
4346	PAS_chr4_0579	548.977942532482	1.45827136999408	0.225942409318987	6.45417287701525	1.08811542087358e-10	2.11984667902917e-08
1005	PAS_chr1-4_0295	210.65820607221	-1.34599626579622	0.241536927615087	-5.57263139465449	2.50920109908778e-08	2.56057997873577e-06	KpFAS2
993	PAS_chr1-4_0699	107.507228909485	-1.75263795852901	0.273999750457055	-6.39649472528883	1.58984322330692e-10	2.62079540580517e-08
4087	PAS_chr4_0314	108.690607285834	1.68108687950855	0.262365303273522	6.40742833954676	1.47994607386791e-10	2.62079540580517e-08
679	PAS_chr1-1_0417	489.710175352641	-2.05382072922614	0.237897964244363	-8.63320010219386	5.9658935623915e-18	3.19622747605125e-15
4357	PAS_chr4_0589	238.184870595175	-1.39696593755376	0.220872280944925	-6.32476801333932	2.53613307140482e-10	3.8820951228718e-08
1851	PAS_chr2-1_0428	143.365131205385	1.2630014591582	0.252909903889294	4.99387900487696	5.91784807904958e-07	4.22731614446775e-05
3916	PAS_chr4_0152	518.304416326751	-3.08025114470705	0.212952144458743	-14.4645227806279	2.03008089561512e-47	4.3504633593032e-44	AOX2
3834	PAS_chr4_0065	1874.08983363097	-1.12991290456782	0.227671195185659	-4.9629155047322	6.94427976252999e-07	4.66315821412112e-05
4591	PAS_chr4_0832	94.3628287514708	1.70817355219463	0.344224127725081	4.96238762658403	6.96318538739504e-07	4.66315821412112e-05
389	PAS_chr1-1_0475	1016.84939773258	1.07590282983331	0.197374770399792	5.4510656435674	5.00688831730862e-08	4.82460219934509e-06
2164	PAS_chr2-1_0746	94.5760429161259	-1.42418326299163	0.26155390151079	-5.44508514216476	5.17806115655329e-08	4.82460219934509e-06
2066	PAS_chr2-1_0641	167.044072213178	1.45897960595696	0.295246486353459	4.94156467017295	7.74981018017489e-07	4.88465976944552e-05
4336	PAS_chr4_0567	102.563555280994	1.25407166790767	0.253567015709559	4.94572081624414	7.58626200408848e-07	4.88465976944552e-05
2075	PAS_chr2-1_0874	148.453658872203	1.33254665377096	0.271362450614755	4.91057864030986	9.08080288014812e-07	5.56004587775926e-05
3953	PAS_chr4_0191	64.7859825355816	1.64937221221602	0.30548920093291	5.39911789738926	6.69693553354468e-08	5.97980535349427e-06
1664	PAS_chr2-1_0235	219.394121664459	2.66543164186674	0.247998873116123	10.747757069923	6.07201754248047e-27	6.50616679676783e-24
935	PAS_chr1-4_0226	97.7191819383836	2.27438255637806	0.286780615593102	7.93074019899959	2.17843523257415e-15	6.66912386200914e-13
4380	PAS_chr4_0613	53.0426907144652	1.78129852287442	0.306454863920866	5.81259667438137	6.15111390233942e-09	7.32324282928521e-07
138	PAS_chr1-3_0153	113.396667687962	-1.62511847060907	0.262291204123528	-6.19585577045774	5.79691922097595e-10	7.76424868159466e-08
1257	PAS_chr1-4_0547	1169.0495851021	-1.22588308301274	0.197584505331551	-6.2043482658505	5.49240358058463e-10	7.76424868159466e-08	PMP20
2726	PAS_chr3_0066	232.441090540337	-1.81624292651827	0.221353165560861	-8.20518162419905	2.30242550641801e-16	8.80736418548497e-14
3707	PAS_chr3_1084	284.340486323361	-1.85189012623835	0.225924652600515	-8.19693692088093	2.46589757876387e-16	8.80736418548497e-14	KpMET5
492	PAS_chr1-1_0226	536.194946585063	1.06953802787264	0.222261483904624	4.81207094042255	1.49374309349664e-06	8.89192069267584e-05
2067	PAS_chr2-1_0642	472.415588427053	1.14208196550029	0.237611802553516	4.80650352056086	1.5359277969782e-06	8.8959277538494e-05
4446	PAS_chr4_0684	322.263821721115	1.12031077425861	0.233466502362209	4.79859321540065	1.59783940419674e-06	9.01097327156212e-05
2192	PAS_chr2-1_0887	270.150848229714	-1.42710323002497	0.231799309303169	-6.15663279720333	7.4307868837299e-10	9.36716252460776e-08
3846	PAS_chr4_0077	21.5314526341991	2.3112201484686	0.486696766208868	4.74878879198621	2.04638515597914e-06	0.000112446240750341
3059	PAS_chr3_0403	28.8761513437193	1.91358668184563	0.403723079336888	4.73984961421744	2.13876899674753e-06	0.000114584549000749
3254	PAS_chr3_0613	84.9671094941278	1.44631855098263	0.305478622988951	4.73459824072516	2.19489438324979e-06	0.000114723382031812
4283	PAS_chr4_0516	688.76449247831	-1.03828596243842	0.220080617057776	-4.71775286855836	2.38463913358457e-06	0.000121673372935041
1927	PAS_chr2-1_0503	131.669278957474	-1.55101522396535	0.332822338531868	-4.66018966998165	3.15918135009716e-06	0.000153866491664959
2842	PAS_chr3_0188	331.684464059934	-0.933455079250804	0.200241059362292	-4.66165671627776	3.136740799547e-06	0.000153866491664959
216	PAS_chr1-3_0237	97.8875100185827	-1.52086893094641	0.330141744097804	-4.60671501903697	4.09080030811773e-06	0.000194813001339918
4392	PAS_chr4_0627	3216.26921530552	1.01578862579676	0.225250861734892	4.5095881896882	6.49535890480032e-06	0.000302599002891024
1199	PAS_chr1-4_0489	124.869980808471	-1.27270703809759	0.285108642556134	-4.46393706864572	8.04672073888958e-06	0.000366896224328518	KpCYS3
272	PAS_chr1-1_0008	123.954660363073	-1.09663922564408	0.246763071513625	-4.44409780976294	8.82614474777363e-06	0.000394050587384977	KpFAS1
375	PAS_chr1-1_0107	705.671252233642	-0.907834337084557	0.206712071800169	-4.39178190793894	1.12425442547348e-05	0.000491689231385648
3098	PAS_chr3_0448	175.955584767517	-0.956824653541199	0.220146465775082	-4.34630939984638	1.38447245790626e-05	0.000593384895458622
785	PAS_chr1-4_0074	132.122865436015	1.17684539167276	0.272254081340488	4.32259963148527	1.5420141065422e-05	0.000643948673829625
2499	PAS_chr2-2_0470	704.326998297719	-0.810237218506144	0.18769183224216	-4.31684857474658	1.58272655500279e-05	0.000643948673829625
4014	PAS_chr4_0248	330.541058098682	0.932903062243883	0.216176167388891	4.31547600048638	1.59259354703547e-05	0.000643948673829625
1103	PAS_chr1-4_0393	107.921480670334	-1.09437108348395	0.260270058027984	-4.20475214004942	2.61368423002339e-05	0.00103724542684076
4318	PAS_chr4_0548	264.522606299154	0.82882465103973	0.199489322624998	4.15473189308362	3.25669182909928e-05	0.0012689255617745
2382	PAS_chr2-2_0288	150.484681655823	0.961569169101403	0.234517024867497	4.10021050558991	4.1277449882312e-05	0.00157959955531776
1480	PAS_chr2-1_0050	59.5764492830046	-1.2046233203943	0.297273866298942	-4.0522341751458	5.07308493439307e-05	0.00190730193235164
1074	PAS_chr1-4_0361	68.8421929217589	-1.13750221989344	0.283619233515687	-4.01066671605163	6.05475291629437e-05	0.00223712681027911
3313	PAS_chr3_0675	85.3136809991617	1.08698972545333	0.273153261279546	3.97941331676397	6.90855435469595e-05	0.00250932745459549
2211	PAS_chr2-1_0786	159.884209509277	-0.901643450207557	0.22749375075913	-3.96337678375269	7.38970119431753e-05	0.00263935494323708
1743	PAS_chr2-1_0313	282.63322660303	-0.790098900747961	0.200156324304543	-3.94740912380966	7.90014900627417e-05	0.00277541300335173
3400	PAS_chr3_0771	183.999553155964	-0.906218679326236	0.230831403737319	-3.92588991209139	8.64096717018238e-05	0.00298670849124207
2895	PAS_chr3_0236	69.0409294362285	1.1461708542147	0.292631259596134	3.91677517909929	8.97413672245324e-05	0.00305263095178052	KpELO
366	PAS_chr1-1_0098	45.5162890048722	1.22227758032875	0.312891392871432	3.90639566372151	9.36830670308215e-05	0.00313691894761016
1292	PAS_chr1-4_0691	93.5045401060143	1.01283758108771	0.260325328132238	3.89066092168033	9.99715515261883e-05	0.00324604598364578
1388	PAS_FragB_0015	71.4451288881439	1.09334301371555	0.280829442578092	3.89326348291105	9.89046282369444e-05	0.00324604598364578
693	PAS_chr1-1_0432	582.945707081965	0.726709144481642	0.189495113912873	3.83497563328083	0.000125576743153395	0.00401658150116007
657	PAS_chr1-1_0395	59.7460685564816	-1.16383700455534	0.304079053120201	-3.82741590587393	0.00012949560441242	0.00408101588611495
1224	PAS_chr1-4_0516	260.468654941071	-0.864038799319276	0.228720515500432	-3.77770571839081	0.000158279749384592	0.00491584786856785
1928	PAS_chr2-1_0504	88.1492149524756	-1.03591807123826	0.275956343846464	-3.75392011938896	0.000174090363071414	0.00525553746612687
2617	PAS_chr2-2_0064	93.8220722702325	1.18577774312576	0.31588100568476	3.75387478761267	0.000174121866586565	0.00525553746612687
3304	PAS_chr3_0667	54.1913560605579	-1.18219146208504	0.315352886084562	-3.74878910024636	0.000177690427942563	0.00528875815390156	KpMET14
3721	PAS_chr3_1099	100.959387245584	0.925519422498771	0.248181065422046	3.72921044933413	0.000192080683860326	0.00563875213031066
348	PAS_chr1-1_0471	25.2131852439881	1.59000799923959	0.426979296453099	3.72385268430513	0.000196205442459746	0.00568200355663833
2469	PAS_chr2-2_0206	640.95535748184	0.803135449219292	0.216876457924735	3.70319331523762	0.000212902520873386	0.00608333469642222
467	PAS_chr1-1_0483	50.4433678889653	1.1722366660152	0.319076076301442	3.67384693833249	0.00023892588923759	0.00664958676150851
4234	PAS_chr4_0470	37.5152965564167	-1.2555369418789	0.34159785671406	-3.67548249264885	0.000237400321370506	0.00664958676150851
1248	PAS_chr1-4_0538	101.808739512696	0.889410491773751	0.243355286051524	3.65478188785036	0.000257400712599347	0.00689512158875502	KpPOX1
3553	PAS_chr3_0932	2743.01995857197	-0.70481748283804	0.192806719575753	-3.655564932534	0.000256616243114036	0.00689512158875502	FDH1
3921	PAS_chr4_0157	116.215497399519	0.885862954073654	0.242007707247476	3.66047414005611	0.000251748962317371	0.00689512158875502
2032	PAS_chr2-1_0611	992.339719089231	-0.792692637701233	0.218954632137569	-3.62035107438688	0.000294203550612793	0.00778368159213847
1052	PAS_chr1-4_0339	598.888792300466	0.664376129500015	0.184040127998546	3.60995255070277	0.000306253022487606	0.00800366130720658
3975	PAS_chr4_0212	69.2894910901862	-1.11566108537799	0.312734103509167	-3.5674429902567	0.000360481774226332	0.00930737882128951
970	PAS_chr1-4_0264	100.963849408691	-0.949698118809726	0.266697460239803	-3.56095674085459	0.000369505962524481	0.00942680092488052
1015	PAS_chr1-4_0303	99.711049828113	-0.869443159897254	0.244609575095887	-3.55441179911469	0.000378825551699106	0.00955086067401393
491	PAS_chr1-1_0225	24.1274964760804	1.48036179682225	0.419816365997885	3.52621268897771	0.000421548280085497	0.0105043949328281
3457	PAS_chr3_0834	4730.14956812628	-0.638806498723377	0.181747449097169	-3.51480310671016	0.000440080138918047	0.0107169515647884	DAS2
4601	PAS_chr4_0842	114.856872150333	-0.841307518888963	0.239252300925681	-3.51640304245307	0.00043743639485892	0.0107169515647884
2282	PAS_chr2-2_0391	143.516558932715	0.825026975320109	0.235328525192909	3.50585197711922	0.000455148266169794	0.0109593565663131
957	PAS_chr1-4_0249	137.397778437913	-0.855344405480135	0.245117925304194	-3.48952205114597	0.000483885133976159	0.0113952290341858	KpACC1
1410	PAS_FragB_0039	48.8204947956076	1.09441259578458	0.31339938668247	3.49206999850776	0.000479292624564506	0.0113952290341858
1964	PAS_chr2-1_0539	442.840212646611	0.7330420205202	0.21392068830881	3.42669999014775	0.000610963675989126	0.0142314691048337
4356	PAS_chr4_0588	89.8090127701131	0.891934876752804	0.262729017512949	3.39488528977902	0.000686573601303493	0.0158207228773482
4078	PAS_chr4_0307	22.1210544419296	1.47320310584435	0.43557640027222	3.38219220537119	0.000719098118531963	0.0163939071065319
1051	PAS_chr1-4_0338	135.745879490681	0.878409991723252	0.260774212076439	3.36846954585282	0.000755867469932711	0.0170507788217453
561	PAS_chr1-1_0293	66.8357523555211	0.950491486210991	0.283772088867284	3.34948898605571	0.000809607744058081	0.0180728062032965
1002	PAS_chr1-4_0292	174.042157317677	-0.729435068825898	0.219022638273048	-3.33040947080792	0.000867183569767385	0.019158498866098
3434	PAS_chr3_0807	49.1893246900919	1.12761333278665	0.339248071085701	3.3238607051705	0.000887805282833629	0.0194139461338007
853	PAS_chr1-4_0145	1203.62967317094	-0.68548510475437	0.206433065390246	-3.32061679876	0.000898187676454899	0.0194425877842712
2694	PAS_chr3_0030	21.9236925628126	-1.64791213592979	0.497251035776875	-3.3140446522252	0.000919568209931128	0.0195112343948753
4236	PAS_chr4_0472	42.4052540174082	1.10032491259762	0.331897784000846	3.31525236274195	0.000915604249630136	0.0195112343948753
2450	PAS_chr2-2_0223	22.3718149791201	1.4051173782193	0.425242719068577	3.30427145536314	0.000952235805949102	0.0200062875700875
1281	PAS_chr1-4_0573	96.7899907927299	-0.856592482961709	0.260335588408913	-3.29033955056596	0.00100066551719842	0.0206194827245789
3484	PAS_chr3_0859	67.3776100382357	-0.923568780160878	0.280600871903247	-3.29139668703286	0.000996912268807112	0.0206194827245789
3225	PAS_chr3_0579	496.425899836213	0.69456016285687	0.212615673199602	3.26674018149557	0.00108793477756236	0.0220886316582599
4548	PAS_chr4_0994	115.498061198693	0.771949657044527	0.236393071297617	3.26553419187421	0.0010925781408192	0.0220886316582599
2599	PAS_chr2-2_0079	35.073876249483	-1.20911371158618	0.37122870501662	-3.25705877602338	0.00112573120376582	0.0225461866324312
893	PAS_chr1-4_0183	126.113711738898	0.790786215326532	0.243063362838519	3.25341592452128	0.00114026462462282	0.0226258063941361
694	PAS_chr1-1_0433	102.623175307176	-0.819233586463764	0.25406178776889	-3.22454468126859	0.00126173165596716	0.0248063388875012
2704	PAS_chr3_0044	160.421871742922	-0.722469104063225	0.225629861809619	-3.20201013407006	0.00136472196879288	0.0265872652647559
4464	PAS_chr4_0703	62.0544470253967	0.949805974523047	0.296950805473318	3.19852971272169	0.00138130298042599	0.0266678584419179
3481	PAS_chr3_0857	21.1360543276309	-1.43230949434384	0.448995397788427	-3.19003157136762	0.00142257251992316	0.0269785213291622
3691	PAS_chr3_1071	248.300278112382	0.87084914980544	0.272903132244533	3.19105589827061	0.00141753851747704	0.0269785213291622
1745	PAS_chr2-1_0315	88.3087364543107	-0.820562179660432	0.257927161960697	-3.1813717230195	0.0014657942003566	0.0275543593979316
3959	PAS_chr4_0196	33.806784633752	-1.14076364113334	0.359219375752062	-3.17567402578171	0.0014948882742693	0.0278569180152967
4317	PAS_chr4_0547	37.8376156369753	1.105164817293	0.349627480276009	3.16097812569121	0.00157240306339513	0.0290487910763428
3954	PAS_chr4_0192	204.75293432653	0.800400411580752	0.254079826696552	3.15019268545343	0.00163162812649303	0.0298852912399536
365	PAS_chr1-1_0097	21.493335790646	1.49603107470811	0.476516818951648	3.13951368600047	0.00169228509549296	0.0307336183020459
152	PAS_chr1-3_0165	39.5686368334018	-1.14881652195064	0.366751719803456	-3.13240936556835	0.00173377948682053	0.030960918752651
2880	PAS_chr3_0225	96.4020805811941	-0.862322576857711	0.275503608525212	-3.1299865053448	0.00174814333601062	0.030960918752651
3903	PAS_chr4_0138	71.1621368651291	0.836291767298469	0.267164262888503	3.13025311939825	0.00174655738255866	0.030960918752651
2393	PAS_chr2-2_0279	145.873040243132	0.75504810573187	0.241691474441702	3.12401630002052	0.0017840057361349	0.0310823113214397
3642	PAS_chr3_1023	102.637695979793	0.755864593344105	0.241903380578345	3.12465494089821	0.00178013743838923	0.0310823113214397
2887	PAS_chr3_1167	141.745503949486	0.783197118159518	0.251372169586291	3.11568746631143	0.00183516659264301	0.0317158226454352
4256	PAS_chr4_0488	55.3569044037431	0.983293106274179	0.316704559595496	3.10476460310539	0.0019043051234197	0.0326474070359074
760	PAS_chr1-4_0047	74.6303608312598	-0.819078777086542	0.264409275389377	-3.09776869922714	0.00194983546251925	0.0331626777474505
3945	PAS_chr4_0181	66.1655167105763	0.894371731849441	0.290370633724128	3.08010393605834	0.0020692836935284	0.034917125631743
1123	PAS_chr1-4_0411	30.2012771314995	1.11710043231024	0.366519464435681	3.04786113891715	0.0023047640264046	0.0385867914733208
468	PAS_chr1-1_0202	100.346417144414	0.88103966782225	0.290383285118685	3.03405778835429	0.00241288205928186	0.0397626678715921
1234	PAS_chr1-4_0526	311.534831038085	0.60534088150187	0.199643628958753	3.0321071834801	0.00242852954206386	0.0397626678715921
2031	PAS_chr2-1_0867	745.197770745431	-0.671936726774793	0.221794537848626	-3.0295458729168	0.00244921705975276	0.0397626678715921
2662	PAS_chr2-2_0022	276.01724859969	0.667758247056963	0.220269853429071	3.03154624503343	0.00243304647550278	0.0397626678715921
3325	PAS_chr3_0688	89.0767834654766	0.845022329136276	0.280057555501656	3.01731666415006	0.00255023252130675	0.041091340550078
3455	PAS_chr3_0832	2681.46520726312	-0.582951342313111	0.193912933113072	-3.00625302786373	0.00264488810124495	0.0422984716490144	DAS1
4101	PAS_chr4_0330	46.9169921595488	-0.924148269076688	0.307717080210814	-3.00324008158261	0.00267121613950794	0.0424030828664112	KpMET25 (KpMET17)
522	PAS_chr1-1_0256	23.5232779165537	-1.30573712246708	0.435442844530414	-2.99864181687312	0.00271185914213932	0.0424198112525881
837	PAS_chr1-4_0129	83.8704773548316	0.939242977492954	0.313076369653611	3.00004429760105	0.00269940344884298	0.0424198112525881
2728	PAS_chr3_0068	71.4511291404269	-0.906584367288042	0.302961565255917	-2.99240719370536	0.00276786808925308	0.0429821834439807
2678	PAS_chr3_0006	590.268764872424	-0.782067167419222	0.262473625441705	-2.97960286906205	0.00288622301510366	0.0444976684990442
2092	PAS_chr2-1_0667	175.517717438096	0.758323801328908	0.256498544555815	2.95644485095272	0.00311207879961619	0.0476370347684106
2919	PAS_chr3_0260	51.4269768771794	-0.877508523931085	0.297921875033642	-2.94543166335803	0.0032250437964922	0.0490160911764737
1182	PAS_chr1-4_0472	89.4201250262218	0.850830424601024	0.289550372317168	2.93845391319006	0.00329853695428545	0.0497800330495332
1000	PAS_chr1-4_0290	30.9724100730954	1.0500435950699	0.358089384358595	2.93235052737105	0.00336406815135306	0.0504139723660811
244	PAS_chr1-3_0266	39.6586619974539	1.03951556170933	0.356804867942578	2.91340072713531	0.0035751549060812	0.0532052566925834
2526	PAS_chr2-2_0157	43.9071305161123	0.922584686956318	0.317779531093048	2.90322250707262	0.00369344121565004	0.0545865139664692
2083	PAS_chr2-1_0659	47.0388752612096	0.917242121554494	0.316280699359065	2.90008882430468	0.00373056927784691	0.0547576024823693
3827	PAS_chr4_0058	52.6809677445867	-0.933933216931512	0.322738244221097	-2.89377919615782	0.00380635725011106	0.0554899563740681
1666	PAS_chr2-1_0237	121.145889215059	-0.732411398448094	0.253415577560022	-2.89015934024269	0.00385046603846866	0.0557537075705293
915	PAS_chr1-4_0205	37.6970047847703	0.999323453820688	0.346062383390956	2.88769742619418	0.0038807298087168	0.0558147918126182
1085	PAS_chr1-4_0371	147.04412915187	0.651607409151213	0.226124290604293	2.88163384574856	0.00395619169299312	0.0561464821065183
4020	PAS_chr4_0254	108.600670176699	0.705442200725013	0.244669074899025	2.88325036997892	0.00393594469010711	0.0561464821065183
3573	PAS_chr3_0951	232.068424933154	-0.657650541466332	0.228522987415307	-2.87783101780981	0.00400419567019164	0.0564538902711887	TPI1
452	PAS_chr1-1_0187	144.679987168797	-0.674191753738766	0.234523302510458	-2.87473247443589	0.00404369961817939	0.0565075958802128
2615	PAS_chr2-2_0065	306.895361408952	0.635807718064369	0.221430936078002	2.87135903106329	0.00408711029464908	0.0565075958802128
4553	PAS_chr4_0794	168.29279217453	-0.646821978788466	0.22514249344779	-2.87294490206249	0.00406665033048147	0.0565075958802128	PEX14
786	PAS_chr1-4_0075	77.7476026111908	0.930287579609756	0.324997054583514	2.86244926373848	0.00420380559142262	0.057320799087425
1478	PAS_chr2-1_0049	73.4999114514128	0.778264834425954	0.272047589084867	2.86076725415555	0.00422617184125672	0.057320799087425
3295	PAS_chr3_0656	32.8205382921109	-1.09294948728043	0.38176472506474	-2.86288757321696	0.00419799490504823	0.057320799087425
4482	PAS_chr4_0724	64.0729848327161	0.852285599641174	0.300887844201038	2.83256906540804	0.00461755897861005	0.0622354018312034
1143	PAS_chr1-4_0431	357.106788560816	-0.723196736026098	0.2563065691333	-2.82160827352801	0.00477835044517716	0.0636226720729797
1476	PAS_chr2-1_0047	39.170398833842	0.950798765583007	0.33716358319919	2.81999246941593	0.0048024776503765	0.0636226720729797
4345	PAS_chr4_0578	2023.0568596783	0.539904346398294	0.191488035702806	2.81951999986171	0.00480955337182581	0.0636226720729797
3930	PAS_chr4_0166	97.2256109032833	0.70989401633953	0.252261153017734	2.81412341078781	0.00489104474648839	0.0639116395836868
4081	PAS_chr4_0943	63.8000999287044	-0.76987115555335	0.273511042668642	-2.81477174757454	0.00488118893308282	0.0639116395836868
2758	PAS_chr3_0099	315.321650241307	-0.608046528523037	0.216658223235062	-2.80647796074346	0.00500863386003539	0.0650515294670051
2434	PAS_chr2-2_0240	102.67035013032	0.699620891994464	0.249697664570893	2.80187198865783	0.00508070293905241	0.0655900385445139
377	PAS_chr1-1_0109	199.87953357869	0.67352664179309	0.240676096601331	2.79847750276903	0.00513441460522781	0.0658865299341509
2074	PAS_chr2-1_0649	35.5927900972962	-1.06941325405722	0.382912771282545	-2.79283777993427	0.00522478864510473	0.0662687198670577
2118	PAS_chr2-1_0699	26.8388726389496	-1.0882308927151	0.389809476225419	-2.79169943032836	0.00524320357625415	0.0662687198670577
4320	PAS_chr4_0550	583.598316806502	0.529230495809097	0.189630514665174	2.79085091734074	0.0052569679782547	0.0662687198670577
1081	PAS_chr1-4_0368	156.90619700858	0.726583116850338	0.261129731821494	2.78246031879289	0.0053948462026703	0.0676090959784939
3458	PAS_chr3_0836	242.448914587493	-0.72581759808759	0.261877374374187	-2.77159338343791	0.0055782669373615	0.069501314225382
3611	PAS_chr3_0987	195.573030331919	0.626428467025741	0.22623725422462	2.76890059142864	0.00562457936470168	0.0696732576795127
730	PAS_chr1-4_0013	61.5460400979419	-0.793260969622172	0.286713400533732	-2.76673838106442	0.00566201727685277	0.0697339254269856
4219	PAS_chr4_0451	123.202445542413	0.65138889806867	0.235804081369388	2.76241570665721	0.00573753748431609	0.0702602447365108
2120	PAS_chr2-1_0701	111.045211161914	-0.86915046888728	0.315080394089701	-2.75850381423555	0.00580666275358075	0.0707027175052475
1724	PAS_chr2-1_0293	67.2541764285705	0.819833379311601	0.298007977953968	2.7510450724854	0.0059405468958681	0.0716142121252466
2674	PAS_chr2-2_0009	194.438098104833	-0.574734815880396	0.208947777332113	-2.75061464265724	0.00594835733004848	0.0716142121252466
1742	PAS_chr2-1_0311	98.7507430477419	0.728580151071599	0.267732266948883	2.72130124386802	0.00650254749132685	0.0778489344911365
3447	PAS_chr3_0822	25.9558686870685	1.11847340206083	0.412074271072335	2.71425197003988	0.0066425621210197	0.0790833923630289
4582	PAS_chr4_0821	1664.44443248907	-0.807163029176459	0.297944877745893	-2.70910188247928	0.00674656190144873	0.0798778019602465	AOX1
441	PAS_chr1-1_0174	108.014941216969	-0.668740914870369	0.2474185998582	-2.70287244068811	0.00687431220667712	0.0809431376863135
485	PAS_chr1-1_0217	179.361987943728	0.588161720905565	0.218295412104546	2.6943384436494	0.00705285086699001	0.0821427141736934
4327	PAS_chr4_0559	30.6457366254573	-0.984104814030952	0.36519552923444	-2.69473401302018	0.00704448406177149	0.0821427141736934
1572	PAS_chr2-1_0144	436.921729599537	0.58437595865395	0.217220979849768	2.69023719098454	0.00714012498219442	0.0827096639829331
889	PAS_chr1-4_0177	148.20861091243	0.68289198157184	0.254614855075616	2.68205867787656	0.00731706242650952	0.0843035740860747
4426	PAS_chr4_0665	176.259720821836	0.573711168682852	0.214512366000687	2.67448995775383	0.00748430177002129	0.0857692978243616
2760	PAS_chr3_0101	190.377147954933	-0.678021218898945	0.2549690129304	-2.65922988486459	0.00783195033989384	0.0892759020127261
2254	PAS_chr2-2_0420	174.100685404563	0.598310903127287	0.225583785599033	2.65227796199308	0.00799506933371886	0.0906530877362937
65	PAS_chr1-3_0076	62.0589114902611	0.789040986542461	0.298790255357832	2.64078554234476	0.00827140587266591	0.0920034381248769
1189	PAS_chr1-4_0479	61.1516131775481	0.776136525712962	0.293856872023329	2.64120597340105	0.00826114785199293	0.0920034381248769
1564	PAS_chr2-1_0136	93.1776592571959	-0.778032893176585	0.294687922490663	-2.64019267094747	0.00828589060107384	0.0920034381248769
3394	PAS_chr3_0766	104.618703599048	0.655419100474994	0.247781967585112	2.64514446657568	0.00816560466349393	0.0920034381248769
4182	PAS_chr4_0415	88.8975713145024	0.654001960429829	0.248016492756936	2.63692931530474	0.00836602622664326	0.0924144031118377
44	PAS_chr1-3_0054	120.907984035959	-0.600847704886092	0.228149434489254	-2.63357087091265	0.00844922004792809	0.0928547618600507
2267	PAS_chr2-2_0407	166.974326252036	0.608429626454185	0.231643249562977	2.62658043177196	0.00862476065350638	0.0943003167370622
1181	PAS_chr1-4_0471	198.817629896434	-0.661336763811938	0.252649486645739	-2.61760580871179	0.00885490309150939	0.0963251640868255
2253	PAS_chr2-2_0498	51.2077834300267	0.773125491646061	0.295616611964454	2.61529785660024	0.00891496739583076	0.0964887632791178
25	PAS_chr1-3_0034	147.797563743706	-0.585246177371128	0.224798889008893	-2.60342112877602	0.00922985017038397	0.0973257316102139
246	PAS_chr1-3_0268	53.6901849110277	0.784591235964877	0.301713850348192	2.60044818976464	0.00931020764353423	0.0973257316102139
708	PAS_chr1-1_0447	24.5460136206706	1.11240525415355	0.42685781221681	2.60603231876318	0.00915978183622341	0.0973257316102139
1061	PAS_chr1-4_0349	26.5676902511436	-1.21498071570425	0.466895529895223	-2.6022539045874	0.00926132572267245	0.0973257316102139
1739	PAS_chr2-1_0308	523.18035011088	-0.577874664402795	0.221518465969367	-2.60869748205419	0.00908875518977995	0.0973257316102139
3758	PAS_chr3_1136	21.2324888327362	1.15548863471136	0.444210165056578	2.60122060593589	0.00928926971043235	0.0973257316102139
4513	PAS_chr4_0756	27.2148479656611	-0.995332202807831	0.382303813926246	-2.60351104684467	0.00922742939057952	0.0973257316102139
3300	PAS_chr3_0662	368.181013641979	-0.522386899918192	0.201189664972533	-2.59648973514375	0.00941817197509132	0.0979764201098092
1246	PAS_chr1-4_0537	22.7488947649215	-1.08252518266681	0.418118501172135	-2.58903918298785	0.00962441424316157	0.0996382595318611
3793	PAS_chr4_0013	28.7487620199558	-1.05925543451102	0.409900667205387	-2.58417592177343	0.00976119912193733	0.100568508261114
931	PAS_chr1-4_0220	215.0783119279	0.698499802433855	0.271164590435614	2.57592557092999	0.00999721634196324	0.102507342683384
67	PAS_chr1-3_0294	46.9175322641126	0.870721972732416	0.338943720442684	2.56892787863186	0.0102013686214316	0.104102537884419
3629	PAS_chr3_1008	471.500868153022	-0.704300255872824	0.275214928019547	-2.55909176490165	0.0104946034939453	0.106587371030923
28	PAS_chr1-3_0038	65.9726864006812	0.69727593017728	0.273039810386822	2.55375188398143	0.0106569166584959	0.107219588728436
294	PAS_chr1-1_0030	68.3157250419747	-0.777829542247532	0.304514913582412	-2.55432331079254	0.0106394413121306	0.107219588728436
322	PAS_chr1-1_0055	24.7230090120999	1.1069615737014	0.43487954194993	2.54544412169394	0.0109138829845906	0.108783494120826
3440	PAS_chr3_0814	100.723150645835	-0.639831060697952	0.251344136128205	-2.54563750940896	0.010907839282857	0.108783494120826
523	PAS_chr1-1_0257	87.7835311010194	-0.873230906168161	0.343533059994075	-2.54191228693746	0.0110247836465033	0.109380145159521
1379	PAS_FragB_0006	23.3018020578337	1.10300179535029	0.434414053195993	2.53905643069206	0.0111151893267547	0.109578109570053
2003	PAS_chr2-1_0864	33.5722798240313	0.875904122971824	0.345108224378814	2.53805635767861	0.0111470032133792	0.109578109570053
4475	PAS_chr4_0716	55.4625947228662	0.866326032778985	0.341735663423382	2.53507645090492	0.0112422787797453	0.110010061301343
2078	PAS_chr2-1_0652	25.0984970136847	-1.04498436380488	0.412611673531591	-2.53260978988	0.0113216908397109	0.110283561225002
4520	PAS_chr4_0762	1202.00940197924	0.522501901973731	0.206813621352667	2.52643853222191	0.0115225550087626	0.111732286804426
1004	PAS_chr1-4_0294	84.3196029517086	0.673613678817558	0.266983771007366	2.52305103143881	0.0116341516336635	0.111802632066999
4609	PAS_chr4_0851	312.915011269425	0.578746015103519	0.229334775034622	2.5235859455512	0.0116164661033191	0.111802632066999
1672	PAS_chr2-1_0242	159.520098874578	0.605295636580523	0.24013254473658	2.52067306097355	0.0117130624633905	0.112058450263597
376	PAS_chr1-1_0108	55.1134036385477	0.870523394663504	0.345813442387958	2.51732086714804	0.011825108360327	0.11262758762747
609	PAS_chr1-1_0341	73.3361481298458	0.688297542232467	0.27360093019854	2.5156988382057	0.0118796645618418	0.11264655378773
1779	PAS_chr2-1_0351	48.4063986794927	-0.826392898808066	0.331748476365754	-2.49102243923184	0.0127376074927385	0.119722337091836
3722	PAS_chr3_1100	213.185610660577	0.609108101274892	0.244451184585336	2.49173716342642	0.0127120068149465	0.119722337091836
4581	PAS_chr4_0820	34.2846002976483	-0.915709285400905	0.370591650305214	-2.47093879380914	0.0134758880990733	0.126108420071241
57	PAS_chr1-3_0068	183.016611434476	-0.664757872561338	0.269802964109466	-2.46386423053391	0.0137448164900251	0.128065833644017
1073	PAS_chr1-4_0360	43.9562762745733	-0.809795454869191	0.328966392197973	-2.46163582078577	0.0138305020523312	0.128306345879419
2921	PAS_chr3_0262	50.5933891769808	0.740641326423368	0.301320985740058	2.4579812275747	0.0139720477391008	0.128506859677652
4427	PAS_chr4_0666	145.938665457452	0.649125607613507	0.26408662885348	2.45800255178256	0.013971218138146	0.128506859677652
4060	PAS_chr4_0290	31.9814426957375	0.890188855346598	0.363095553153854	2.45166553986796	0.0142196763303075	0.130225497332688
305	PAS_chr1-1_0037	46.9406857324357	-0.778105100841766	0.31767387668758	-2.44938333915005	0.0143101057996701	0.130381651262617
811	PAS_chr1-4_0101	55.0252743444343	0.720020462415651	0.294105640609714	2.44816951121021	0.0143584086318141	0.130381651262617
648	PAS_chr1-1_0385	48.3865243283824	-0.803583790662781	0.328648540924034	-2.44511595397141	0.014480557771161	0.130578192514091
2672	PAS_chr2-2_0011	40.8487254469481	0.850505955524814	0.347914346463316	2.44458431844084	0.0145019177873792	0.130578192514091
1511	PAS_chr2-1_0086	121.543755873454	-0.636835520644234	0.260676626422348	-2.44300967595167	0.0145653467647774	0.130600577895054
559	PAS_chr1-1_0291	128.964827177193	0.60147760496732	0.246784483882669	2.43725859707325	0.0147990917980778	0.132143557180336
3253	PAS_chr3_0612	156.101181368884	0.577125531247101	0.237257308775055	2.43248789353114	0.0149954928058233	0.133341664244313
1104	PAS_chr1-4_0675	224.397353293945	0.556522295732921	0.229264416970845	2.42742551629236	0.0152064089329711	0.134658406377508
2033	PAS_chr2-1_0868	55.3593783516141	-0.69989850349697	0.290222799693508	-2.41159035139935	0.015883115949659	0.139498022459505
2109	PAS_chr2-1_0684	26.1338384750201	0.923267197873765	0.382751022601394	2.41218740997402	0.0158571283378361	0.139498022459505
1019	PAS_chr1-4_0306	51.4494945199116	0.72950508681585	0.3027589327772	2.40952456835582	0.0159733205565942	0.139717656950128
1437	PAS_FragB_0067	271.361961101401	0.581414066974216	0.241948066592638	2.40305316410372	0.0162588235051307	0.14163682427437
11	PAS_chr1-3_0020	34.9991494468866	-0.84535902075444	0.352152797527319	-2.40054608877233	0.0163706290683088	0.14203343357646
3812	PAS_chr4_0041	61.1287962303891	-0.770591156256124	0.322442841221662	-2.38985351120382	0.016855094105841	0.145647043019425
4407	PAS_chr4_0645	24.9917983654539	0.933840445254598	0.391158305512408	2.38737215110718	0.0169693038182359	0.146045052540079
1422	PAS_FragB_0052	4408.45231299487	0.413124746660351	0.173162994268071	2.38575654346101	0.0170440300268782	0.1461014253904
1082	PAS_chr1-4_0369	43.2447600159877	1.6683206062275	0.700497854164694	2.38162129449615	0.0172366132458929	0.146579611849002
3029	PAS_chr3_0374	501.453314674737	-0.534798429543392	0.224429292269693	-2.38292615074833	0.0171756395170693	0.146579611849002
2406	PAS_chr2-2_0267	41.4591201327812	0.834608885966303	0.351124985825567	2.37695669536011	0.0174561373393844	0.147277568182287	KpPOT1
4587	PAS_chr4_0828	854.025213676271	0.467998096982817	0.196806522670239	2.37796029640224	0.0174087002572824	0.147277568182287
2448	PAS_chr2-2_0226	39.673700239455	0.890452341130425	0.375077077058074	2.37405161657627	0.0175940907565687	0.147281783169245
4465	PAS_chr4_0704	27.9359136493084	1.00345095894418	0.422500538391293	2.37502882899251	0.017547579598497	0.147281783169245
2788	PAS_chr3_0131	24.182946692862	0.951648917878637	0.401118030502803	2.37249100142854	0.0176685935121505	0.147329945122718
1661	PAS_chr2-1_0232	55.789090747278	0.746689238788607	0.315395823582446	2.36746710944769	0.0179103118966853	0.14819227179381
2140	PAS_chr2-1_0723	161.58299010617	0.52411253025241	0.221279331472137	2.36855618988711	0.017857667580704	0.14819227179381
2490	PAS_chr2-2_0186	157.082936827065	-0.582058069214098	0.246543488533742	-2.36087382666542	0.0182319325026179	0.150273197511962	PEX5
344	PAS_chr1-1_0078	54.4297361866578	0.729207419225048	0.309293392002025	2.35765599292297	0.0183907266704115	0.151001253849394
1449	PAS_chr2-1_0017	334.31286036744	0.501631320638693	0.213089316632971	2.3540894896327	0.0185681402822606	0.151876048186582
2821	PAS_chr3_1158	337.650962520764	-0.515245108860372	0.219044794523871	-2.35223626281711	0.0186609178755455	0.152054551358533
778	PAS_chr1-4_0067	56.8779749537234	-0.672476926541937	0.286875171976725	-2.34414474389055	0.0190707687561081	0.154805520622499
3574	PAS_chr3_0952	21.8385169822021	-0.964298759411817	0.412938384855502	-2.33521221271122	0.0195323374588902	0.157953959148686
1190	PAS_chr1-4_0480	344.795687565846	-0.48942196561805	0.210077705014667	-2.32971873709245	0.019821021570515	0.159685899344412
3081	PAS_chr3_0426	72.0385313857915	0.652925174885036	0.281166792647386	2.3221987516281	0.0202222361850063	0.162308060466174
1235	PAS_chr1-4_0686	63.6549173268584	0.657572289598933	0.283683636392023	2.31797751171742	0.0204505432761255	0.163502053880502
4640	PAS_chr4_0883	692.681749877033	0.629506125859032	0.271732905193484	2.31663561470702	0.0205235895911596	0.163502053880502
2537	PAS_chr2-2_0142	283.677425701619	0.490894479862632	0.212149798719267	2.31390499932655	0.0206729338318847	0.164081841487885
3823	PAS_chr4_0051	104.072934349052	-0.610138310129224	0.264200352551024	-2.30937735032504	0.0209226507619167	0.165451072261209
2444	PAS_chr2-2_0230	22.898055931966	-0.925882987183577	0.401920152518093	-2.30364907403318	0.0212423507112291	0.167361608728544
709	PAS_chr1-1_0448	77.0390620928945	-0.674587930043827	0.293055766441421	-2.30190976357625	0.0213402614944207	0.167517144258402
2073	PAS_chr2-1_0648	84.2184139345181	0.603534941271216	0.262834238860303	2.29625692561309	0.0216611954105908	0.169415845857285
2421	PAS_chr2-2_0251	27.0889198012593	0.914976165737925	0.399269959691219	2.29162285699013	0.0219274153646445	0.170874367732484
2743	PAS_chr3_0082	192.952029957443	-0.582017197242789	0.254143268460954	-2.29011455140001	0.022014677052829	0.170932800450046
3412	PAS_chr3_0781	33.5734068751471	-0.842298335912168	0.369815957150708	-2.27761490445614	0.0227495317025999	0.176000889670294
581	PAS_chr1-1_0313	96.308869967404	-0.570587271686369	0.250922479570454	-2.27395836619795	0.0229684898751202	0.17705566115965
3427	PAS_chr3_0799	135.223059522887	0.632935857718072	0.278676495653406	2.27122081549807	0.0231336139430261	0.177689371612562
1054	PAS_chr1-4_0340	38.9726958818817	0.872124854238212	0.385422407720836	2.26277672695641	0.0236494562567085	0.181002802707594
2197	PAS_chr2-1_0775	58.4184623566056	0.665382320977436	0.295533415832562	2.2514622216339	0.0243562770548117	0.185749116471393
196	PAS_chr1-3_0215	191.185619662607	0.683992866119306	0.30587234603612	2.23620368099094	0.0253384322134652	0.192554114303035
32	PAS_chr1-3_0044	104.60142765825	0.597236466714968	0.267382054881969	2.23364453900471	0.0255064708896734	0.193146173556785
3807	PAS_chr4_0037	46.2690805865135	-0.702297188022022	0.314666867421884	-2.23187523292826	0.0256232102213035	0.1933469700854
4554	PAS_chr4_0795	114.136830955687	0.565067158923043	0.253527732257704	2.2288179438637	0.0258260205333377	0.194193550887518
1521	PAS_chr2-1_0095	43.3159538754455	-0.729931284101683	0.328284218537589	-2.22347357223967	0.0261838835006357	0.196196022174344
2914	PAS_chr3_0255	31.4781722158744	0.779037932729788	0.3513487251937	2.21727838147214	0.0266040742529348	0.198649934230102
4439	PAS_chr4_0981	77.3775777717606	0.652527761179902	0.295719355252279	2.20657778934771	0.0273435700870891	0.203462745474416
951	PAS_chr1-4_0243	23.4458181505339	0.873216981626896	0.397049354199013	2.19926558850216	0.0278590430366094	0.20658106999119
1638	PAS_chr2-1_0211	37.2281177270321	-0.727755445865011	0.331713974462812	-2.19392459133976	0.028240831176933	0.208690004179888
4544	PAS_chr4_0785	1677.53878223485	0.470487436401342	0.214583988295962	2.19255611817798	0.0283393756781025	0.208698563842521
4115	PAS_chr4_0344	49.6990546999754	0.662217441226422	0.30247945491433	2.18929725793767	0.0285752415364093	0.209714871960703
669	PAS_chr1-1_0407	301.885413721024	-0.483559160271031	0.222790074676959	-2.1704699411416	0.0299712633663361	0.216394237815616
960	PAS_chr1-4_0253	23.2616928433698	-0.930107773283043	0.427863908093117	-2.17384022276686	0.0297171366196408	0.216394237815616
3471	PAS_chr3_0849	72.700887580224	0.603852455819157	0.278032988601788	2.17187341277701	0.0298652123873362	0.216394237815616
4071	PAS_chr4_0301	21.3318703664149	0.917076773484467	0.422573333160467	2.17021922946619	0.0299902420117769	0.216394237815616
4084	PAS_chr4_0944	29.0090534993196	1.0754631527915	0.495477780709115	2.17055778213167	0.0299646163260501	0.216394237815616
401	PAS_chr1-1_0131	34.2319055426419	0.876350976865219	0.404220874278093	2.16800030040585	0.0301586636816521	0.216879249227451
4447	PAS_chr4_0686	153.144331798121	0.47644330528086	0.219957303810319	2.16607176496272	0.0303057034072933	0.217207767230199
1278	PAS_chr1-4_0570	1866.63128820146	0.422101494162899	0.195325638529326	2.16101428026063	0.0306942363299435	0.218745622703069
4686	PAS_FragD_0003	43.0015454465025	-0.71445626747894	0.330671311192342	-2.16062368671397	0.0307244201743461	0.218745622703069
2697	PAS_chr3_0037	169.380155971394	0.478616172716246	0.22188997711068	2.15699771097597	0.0310058427973954	0.220018281837147
484	PAS_chr1-1_0216	142.976894677292	-0.55263525274623	0.256783761542918	-2.15214252422213	0.0313861308030026	0.221981776603414
943	PAS_chr1-4_0234	34.0988038653132	0.746531545852638	0.347169197007593	2.1503392359902	0.031528390970915	0.22225441398247
3097	PAS_chr3_0447	307.182053659191	-0.463729867865153	0.216431441575514	-2.14261784003946	0.0321437974560042	0.225552010220637
4107	PAS_chr4_0947	26.2890451165406	-0.853129933527457	0.398317110346664	-2.14183601800324	0.0322066799475104	0.225552010220637
3497	PAS_chr3_0871	31.6452567854837	-0.790792715118529	0.370209213260092	-2.13606978647221	0.0326737260032415	0.228077507573116
2817	PAS_chr3_1157	50.8555358126943	0.731348359707067	0.34279801600622	2.13346730598871	0.0328864108717383	0.228816813305633
2255	PAS_chr2-2_0419	1192.11420611417	0.475359013828841	0.224120763118932	2.12099498151622	0.033922224749993	0.235259959997524
82	PAS_chr1-3_0297	128.855508937863	0.486835000860146	0.229883041397968	2.1177508262445	0.0341961758721206	0.235376833778364
2822	PAS_chr3_0170	143.505426301635	-0.568354928243458	0.268484911261791	-2.11689709329428	0.034268582425968	0.235376833778364
4365	PAS_chr4_0597	423.853852914736	0.513266967336396	0.242173198406201	2.11942102063452	0.0340549018822833	0.235376833778364
1213	PAS_chr1-4_0503	26.9961991889575	-0.789851120468562	0.373401919183786	-2.1152840408402	0.0344057458344324	0.235563940329676
2731	PAS_chr3_0072	32.0639768061392	0.816147711206214	0.386858699174269	2.10967909716969	0.034886006147441	0.238091436859765
3032	PAS_chr3_1184	61.1483895606038	-0.617626776926737	0.293378335636653	-2.10522285357724	0.0352719138137036	0.239960988262752
3990	PAS_chr4_0225	92.4334141072596	-0.576316646481549	0.274332630108277	-2.10079510503027	0.0356589563364437	0.241826403256326
564	PAS_chr1-1_0296	22.5230343167216	0.879205585167258	0.419797318166087	2.09435731749818	0.0362281619603561	0.244911517605814
1619	PAS_chr2-1_0192	299.882542247766	-0.6079913771824	0.290810951661647	-2.09067565615543	0.0365571486565419	0.246358394877262
1498	PAS_chr2-1_0072	350.675328411048	-0.587090247022754	0.281127239383687	-2.08834351416757	0.0367668588799542	0.246994917177874
553	PAS_chr1-1_0285	82.1490698502359	-0.56514261164368	0.272541230362775	-2.07360409612677	0.0381160944799848	0.251276152748392
1227	PAS_chr1-4_0519	41.7562705902148	0.69862647047229	0.336629403898585	2.0753578338117	0.0379533830859137	0.251276152748392
1372	PAS_c121_0015	22.7724973551487	0.853301709029641	0.411297294668369	2.07465918227754	0.0380181328888924	0.251276152748392
1995	PAS_chr2-1_0571	21.2487177695358	-0.870200736261978	0.420402214503972	-2.06992424454452	0.0384594391514105	0.251276152748392
2474	PAS_chr2-2_0202	149.950496425474	0.525493928533082	0.253861679130347	2.07000099555499	0.0384522512261139	0.251276152748392
3171	PAS_chr3_0522	77.0921806464274	-0.548823401264661	0.263970270607967	-2.07911065136475	0.0376071813255199	0.251276152748392
3493	PAS_chr3_0868	1040.93571357862	0.402492238700785	0.194367130368807	2.07078345982196	0.0383790366155353	0.251276152748392	FBP1
4321	PAS_chr4_0551	156.759528998669	0.564197554183593	0.271782369274684	2.07591668175271	0.0379016575753686	0.251276152748392
4568	PAS_chr4_0808	150.669421248438	0.505355218836015	0.243170805543477	2.07819033911808	0.0376918315563016	0.251276152748392
361	PAS_chr1-1_0094	62.8569818023883	-0.627482452958037	0.30379474982509	-2.06548155726625	0.0388774587897135	0.252467861170776
4638	PAS_chr4_0880	31.1024250094572	0.779697842508551	0.377312829259992	2.06644932810194	0.0387860723149522	0.252467861170776
3877	PAS_chr4_0112	474.352140144598	0.47891735050232	0.232507159807828	2.0597961408937	0.0394180336685748	0.254436283589626
4088	PAS_chr4_0945	62.3002591847142	0.61931363347816	0.300489878534028	2.06101329102846	0.0393017721061884	0.254436283589626
4424	PAS_chr4_0663	20.7205047915	0.895221255988281	0.435329638841925	2.05642156222069	0.0397418996906556	0.255756429540765
1571	PAS_chr2-1_0143	44.171409129779	0.678972164391655	0.33070159788568	2.05312634935126	0.0400603250665881	0.257033762328438
1940	PAS_chr2-1_0516	59.3483914186861	-0.578743636084904	0.282356247155313	-2.04969304527752	0.0403943941183073	0.257673931247229
4607	PAS_chr4_0849	96.0738701062094	0.572333184397826	0.279237357833469	2.04962970871238	0.0404005790476291	0.257673931247229
1453	PAS_chr2-1_0024	22.328280618862	-0.859846573878546	0.420527692112464	-2.04468478534487	0.0408859445636014	0.258461885545126
2447	PAS_chr2-2_0227	201.819200378036	0.477690354134712	0.233508173855057	2.04571148944544	0.0407847646631712	0.258461885545126
3224	PAS_chr3_0578	73.3706987536841	-0.672575310695543	0.328682676120963	-2.04627550996335	0.0407292717889951	0.258461885545126
2509	PAS_chr2-2_0170	39.5575278421504	0.73254861026234	0.35852417590489	2.04323350974433	0.041029328026641	0.258605441062034
4217	PAS_chr4_0449	30.6514392255752	-0.735146778331751	0.362912771813429	-2.02568450445631	0.0427971256124225	0.268956716092145
1796	PAS_chr2-1_0368	45.881423988315	0.617399769278672	0.305499013006123	2.020955037476	0.0432844197254432	0.271223717753289
2784	PAS_chr3_0126	270.284905597634	-0.420710552606248	0.208770520654882	-2.01518179523882	0.0438856042775524	0.274189066958586
1771	PAS_chr2-1_0342	65.4026432376957	-0.580704888793356	0.289055273288698	-2.00897524610585	0.0445397589847946	0.277467161350043
353	PAS_chr1-1_0086	26.891975621206	0.795704143813024	0.396722951635858	2.00569223568235	0.0448890941173508	0.278832836792704
3792	PAS_chr4_0012	105.952613191485	-0.571759617480603	0.285396341575564	-2.00338804037969	0.0451356541533439	0.279554066042243
64	PAS_chr1-3_0075	31.9036696467889	0.798543311289452	0.399858262589313	1.9970659256068	0.0458180218794545	0.280959896279188
352	PAS_chr1-1_0085	199.8022239986	0.443912907745547	0.222487456516429	1.99522667343167	0.0460181631329888	0.280959896279188
583	PAS_chr1-1_0315	116.642270814095	-0.545577529771041	0.272969786100634	-1.99867369046443	0.045643671440488	0.280959896279188
718	PAS_chr1-4_0002	60.7741778113695	-0.583063527560595	0.291721334182809	-1.99870033226714	0.0456407870451908	0.280959896279188
2049	PAS_chr2-1_0871	477.78204507908	0.380989086093956	0.19092036879583	1.99553923186366	0.0459840997317758	0.280959896279188
405	PAS_chr1-1_0135	473.36490640808	0.372700796650429	0.187023190848383	1.99280525029953	0.046282776631133	0.281308614035136
4469	PAS_chr4_0709	136.66318858006	0.444231895388432	0.222974056998516	1.9923030569937	0.0463378164976215	0.281308614035136
665	PAS_chr1-1_0403	42.2606049603905	-0.627682655110352	0.315686937151653	-1.98830734262793	0.046777709218199	0.28275710551854
4097	PAS_chr4_0325	81.8192880024698	-0.542576688493202	0.272961415010817	-1.98774133872254	0.0468403044606074	0.28275710551854
280	PAS_chr1-1_0017	28.0927932504082	0.776425053004315	0.390890110999034	1.98630006530463	0.0470000154055409	0.282924250039534
1605	PAS_chr2-1_0178	41.9135828795699	0.670126612493749	0.337622087904889	1.98484233259801	0.0471620159962865	0.283104202465103
1172	PAS_chr1-4_0460	40.0693618224148	-0.719147729187583	0.363580987759996	-1.9779574658681	0.0479335052173421	0.285337504668789
1676	PAS_chr2-1_0245	168.724709684055	0.517701504589398	0.261594772640043	1.97902083197113	0.0478136608630878	0.285337504668789
3426	PAS_chr3_0797	42.2177906731739	-0.629058566578479	0.317826965114573	-1.97924857115793	0.0477880267853785	0.285337504668789
3407	PAS_chr3_0778	1482.44074485036	0.360199164248017	0.182504522551468	1.97364514156868	0.0484221070060889	0.287447577047226
3453	PAS_chr3_0826	243.051817790233	-0.410841008403044	0.20884767351815	-1.9671802011591	0.0491624397160656	0.291036210805328
4606	PAS_chr4_0847	142.845657900616	0.462496255533701	0.235418298697284	1.96457224477868	0.0494637669996051	0.292013368264886
355	PAS_chr1-1_0088	53.7955706872637	0.650176342437723	0.332004380503678	1.95833663836409	0.050190524318615	0.294185357068311
1308	PAS_chr1-4_0602	60.9574128381589	0.609937882619088	0.311612525182595	1.95735996896044	0.0503051614758155	0.294185357068311
2750	PAS_chr3_0090	39.508664038351	0.669085354734732	0.342137590178118	1.95560316651089	0.0505119195930416	0.294185357068311
3105	PAS_chr3_0456	193.528790934515	-0.466053976685683	0.238124378400866	-1.95718716334501	0.0503254674694838	0.294185357068311
4448	PAS_chr4_0687	157.453705413645	-0.577529530131428	0.295328281156413	-1.95555104939494	0.0505180641162569	0.294185357068311
840	PAS_chr1-4_0133	199.950097053031	-0.438479156234132	0.22453256979616	-1.95285323920802	0.0508369879067131	0.295240284780721
340	PAS_chr1-1_0470	117.223279124376	0.463217012227448	0.237510401086953	1.95030200828074	0.0511401334516703	0.295399746595497
2625	PAS_chr2-2_0056	26.5046823556719	0.78420118454392	0.402040977929067	1.95055038564322	0.0511105540954728	0.295399746595497
2835	PAS_chr3_0181	111.041735921497	-0.481068557935392	0.247011488384641	-1.94755539947309	0.0514681848339424	0.296495484137469
975	PAS_chr1-4_0269	21.6972263536634	-0.798206795996962	0.410164946418407	-1.94606292655423	0.0516471812257245	0.296728979535463
1191	PAS_chr1-4_0481	97.756065172465	-0.476326256841218	0.24571644372936	-1.93852006651154	0.0525598050701602	0.300580093579879
3099	PAS_chr3_0449	5704.95959399148	-0.320311463810018	0.165261766997735	-1.93820669855483	0.0525980098424894	0.300580093579879
3861	PAS_chr4_0094	104.843734376794	-0.49846060796462	0.257564341106592	-1.93528578460453	0.0529552357822704	0.301816676280333
425	PAS_chr1-1_0158	81.8542874008095	0.534774928367895	0.276566105715496	1.93362424865619	0.0531593436424988	0.302176322084549
940	PAS_chr1-4_0231	32.0938603842966	-0.679326845605504	0.35201057369426	-1.92984784086496	0.0536256937772883	0.303218632624614
1022	PAS_chr1-4_0309	36.4557335556299	0.635634184718641	0.329253803253957	1.93052951381815	0.0535412619410486	0.303218632624614
3459	PAS_chr3_0837	184.12455917565	0.404517812841865	0.209846707696993	1.92768243677173	0.0538946379897846	0.303937392663443
4391	PAS_chr4_0626	22.7727418639186	0.792058674419067	0.411638637319684	1.92416017985198	0.0543345086978443	0.305613785142993
1613	PAS_chr2-1_0186	39.1383111119481	0.711491040342014	0.370235022099183	1.92172808587355	0.0546399813108002	0.306527434421584
3558	PAS_chr3_0936	108.016040993841	0.496558167115253	0.258833113779386	1.91844914997425	0.0550540839767239	0.308044130449397
4440	PAS_chr4_0678	143.882396490543	0.481244305514154	0.251052943478708	1.91690365723582	0.0552501723775928	0.308336248450993
2454	PAS_chr2-2_0220	1888.66464037414	0.344782980230123	0.180048624518064	1.91494370564065	0.0554996832157777	0.308924210730939
4194	PAS_chr4_0427	186.977412616669	0.411268935097402	0.215125189205074	1.91176559387171	0.055906266697663	0.310381164593502
3063	PAS_chr3_0408	1778.27302845539	-0.365636403171546	0.191464211274905	-1.9096853701111	0.0561737357682514	0.311060247419542
542	PAS_chr1-1_0489	160.272277858582	-0.487706133639453	0.256996262530918	-1.8977168338422	0.057733393812992	0.315345481038109
744	PAS_chr1-4_0027	70.7506484829992	-0.531020173902974	0.280093605777178	-1.89586682077068	0.0579776572697223	0.315345481038109
3086	PAS_chr3_0432	23.0690097974828	-0.77223648064669	0.40720387499395	-1.89643696455041	0.0579022878772929	0.315345481038109
3158	PAS_chr3_0509	54.5659421968667	0.541876758485789	0.285514243916106	1.89789746057297	0.0577095909633155	0.315345481038109
3671	PAS_chr3_1052	28.7336800609143	0.696668846292725	0.36692930308254	1.89864598013861	0.0576110385728877	0.315345481038109
4036	PAS_chr4_0267	92.8035490453217	-0.538505668695462	0.28350658690446	-1.89944676268469	0.0575057600340378	0.315345481038109
4272	PAS_chr4_0504	66.0969721258688	0.646965205755203	0.340488797740602	1.90010716959941	0.0574190570226399	0.315345481038109
3791	PAS_chr4_0011	38.0201237807303	-0.645866195537045	0.340966640830898	-1.89422107090342	0.0581956724221983	0.315729939242458
3122	PAS_chr3_0471	44.7810663231421	0.622797702354445	0.329392842428051	1.89074449148203	0.0586584601942733	0.317437071202847	KpHOM2
2091	PAS_chr2-1_0876	38.889577996131	-0.679207999662117	0.359717558646535	-1.88817026952393	0.0590030957077378	0.318497818895925
1917	PAS_chr2-1_0492	399.012673088801	0.407608031094046	0.216396029020504	1.88362066041159	0.0596163051828519	0.320999351776009
700	PAS_chr1-1_0439	350.782175163717	-0.452089665419564	0.240726361500735	-1.87802309062102	0.0603780063525175	0.321022795583108
758	PAS_chr1-4_0045	51.724976909049	0.614071645861465	0.326908638718167	1.87841975748725	0.0603237647815998	0.321022795583108
1850	PAS_chr2-1_0427	65.8330398648801	0.541922244232339	0.287965223769873	1.88190170027411	0.0598493635547381	0.321022795583108
2616	PAS_chr2-2_0454	45.4509506650661	-0.600552629539141	0.320141380042534	-1.87589817179945	0.0606692637476243	0.321022795583108
3350	PAS_chr3_0712	105.780075991245	0.514541254478841	0.274267205613038	1.87605825249412	0.0606472814043297	0.321022795583108
3487	PAS_chr3_1230	217.875787922715	0.431474054843768	0.22985724852224	1.8771392140893	0.0604990160419815	0.321022795583108
3777	PAS_c131_0011	34.4943266530331	-0.682866391881205	0.363316413453143	-1.87953631213877	0.0601713001614364	0.321022795583108
2554	PAS_chr2-2_0126	32.3510773138433	0.661349556822304	0.353622523476218	1.87021332895042	0.0614541994963528	0.324375245124837
1614	PAS_chr2-1_0187	23.3734261729615	0.761116434389134	0.40765494174949	1.86706048778099	0.0618931413777146	0.325142647300306
4209	PAS_chr4_0441	135.807753074536	0.416427466489473	0.223047549529811	1.86698965026656	0.0619030331770998	0.325142647300306
2987	PAS_chr3_0335	266.180885125618	-0.511573428102871	0.275182872640793	-1.85903077176844	0.063022776791217	0.328723577990725
3463	PAS_chr3_0841	720.899095016689	-0.405327593857431	0.218046643491476	-1.85890315653162	0.0630408666109925	0.328723577990725	DAK1
4133	PAS_chr4_0367	29.2727568155524	0.727066374940212	0.391132651851552	1.85887414793526	0.0630449792600037	0.328723577990725
3783	PAS_c131_0021	285.772879305969	-0.40540937245891	0.218262035988377	-1.85744337361766	0.0632481004760038	0.328982231359408
3648	PAS_chr3_1028	555.734302768674	-0.476872247396138	0.257343620105466	-1.85305642005309	0.0638742723121103	0.331434783450006	FLD1
684	PAS_chr1-1_0422	206.39182303274	-0.420279362754829	0.227602816793765	-1.84654728212635	0.0648127806891861	0.334683828956447
4113	PAS_chr4_0342	60.5473719241093	0.515663408323404	0.279198537788585	1.84694165094043	0.0647555973462581	0.334683828956447
260	PAS_chr1-3_0287	54.9976335448448	-0.543262967042547	0.295101293689749	-1.84093726005044	0.0656307533763642	0.337114917307637
816	PAS_chr1-4_0107	60.4598576699616	-0.537794226436206	0.29210107213498	-1.84112376755567	0.0656034234185801	0.337114917307637
1828	PAS_chr2-1_0404	21.9187299212399	0.760254586493539	0.413162357021189	1.84008676873375	0.0657554995028429	0.337114917307637
3936	PAS_chr4_0173	35.7145959612802	0.620490106780121	0.337491900085501	1.83853332960858	0.0659838552485012	0.337478285912979
1550	PAS_chr2-1_0122	76.4494451770564	-0.504288081668931	0.274794625824794	-1.83514535684719	0.066484154995271	0.338421720082817
3710	PAS_chr3_1087	265.178279894051	0.376245689444241	0.204995113794182	1.83538857331983	0.0664481355795976	0.338421720082817
1793	PAS_chr2-1_0365	50.6316108232385	-0.613247785892985	0.334787753702711	-1.83175094999904	0.0669885340241281	0.340179242886098
3106	PAS_chr3_1191	30.0974553046286	0.697494094803996	0.381000768994616	1.83068946722743	0.0671469060853101	0.340179242886098
189	PAS_chr1-3_0205	24.2877168606929	0.721645919684733	0.394944121195639	1.82721018229123	0.0676681734952883	0.340405858686392
1544	PAS_chr2-1_0116	86.9632152957257	-0.463860096225194	0.253611814608457	-1.82901611638768	0.0673971939433077	0.340405858686392
3015	PAS_chr3_0361	52.5624215901266	-0.607790098917092	0.332589777827363	-1.827446720965	0.0676326300507616	0.340405858686392
39	PAS_chr1-3_0051	92.2456634213449	0.475847815517829	0.260579665815571	1.82611261714725	0.067833300075059	0.34043738187553
1295	PAS_chr1-4_0590	54.4459989803308	0.535086802767427	0.293580560920125	1.82262340902403	0.0683604476804862	0.340689393905307
1433	PAS_FragB_0064	63.3321505831644	0.574383183084835	0.314900634899151	1.8240140521431	0.068149947853181	0.340689393905307
3167	PAS_chr3_0518	40.0106456479874	-0.674565771365779	0.369943022728776	-1.82343152842847	0.0682380587461702	0.340689393905307
3992	PAS_chr4_0226	106.220031247128	-0.464614580868945	0.255086239446906	-1.82140197713664	0.0685457748584085	0.34082040724262
2203	PAS_chr2-1_0779	165.955895360331	-0.483524807280083	0.266106167803696	-1.81703720462719	0.0692114167800176	0.343199677327915
2597	PAS_chr2-2_0081	50.7640843187606	-0.603586901265708	0.332340880519382	-1.81616808718332	0.0693445918259389	0.343199677327915
2145	PAS_chr2-1_0728	221.562033944668	-0.53649150169165	0.295941229470972	-1.81283122547909	0.0698578562938092	0.344150312730191
3904	PAS_chr4_0139	269.549265491676	-0.383903395971309	0.211715840978868	-1.81329556728648	0.0697862466207713	0.344150312730191
2796	PAS_chr3_0140	206.179541248611	0.419890744583753	0.232124804520464	1.80890079994332	0.0704664161255925	0.345559564661658
4422	PAS_chr4_0661	56.0877129339182	0.516176648470371	0.285332246679373	1.80903719953671	0.0704452243536054	0.345559564661658
2459	PAS_chr2-2_0215	22.1593401286234	0.767419153269585	0.424787031104863	1.80659741723645	0.0708250725131692	0.345736060126928
3389	PAS_chr3_0762	276.355517846813	-0.402967201668438	0.223020341109567	-1.80686299583079	0.0707836434578001	0.345736060126928
2274	PAS_chr2-2_0400	87.7256718573679	0.472294844510602	0.262203870446444	1.80125046860081	0.0716634109364595	0.349033385538256
628	PAS_chr1-1_0364	20.623211013246	0.765637329497758	0.425639112003611	1.79879458420462	0.0720511803549501	0.350126257371107
4174	PAS_chr4_0407	2923.9030993007	-0.419482026731453	0.233346645477284	-1.7976775533818	0.0722281205292102	0.350191996140492
2861	PAS_chr3_1161	22.2530090221671	-0.767442220046522	0.427362864568296	-1.79576253267059	0.0725322918956978	0.350872915423206
2639	PAS_chr2-2_0043	21.9423960067739	0.782945766094249	0.436943952518139	1.79186772486969	0.0731541570671127	0.35308414097933
3266	PAS_chr3_0625	93.812832383853	0.536461776629585	0.29983899141417	1.78916615914228	0.0735880599085331	0.354380252548284
69	PAS_chr1-3_0079	21.2990298542959	-0.754360960379895	0.421965896912687	-1.78772968597504	0.0738196298728428	0.354698356093054
506	PAS_chr1-1_0486	46.6957720131303	-0.654793771812825	0.36783310292699	-1.7801382382455	0.0750533400239153	0.356801495976643
549	PAS_chr1-1_0282	44.3588703109671	-0.563150337047282	0.316572395148268	-1.77889906283057	0.0752563117972201	0.356801495976643
550	PAS_chr1-1_0283	218.986638913602	0.373713486333228	0.209679071528704	1.78231181399556	0.0746983972132793	0.356801495976643
1315	PAS_chr1-4_0611	24.9990862296443	0.704213968584908	0.395283816243813	1.78154009763594	0.0748242604277749	0.356801495976643
1435	PAS_FragB_0065	150.401231288757	-0.556149392869741	0.312461998869971	-1.77989449879048	0.0750932281769777	0.356801495976643
4298	PAS_chr4_0974	1297.62304023524	0.369554823296294	0.207735673295205	1.77896659458741	0.0752452388427353	0.356801495976643
2099	PAS_chr2-1_0675	27.619984057894	-0.680318814845884	0.384196412796785	-1.77075785245743	0.0766009774828759	0.362375043588969
2417	PAS_chr2-2_0256	34.6034661227704	-0.619521616239525	0.350763525940961	-1.76620877150095	0.0773608300116857	0.365163565451635
2166	PAS_chr2-1_0748	935.338911165578	-0.43594237663925	0.247246824125729	-1.76318696177697	0.0778689620586222	0.36594996862199
4576	PAS_chr4_0815	908.054982192383	0.358026454705385	0.202943777968283	1.76416571273912	0.0777040835567056	0.36594996862199
2238	PAS_chr2-2_0436	70.5372123772517	-0.500346307020752	0.284003827773473	-1.76175902607848	0.0781100202619613	0.366279591731692
2660	PAS_chr2-2_0024	300.036276555555	1.2412273348367	0.705858467994997	1.75846489220768	0.0786684401083201	0.367290778109216
2957	PAS_chr3_0295	85.9241631017626	0.512468319358573	0.291295846190056	1.75927094759948	0.0785314987231687	0.367290778109216
4681	PAS_FragD_0013	116.354630549328	-0.48885838594082	0.278189489976841	-1.75728560407339	0.078869140324685	0.367427321121304
487	PAS_chr1-1_0219	178.257146446436	-0.451068841859707	0.257105394566677	-1.75441220367987	0.0793599017385314	0.367866821129937
1532	PAS_chr2-1_0105	32.6172802314099	0.632833908727246	0.360775559080423	1.75409307199265	0.0794145605987286	0.367866821129937
2133	PAS_chr2-1_0716	249.486820411733	-0.426816819579728	0.243377943031814	-1.75372021910767	0.0794784592548582	0.367866821129937
2768	PAS_chr3_0110	53.7503020519089	0.565484774493719	0.322826274774758	1.75166898942246	0.0798307421602955	0.368293267473873
3363	PAS_chr3_0731	176.531563425645	-0.407172732667371	0.232512891451241	-1.75118347256353	0.079914311421069	0.368293267473873
3949	PAS_chr4_0186	117.390212836876	-0.423202865962656	0.242682909270879	-1.7438511316439	0.0811850518099551	0.373233784289806
4273	PAS_chr4_0505	298.464424171969	0.371302320787158	0.213232551039436	1.7413022494792	0.0816306121194805	0.373233784289806
4483	PAS_chr4_0725	39.8432852257638	0.579767069705695	0.333007437799336	1.74100336478085	0.081682988722314	0.373233784289806
4579	PAS_chr4_0818	36.5768311166238	0.625492766386395	0.359113065018764	1.74177112256752	0.0815485016291924	0.373233784289806
178	PAS_chr1-3_0194	22.5929272006467	0.729081192544549	0.419182098303168	1.73929467764926	0.0819829430378088	0.373807333893669
4155	PAS_chr4_0387	180.267538362778	0.384040196571048	0.221339062846977	1.73507645524168	0.0827272640316083	0.376400269256341
156	PAS_chr1-3_0169	61.9525579490974	0.61598598894493	0.355519691634773	1.73263536011877	0.0831605002116092	0.377432664833507
297	PAS_chr1-1_0031	210.808819971696	0.42676341254355	0.246566118614998	1.73082747516467	0.0834825399585079	0.377432664833507
2384	PAS_chr2-2_0488	116.758859618083	0.409487521432498	0.23657604842674	1.73089171180109	0.0834710801627351	0.377432664833507
4264	PAS_chr4_0497	21.7860463221813	0.739455132456769	0.427817615377366	1.72843544977576	0.0839101845056939	0.378567421885688
1731	PAS_chr2-1_0301	34.9905765763264	-0.588253117330091	0.341640616769933	-1.72184772083535	0.0850971073857079	0.382312580980235
2044	PAS_chr2-1_0622	29.0374474465803	0.629687151807009	0.365589608115472	1.72238799415798	0.0849992570741147	0.382312580980235
1710	PAS_chr2-1_0278	65.426578055791	0.490736145960378	0.285527836571746	1.71869808510621	0.0856693609059953	0.383276493573169
1990	PAS_chr2-1_0565	35.6769595415355	-0.597094558269151	0.347312567534152	-1.71918500533511	0.0855806902548034	0.383276493573169
3066	PAS_chr3_0411	164.796304656994	-0.379795129806086	0.221233837423976	-1.71671356528631	0.0860315203529297	0.384094891909017
529	PAS_chr1-1_0264	26.0181020854516	-0.675583116147561	0.393878290945953	-1.71520779813748	0.0863071356607528	0.384524307112252
1195	PAS_chr1-4_0486	40.9934668684629	0.579296388168362	0.338416361627983	1.71178599457072	0.0869361140097124	0.38652301311787
2553	PAS_chr2-2_0127	743.907389268034	-0.322388430975228	0.18844696295031	-1.71076480049315	0.0871245399187122	0.38655877649234
4589	PAS_chr4_0830	77.5964318818724	0.527557984174732	0.308574827997046	1.70965981768215	0.0873287972715666	0.3866644887458
477	PAS_chr1-1_0210	123.09175165019	0.532488534464915	0.311716195427919	1.70824789431913	0.0875903550756005	0.387022950364973
3713	PAS_chr3_1089	36.6584652456388	-0.640071783569954	0.37494294524589	-1.70711782068653	0.0878001554435119	0.387151714229313
92	PAS_chr1-3_0104	866.450739628829	0.418933217686551	0.245595368606689	1.70578631047988	0.0880478728318663	0.387446799750902
2542	PAS_chr2-2_0137	118.170818457	-0.43256986587849	0.25381982685479	-1.70423985879544	0.0883362855137709	0.387919384950842	KpCYS4
1402	PAS_FragB_0033	21.1344074505936	0.699405903782055	0.412765609945757	1.69443840991009	0.0901820059416889	0.392072610046282
1662	PAS_chr2-1_0233	30.1404003776849	1.56685388961508	0.923764971782585	1.69616075243851	0.0898554409050149	0.392072610046282
3138	PAS_chr3_0488	382.875256572845	-0.331612064320134	0.195415983420536	-1.69695466315314	0.089705232203038	0.392072610046282
3565	PAS_chr3_1242	160.08092232682	0.425505992107539	0.251331921945021	1.69300417079777	0.0904546733192363	0.392072610046282
3809	PAS_chr4_0038	692.896731786473	0.338455050559611	0.199436844779547	1.69705377626552	0.089686494105844	0.392072610046282
3842	PAS_chr4_0917	519.67430409678	0.346645237577867	0.204820205587892	1.69243672313919	0.0905627354049974	0.392072610046282
4083	PAS_chr4_0311	102.764651560468	-0.449163357100838	0.265348214188059	-1.69273178820983	0.0905065316351775	0.392072610046282
2534	PAS_chr2-2_0148	232.765592107675	0.393371780620223	0.232612028230975	1.6911067910453	0.0908164084233108	0.392378151716038
206	PAS_chr1-3_0227	35.5561818796352	0.577220195814183	0.341892250637124	1.6883102636533	0.09135168603222	0.393896706573536
363	PAS_chr1-1_0473	154.005873522954	0.432182217586184	0.257968230142868	1.67533117293874	0.0938692724539213	0.397553064958011
432	PAS_chr1-1_0165	90.2534376101783	0.416701342115137	0.248709424019207	1.67545457418194	0.0938450766507836	0.397553064958011
792	PAS_chr1-4_0082	27.2789502652462	-0.640114897012377	0.381081703324803	-1.67973138418245	0.0930095906337114	0.397553064958011
1736	PAS_chr2-1_0305	27.1859950686572	-0.674853042535133	0.401612733686795	-1.6803576827358	0.0928877442575299	0.397553064958011
1861	PAS_chr2-1_0838	25.2719757569085	0.647557562821021	0.38603560034721	1.67745555653052	0.0934534332751925	0.397553064958011
2420	PAS_chr2-2_0252	23.2472527814799	0.699233990078957	0.416330386450453	1.67951706826033	0.093051315241858	0.397553064958011
2724	PAS_chr3_0064	105.414147247732	0.491995024412237	0.293491913703156	1.67634950552625	0.093669753317283	0.397553064958011
2803	PAS_chr3_0149	26.1736920182704	-0.656938130104357	0.391409619100123	-1.67839035641153	0.0932709189863639	0.397553064958011
4146	PAS_chr4_0953	30.2466093932712	-0.670369117484945	0.398784989680778	-1.6810289625534	0.0927572890768041	0.397553064958011
2056	PAS_chr2-1_0631	136.885481703814	0.385738525968262	0.230382407229878	1.6743402007401	0.0940637580126954	0.397590992941235
941	PAS_chr1-4_0232	47.5274705627131	-0.514894350481411	0.307705519784649	-1.67333478723997	0.0942614078415593	0.397642120087523
58	PAS_chr1-3_0069	56.7523877625772	-0.501204927637494	0.300344911014635	-1.66876450792626	0.0951640591635552	0.39987564468137
3472	PAS_chr3_1226	104.858631919585	-0.413780333931774	0.24789193892688	-1.66919640760818	0.0950784618310347	0.39987564468137
4676	PAS_FragD_0018	63.7595988162662	-0.470593473630784	0.282741334130805	-1.66439574559365	0.0960333697171483	0.402738769674851
2867	PAS_chr3_1162	90.7451733744816	-0.441780091932744	0.265920572536178	-1.66132348362269	0.0966484960464606	0.404526810600713
4610	PAS_chr4_0852	24.0714485706458	0.648616887370186	0.392793309201925	1.6512931156797	0.0986787373389232	0.412219364751096
2741	PAS_chr3_0079	22.3276539221784	-0.696848198572009	0.422878368438027	-1.64786910511866	0.0993795344307969	0.414339187325288
90	PAS_chr1-3_0101	82.2986325071986	0.437024508364352	0.265629706888315	1.64523958364378	0.0999204134858532	0.415785332233366
2251	PAS_chr2-2_0423	42.1745256870418	-0.5328103141398	0.324345993111466	-1.64272204823166	0.100440454835151	0.416332484935646
3267	PAS_chr3_0626	37.4538425379673	0.62180443625996	0.378392042759633	1.64328095201238	0.100324817481143	0.416332484935646
3928	PAS_chr4_0164	100.858903154252	0.436031335694069	0.266037783890078	1.63898273891136	0.101216854596753	0.417456340061608
3963	PAS_chr4_0201	437.780527753677	0.404420934051699	0.24680838234242	1.63860291215964	0.10129598545592	0.417456340061608
4191	PAS_chr4_0423	70.9374669032193	0.456983991514529	0.278791128551927	1.63916260136453	0.10117940029948	0.417456340061608
157	PAS_chr1-3_0170	28.4759419493701	-0.624403603388806	0.381492524649782	-1.63673876431005	0.101685065586743	0.41825546171284
1810	PAS_chr2-1_0384	27.8048358129657	-0.624140509624406	0.38195205744887	-1.63408076341612	0.102241893460294	0.419541575998176
1892	PAS_chr2-1_0468	142.791496323879	0.410928686579528	0.25158194099082	1.63337910885473	0.10238928802942	0.419541575998176
546	PAS_chr1-1_0490	55.6645186852841	-0.602577829223252	0.369743455428787	-1.62971871543865	0.10316096000695	0.421896826898652
3491	PAS_chr3_1231	30.0990112515397	0.610009367137884	0.375024036389906	1.62658738626467	0.10382476006912	0.422997073817725
4274	PAS_chr4_0506	22.6083739668298	0.672996327614635	0.413672205801921	1.62688311705642	0.103761924304165	0.422997073817725
347	PAS_chr1-1_0081	40.0268040671813	0.525784582070092	0.323640330346056	1.6245953695199	0.104248804440447	0.423918762648726
3551	PAS_chr3_0930	62.5910106288922	0.444813501178692	0.274088311559066	1.62288387508577	0.10461423119914	0.424599048219238
135	PAS_chr1-3_0150	37.060641427333	-0.558136721952884	0.344333905097772	-1.62091712053277	0.105035414581314	0.42469979895803
527	PAS_chr1-1_0487	48.7127100866493	-0.487132820815058	0.300467410257638	-1.62125010628395	0.10496401069387	0.42469979895803
2649	PAS_chr2-2_0035	52.4442879071986	0.518157592252971	0.3210713320623	1.61383948210122	0.106562248156945	0.429440229093242
4104	PAS_chr4_0334	34.27385043695	0.620443762224617	0.384502843666263	1.61362593917028	0.106608586970418	0.429440229093242
1273	PAS_chr1-4_0564	37.5190169393901	0.534219833757241	0.332033813619381	1.60893201789873	0.107631207484888	0.432072155820941
4370	PAS_chr4_0602	65.404589959456	-0.497701778168953	0.309366623160092	-1.60877658063133	0.107665203550342	0.432072155820941
242	PAS_chr1-3_0309	96.3835872511849	0.420591284434223	0.261683674381361	1.60725075963768	0.107999371169272	0.43214103325689
362	PAS_chr1-1_0472	74.3062529634196	0.431647477279035	0.268935561705346	1.60502194109963	0.108488976151286	0.43214103325689
457	PAS_chr1-1_0193	51.7867793629597	-0.504566310660053	0.314271611253942	-1.60551030570925	0.108381547031715	0.43214103325689
3739	PAS_chr3_1117	29.383237237703	0.588745133091034	0.366729523765962	1.60539333469851	0.108407270326864	0.43214103325689
106	PAS_chr1-3_0119	87.7117683860319	0.40578296320129	0.253587228021073	1.60017113782863	0.1095606230951	0.434793361653331
123	PAS_chr1-3_0137	21.4511238991618	-0.717728331746479	0.448382806668058	-1.60070440050977	0.109442406052705	0.434793361653331
3206	PAS_chr3_0559	43.4266611622009	-0.509378741612356	0.318727877096466	-1.59816187480265	0.110006956149438	0.435757683970878
3636	PAS_chr3_1016	58.853822396957	0.465736245793682	0.291590141817753	1.59722905201909	0.110214659019056	0.435774934091951
4542	PAS_chr4_0783	847.0169822843	0.339990137178115	0.213182639975476	1.59483031647055	0.11075018567405	0.437085907733865
215	PAS_chr1-3_0236	21.1404124493155	-0.694410921812759	0.436278600740931	-1.59166853619096	0.111459201571388	0.438269851316483
507	PAS_chr1-1_0240	35.185952905071	-0.616290388853346	0.387139998124032	-1.5919057494439	0.111405883515421	0.438269851316483
539	PAS_chr1-1_0275	174.774997899949	-0.380262276488177	0.239047065253768	-1.59074229204403	0.111667584882294	0.438285044693694
3269	PAS_chr3_1203	237.840536442105	0.327749805117327	0.206672841643755	1.58583877064154	0.112775888271088	0.441355767118593
4641	PAS_chr4_0884	26.3758125194568	0.663181839571246	0.418289857884402	1.58546000356175	0.112861857387302	0.441355767118593
95	PAS_chr1-3_0106	30.1661723658146	0.560380809091251	0.354926420613345	1.57886473518332	0.114367086272539	0.443198310817452
497	PAS_chr1-1_0231	29.9331823848851	0.581147809195713	0.367292312558425	1.58224876842003	0.113592791161157	0.443198310817452
1786	PAS_chr2-1_0359	62.2642478180633	0.451922245687931	0.28596379594318	1.58034776464405	0.114027246911116	0.443198310817452
3165	PAS_chr3_0516	123.727375887721	-1.10117363454658	0.697086618491093	-1.57967977771567	0.114180219006503	0.443198310817452
3506	PAS_chr3_0881	31.2400692422661	-0.561760519977632	0.355396927708688	-1.5806566578935	0.113956563509056	0.443198310817452
560	PAS_chr1-1_0292	36.9499653465119	0.555050876927213	0.352104922246305	1.57637920363676	0.114938438173726	0.444608435029414
462	PAS_chr1-1_0198	32.3722838470694	0.546728526224406	0.348221228645796	1.57006087294158	0.116400950164929	0.448304464837566
913	PAS_chr1-4_0203	103.540504139838	0.454020232006015	0.29014816539375	1.56478753325867	0.117632735854679	0.448304464837566
1695	PAS_chr2-1_0264	102.680670093209	-0.433636053771225	0.277230033485228	-1.56417415645672	0.117776674616682	0.448304464837566
2021	PAS_chr2-1_0601	29.8440755722939	-0.565063996917436	0.360718555164353	-1.56649550966398	0.11723265898737	0.448304464837566
3194	PAS_chr3_0547	30.6176314443028	-0.587546546192173	0.374953817300825	-1.56698376995262	0.117118485312331	0.448304464837566
3465	PAS_chr3_0843	54.5040816900673	-0.459110072687731	0.293453343497607	-1.56450789490315	0.117698340374837	0.448304464837566
3818	PAS_chr4_0046	36.753988529003	0.584639031434583	0.373459261539188	1.56546936076784	0.117472896088132	0.448304464837566
4369	PAS_chr4_0601	605.237829180478	0.295361289078873	0.188771440371923	1.56465029083289	0.117664930009377	0.448304464837566
4486	PAS_chr4_0727	107.671606219291	0.396206229762796	0.253285254132599	1.56426883641389	0.117754447421771	0.448304464837566
3914	PAS_chr4_0150	21.0947874979656	0.698819666554827	0.447695156562112	1.56092746662957	0.118540865803767	0.4504132542863	KpHOM3
577	PAS_chr1-1_0309	88.7683642622187	-0.384265410118904	0.247076837463687	-1.55524659479818	0.119887351057719	0.453836884320733
929	PAS_chr1-4_0218	68.138260340679	0.444860890146708	0.286349040338968	1.55356165894637	0.120289010869891	0.453836884320733
3582	PAS_chr3_0960	32.535319194231	0.5515102525578	0.354805837061107	1.55440016750011	0.120088993316046	0.453836884320733
4577	PAS_chr4_0816	170.199295351457	0.382380252188766	0.245809745270814	1.55559435516883	0.119804581868605	0.453836884320733
35	PAS_chr1-3_0047	78.8145353063241	-0.427406594431495	0.275424766708559	-1.55180886431959	0.120707964308993	0.454617166105751
3943	PAS_chr4_0180	192.699557620386	-0.398890337948837	0.258615592051852	-1.54240637536216	0.122974873296018	0.462342374514678
502	PAS_chr1-1_0236	85.2208265212355	-0.411026431023921	0.266813367355539	-1.54050164389332	0.123438122404122	0.462461357188868
1381	PAS_FragB_0009	28.0565309798061	0.579542821299186	0.376009620138157	1.54129785585338	0.123244310505114	0.462461357188868
1121	PAS_chr1-4_0409	192.640207756871	-0.413115139128875	0.26858174375315	-1.53813559088574	0.124015465385696	0.463005474427782
4199	PAS_chr4_0433	391.340325073685	0.311608620565985	0.202566126000519	1.53830567192259	0.123973893575236	0.463005474427782
551	PAS_chr1-1_0284	107.795369665661	-0.40146670224636	0.261262506569706	-1.5366410876076	0.124381225062371	0.463017136143617
4443	PAS_chr4_0681	31.7206102210162	0.58010796803454	0.377586561280974	1.53635756014861	0.124450709481439	0.463017136143617
3935	PAS_chr4_0172	61.2312520919186	0.440316587808245	0.287170488516986	1.5332933062939	0.12520360314494	0.465010955874533
373	PAS_chr1-1_0105	54.8939653080151	0.476601865333348	0.312494269674583	1.52515393587747	0.127220706971022	0.470333762178829
998	PAS_chr1-4_0288	63.549023397933	0.443357833686686	0.290497426716573	1.52620227551707	0.126959496949733	0.470333762178829
2661	PAS_chr2-2_0023	105.71029739047	0.392386622987932	0.257327114797276	1.5248553316935	0.127295185284051	0.470333762178829
3201	PAS_chr3_1199	68.1737334523722	0.408744424625047	0.268337458694377	1.52324772923555	0.127696739054194	0.471005355926228
4193	PAS_chr4_0960	131.604218692381	0.348394253705275	0.229185067222326	1.52014377693861	0.128474844232698	0.473061153248578
1633	PAS_chr2-1_0206	28.4418110250018	0.601201751235878	0.396013370918547	1.51813498074926	0.12898037431765	0.474051211165775
2612	PAS_chr2-2_0068	140.952955230575	0.357152980764882	0.23552020256807	1.51644307736894	0.129407353491357	0.474051211165775
4282	PAS_chr4_0514	132.375266745246	-0.370986239503443	0.24457457986883	-1.51686344387225	0.12930116485953	0.474051211165775
370	PAS_chr1-1_0102	22.3281968509621	0.613629171022382	0.405914368025678	1.51172074545428	0.130604918766524	0.477621742178603
2190	PAS_chr2-1_0769	56.2052916626013	-0.434568950721168	0.28859704069734	-1.50579836047908	0.132118944351102	0.482335430569697
3268	PAS_chr3_0627	158.475792674166	0.351075461027463	0.233826351953025	1.50143667766751	0.133242653297927	0.484786088314867
3488	PAS_chr3_0865	44.6536350946019	-0.477344212936031	0.317864558323702	-1.50172203989449	0.133168909439854	0.484786088314867
3761	PAS_chr3_1138	38.1169082371439	0.541041056791848	0.360985002103998	1.49879095707133	0.133927871289703	0.486453268091243
768	PAS_chr1-4_0055	52.111682416328	-0.465867496206538	0.311139501904694	-1.49729460050765	0.134316619225925	0.487039788496035
354	PAS_chr1-1_0087	66.1480252265868	0.438667805691113	0.29371845943619	1.49349757088186	0.135306989637289	0.489802160122823
2328	PAS_chr2-2_0340	45.6529864666537	0.459029709016892	0.307973751823954	1.49048321910007	0.136097225554653	0.490178746829614
2564	PAS_chr2-2_0113	67.6952236299408	-0.45855071204007	0.307571647959649	-1.49087445179677	0.135994460077104	0.490178746829614
4393	PAS_chr4_0628	28.899039548938	0.639627247690138	0.428681272626791	1.49208115337242	0.135677871948675	0.490178746829614
2882	PAS_chr3_1166	207.614734227144	-0.403701051335419	0.271403872120568	-1.48745501742908	0.13689467529341	0.492223639519763
309	PAS_chr1-1_0041	24.0688661774802	-0.589995645623542	0.398711930069229	-1.47975418122327	0.138938860407184	0.494480420646945
757	PAS_chr1-4_0044	57.8575928600056	-0.469488371731422	0.31730756164748	-1.47960032623809	0.138979939395807	0.494480420646945
926	PAS_chr1-4_0213	82.8704276174032	0.526480340558735	0.355579336465235	1.48062692785358	0.138706015655139	0.494480420646945
1124	PAS_chr1-4_0412	109.093630091038	-0.478925546122933	0.323287284845112	-1.48142401069806	0.138493620372906	0.494480420646945
2242	PAS_chr2-2_0432	37.4326942598548	-0.481038740650946	0.325243632782474	-1.47901047757842	0.139137514535748	0.494480420646945
2361	PAS_chr2-2_0492	41.1675840179051	-0.497836741876515	0.335651745217599	-1.48319426003214	0.138022805813537	0.494480420646945
3153	PAS_chr3_0505	315.265177740701	0.312850552453708	0.210844042015805	1.48380077265952	0.137861782079016	0.494480420646945
4290	PAS_chr4_0524	287.137895122112	-0.444131001767416	0.300722953732747	-1.47687762525143	0.139708443642593	0.495687408486881
1280	PAS_chr1-4_0571	33.2308832338978	-0.516134963611788	0.350063802767889	-1.47440255042311	0.140373238176743	0.496886120447713
1290	PAS_chr1-4_0586	706.540306724771	0.71562370159446	0.485785832659342	1.47312591986661	0.140717085497873	0.496886120447713
1531	PAS_chr2-1_0809	431.721282531208	-0.294353206337364	0.199957432715121	-1.47207934379078	0.140999452790552	0.496886120447713
1932	PAS_chr2-1_0507	21.8830520836484	0.616015784427868	0.41842237228184	1.47223433839941	0.140957607632212	0.496886120447713
2901	PAS_chr3_0242	131.522842822934	-0.395843684998321	0.26919736578389	-1.47045898404557	0.141437486455019	0.496886120447713
3559	PAS_chr3_0937	121.970396412873	-0.40713741341386	0.27672940535352	-1.47124738295789	0.141224227254556	0.496886120447713
456	PAS_chr1-1_0192	43.9072321466811	0.46563081212657	0.317412136608616	1.46695969820686	0.142387019045917	0.496963162565798
1585	PAS_chr2-1_0160	42.0576164447495	-0.474536094699711	0.323310701626008	-1.46774014071651	0.142174822730473	0.496963162565798	KpMET6
4070	PAS_chr4_0300	129.210051770018	0.346500806785912	0.235934256294325	1.46863288200784	0.141932391108055	0.496963162565798
4355	PAS_chr4_0587	57.7226979930734	-0.419418432544793	0.285831501767477	-1.46736251935585	0.142277464730224	0.496963162565798
715	PAS_chr1-1_0455	39.3769812581578	-0.469114336751817	0.320528431399974	-1.463565446294	0.143312719465358	0.498570061386788
1138	PAS_chr1-4_0425	83.9073101076667	-0.385789540741451	0.263505505221197	-1.46406634054042	0.143175822965037	0.498570061386788
1130	PAS_chr1-4_0418	68.6248425538912	0.396314495983723	0.27127155513082	1.46095117047049	0.144028842291879	0.498632970971722
2321	PAS_chr2-2_0347	64.8704114328478	0.414759355885824	0.283813332784479	1.46138080201039	0.143910966248344	0.498632970971722
4492	PAS_chr4_0732	36.81489601877	0.482261412960949	0.330017301851747	1.46132160421575	0.14392720368152	0.498632970971722
345	PAS_chr1-1_0079	82.309333811213	0.374035056779721	0.2566927519745	1.45713135218121	0.145080125462939	0.49930304148011
1836	PAS_chr2-1_0412	24.921234649708	-0.565094245367173	0.38777376558704	-1.45727817484427	0.145039608882992	0.49930304148011
2550	PAS_chr2-2_0130	23.0996017518583	0.583062531847134	0.400056114804895	1.45745186804978	0.144991688411057	0.49930304148011
2956	PAS_chr3_0294	57.730331866523	0.423148909052816	0.290452209126886	1.45686242265061	0.145154360635608	0.49930304148011
1538	PAS_chr2-1_0110	21.8405053585276	-0.591894199707461	0.407023586331345	-1.45420122957105	0.145890524220697	0.501031079174605
3692	PAS_chr3_1072	32.1752753184865	0.533074404358206	0.367469805692335	1.4506617852693	0.146874061558729	0.503601782272569
2429	PAS_chr2-2_0480	504.655162551134	-0.316983883492533	0.219183943137258	-1.44620029622348	0.148121030668992	0.507066084223083
318	PAS_chr1-1_0050	161.879744344135	-0.319584548974711	0.221122045249671	-1.4452857860186	0.148377628716128	0.507134383315252
1187	PAS_chr1-4_0683	91.0112943064375	0.360840237416708	0.249941378819127	1.44369947513907	0.148823529147567	0.507364737034159
3410	PAS_chr3_1220	153.252994128542	0.336253324468327	0.232965350492079	1.4433619581542	0.148918534575122	0.507364737034159
4499	PAS_chr4_0741	20.7944297812899	-0.62589429327536	0.434134328564801	-1.44170652282785	0.149385182723258	0.508146740596733
3719	PAS_chr3_1098	24.2546057507004	0.570536922477573	0.396446833174952	1.43912594258457	0.150114842989412	0.509819506380838
1134	PAS_chr1-4_0422	130.056953363153	-0.368110070857785	0.25622783383467	-1.4366513791601	0.150817076710392	0.511146716414965
1271	PAS_chr1-4_0562	23.0229976474071	-0.583162433180595	0.406082427222077	-1.43606911820806	0.150982674517346	0.511146716414965
2500	PAS_chr2-2_0177	614.487386911362	-0.274055987208568	0.19130091470503	-1.43259109676052	0.151974727596605	0.511560021941905
3402	PAS_chr3_0773	23.1487755001107	-0.566265712002723	0.395040498352566	-1.43343711433186	0.151732958265407	0.511560021941905
3849	PAS_chr4_0080	8397.01797153349	-0.405324405092605	0.282595758662403	-1.4342904755935	0.151489387147574	0.511560021941905
4200	PAS_chr4_0434	145.881107463898	0.390365551904799	0.272545624064126	1.43229432960168	0.152059605215583	0.511560021941905
1647	PAS_chr2-1_0218	2919.7253337176	0.3450405579395	0.242212904403922	1.42453416670195	0.154291901884459	0.5159754203794
2134	PAS_chr2-1_0717	45.0986889155611	0.441660294077953	0.310433263123908	1.42272219682098	0.154816703361621	0.5159754203794
3297	PAS_chr3_1206	73.2018866719681	-0.492296241298542	0.345897173047068	-1.42324447743189	0.154665296163689	0.5159754203794
3473	PAS_chr3_0850	23.7629288613151	-0.568461458195009	0.398613747600904	-1.42609596787956	0.153840642517649	0.5159754203794
3924	PAS_chr4_0161	61.2720942357782	0.401455539577101	0.282136623661883	1.42291183032733	0.154761716305337	0.5159754203794
3929	PAS_chr4_0165	112.989617613816	0.346671533350415	0.243219649345444	1.42534344689412	0.154057946934599	0.5159754203794
839	PAS_chr1-4_0131	42.7065968589578	-0.55174518766736	0.388512644652233	-1.42014731119302	0.155564799087155	0.516861030145384
2230	PAS_chr2-2_0444	39.4514363010969	-0.485162972234343	0.341450381724061	-1.42088865089166	0.155349132862485	0.516861030145384
1829	PAS_chr2-1_0405	55.9887643107492	0.419745524606106	0.296693917429589	1.41474260154228	0.157143978738906	0.518889902060824
1914	PAS_chr2-1_0851	41.3266598479148	-0.498718011644783	0.352405223478843	-1.41518336964924	0.157014739218152	0.518889902060824
2305	PAS_chr2-2_0494	27.7412912379982	-0.538694336883274	0.380379684431921	-1.41620165043196	0.156716472824288	0.518889902060824
2532	PAS_chr2-2_0150	99.6927073956832	-0.438120220376466	0.309428953875098	-1.41589923919439	0.156805007742029	0.518889902060824
3852	PAS_chr4_0083	24.2966913355399	0.561115488938174	0.397021992064455	1.41331084965963	0.157564345263603	0.519310347073984
4186	PAS_chr4_0419	38.9350301406624	0.49152858331456	0.34794563235433	1.41265915593966	0.157755966376651	0.519310347073984
104	PAS_chr1-3_0117	75.4713956938531	0.435429503320579	0.308719901547642	1.41043548257734	0.15841113438871	0.520667271464733
755	PAS_chr1-4_0042	637.800966088053	-0.27092911084869	0.192419842455706	-1.40801025191077	0.159128034318753	0.521424124686679
1831	PAS_chr2-1_0407	38.7091138878961	0.498523906738854	0.353884276869152	1.40872013628111	0.158917938331987	0.521424124686679
231	PAS_chr1-3_0253	59.4847876034912	0.416566726930179	0.29633580786432	1.40572524775983	0.159805726752564	0.522845301420983
282	PAS_chr1-1_0019	35.3248322055476	0.4835632345941	0.34445190277557	1.40386286357422	0.160359690022456	0.523857950789823
470	PAS_chr1-1_0204	105.395202974926	0.351334160079044	0.252089826801701	1.39368638765185	0.163412328596646	0.528193997258841
979	PAS_chr1-4_0273	51.1887439175171	-0.41463923291885	0.296663346387983	-1.39767597840205	0.162210390961582	0.528193997258841
1380	PAS_FragB_0007	37.2743500298083	0.460012521641173	0.329877012756112	1.39449705148529	0.163167559263087	0.528193997258841
1490	PAS_chr2-1_0062	23.8175981017706	-0.547839465195424	0.391925134640732	-1.3978166154044	0.162168143536282	0.528193997258841
1663	PAS_chr2-1_0234	29.1596446660442	0.521926783105179	0.374013556313517	1.39547557647262	0.162872474809158	0.528193997258841
2229	PAS_chr2-2_0445	89.5056136603747	-0.36098132342099	0.258549711436512	-1.3961776302722	0.16266101123612	0.528193997258841
2871	PAS_chr3_0218	36.0556948748508	-0.488056785857261	0.350101300782924	-1.3940444801714	0.163304173138874	0.528193997258841
1241	PAS_chr1-4_0532	25.6893893037452	-0.534896845005273	0.384412257698173	-1.39146667228613	0.16408395913639	0.528210522592367
3290	PAS_chr3_0649	139.837359367867	0.31446500653893	0.226005352027495	1.39140513141774	0.16410260945433	0.528210522592367
4436	PAS_chr4_0675	52.91349511799	-0.409000885944441	0.293985928797731	-1.3912260617951	0.164156886629266	0.528210522592367
3226	PAS_chr3_0581	80.9280314206575	0.398775789322497	0.288095711344036	1.38417815198328	0.16630391146581	0.534316765024333
1744	PAS_chr2-1_0314	28.2892803993654	0.549329267816828	0.397707888655938	1.38123804803897	0.167205779626252	0.535608349385736
1781	PAS_chr2-1_0354	62.5488177801039	0.390835209115742	0.282821052215829	1.38191696146256	0.1669971993307	0.535608349385736
540	PAS_chr1-1_0488	24.7100349205039	-0.548925998106586	0.398991786593222	-1.37578270167808	0.168888918535382	0.536133266591373
999	PAS_chr1-4_0289	77.5818747890713	0.354785309494346	0.257758009237622	1.37642787723145	0.168689202160481	0.536133266591373
1580	PAS_chr2-1_0154	32.8430022499309	-0.48073606489268	0.348458076755545	-1.37960947660838	0.167706918047181	0.536133266591373
1718	PAS_chr2-1_0287	42.6319090158517	-0.450808355007994	0.327359312162131	-1.37710563976479	0.168479589303396	0.536133266591373
2281	PAS_chr2-2_0392	688.620368337954	-0.268094803059734	0.194957465803384	-1.3751450961622	0.169086465820161	0.536133266591373
2613	PAS_chr2-2_0067	99.6199101703594	0.462261360125398	0.336181763809443	1.37503401400268	0.16912089977404	0.536133266591373
3951	PAS_chr4_0189	31.1910673507883	1.8175089625599	1.31994182116802	1.37696141861129	0.168524176461716	0.536133266591373
4239	PAS_chr4_0966	23.6602011685002	0.563606408459996	0.410602774276472	1.37263175937653	0.169866853421405	0.536909538174145
4613	PAS_chr4_0855	69.5372316004444	0.392642577349439	0.285898299893991	1.37336450582262	0.169639058339651	0.536909538174145
799	PAS_chr1-4_0089	76.8360554509129	-0.402282732197562	0.293393148695513	-1.37113880806759	0.170331689255146	0.537585876397316
304	PAS_chr1-1_0036	55.6990958171241	0.421217470303057	0.307567956216836	1.36951025550301	0.170839831280137	0.538396703578431
3187	PAS_chr3_0537	35.5226997824927	-0.483536154366714	0.353297087625012	-1.36863894807969	0.171112163008127	0.538463091521904
587	PAS_chr1-1_0322	110.419153170428	0.331422303995619	0.242644223585394	1.3658775762242	0.171977392024047	0.539601099718203
1264	PAS_chr1-4_0555	23.8031462294892	-0.536311983121496	0.392445724676036	-1.36658893039087	0.17175418885137	0.539601099718203
1097	PAS_chr1-4_0384	98.290552044087	-0.33492473559652	0.24632025473252	-1.3597125253066	0.173920912924748	0.540219598450056
2064	PAS_chr2-1_0639	129.1506000282	-0.314825539558928	0.230852373840319	-1.36375266288877	0.172645423272509	0.540219598450056
2169	PAS_chr2-1_0751	98.1912372864094	0.370108383489953	0.27203535458091	1.36051574641881	0.173666773388209	0.540219598450056
2195	PAS_chr2-1_0773	78.8083502601283	-0.375973055567835	0.276468633298743	-1.35991215741849	0.173857723302731	0.540219598450056
2461	PAS_chr2-2_0213	25.0277942484555	0.536152671044829	0.394329928380041	1.35965503112436	0.173939114759934	0.540219598450056
4269	PAS_chr4_0501	72.0723865113954	0.366190006939229	0.269298144657524	1.35979402087945	0.173895115030672	0.540219598450056
4667	PAS_FragD_0026	498.350072659609	0.312405660448233	0.229385919949314	1.36192169300218	0.173222599291228	0.540219598450056
3603	PAS_chr3_0978	44.1120586159134	0.480521365952363	0.354190093030429	1.35667647234583	0.174884031375521	0.540944258263919
3770	PAS_c131_0004	73.1567145486233	0.357184334374402	0.263306820255137	1.35653278569959	0.174929711141808	0.540944258263919
4127	PAS_chr4_0356	24.6866725330345	0.532835163791717	0.392690914271458	1.35688182340623	0.174818763182665	0.540944258263919
474	PAS_chr1-1_0484	113.042609612091	0.325522439547146	0.240204870478812	1.35518667418469	0.175358089261545	0.541487586869585
3696	PAS_chr3_1250	45.6610088042822	0.44288030672742	0.32709041233882	1.35399965887309	0.175736486548326	0.541875238378507
2304	PAS_chr2-2_0365	23.1218233682697	-0.538421242230084	0.398440433134486	-1.3513217973246	0.17659237255535	0.543731974692695
4197	PAS_chr4_0431	82.8237937919165	0.346859931647747	0.257171126168494	1.34875145905956	0.177416810780296	0.545486693690351
771	PAS_chr1-4_0059	134.491045097398	0.304145232547144	0.22568422377273	1.34765836735414	0.17776828832718	0.545784300695052
1751	PAS_chr2-1_0827	55.0279117730535	-0.38765315540996	0.288566341789546	-1.34337619906025	0.179150189729873	0.548646099749984
3778	PAS_c131_0012	108.529979042009	-0.32793794439934	0.244149705098154	-1.34318386445522	0.179212445088655	0.548646099749984
1754	PAS_chr2-1_0828	390.637031728578	-0.412740388469561	0.308232440199265	-1.33905564321112	0.180552559162495	0.550389949196623
3323	PAS_chr3_0686	53.1971406031671	0.399960529121519	0.298382633950245	1.34042830786262	0.180106137668246	0.550389949196623
4449	PAS_chr4_0688	121.430566477409	0.330928052152158	0.247119450730068	1.33914206742728	0.180524427838411	0.550389949196623
86	PAS_chr1-3_0098	33.1136634323291	0.469773556052917	0.352499747693541	1.33269189304876	0.182632934775872	0.551766201085879
109	PAS_chr1-3_0122	43.2865309786179	-0.427386004112609	0.319852319674602	-1.33619791955051	0.181484590908943	0.551766201085879
604	PAS_chr1-1_0337	133.452087046521	-0.426910607065187	0.320361934889737	-1.33258842756123	0.182666904914146	0.551766201085879
1041	PAS_chr1-4_0328	47.6475439329569	-0.410452273787436	0.30764006190019	-1.33419643479529	0.182139487658385	0.551766201085879
1430	PAS_FragB_0061	1923.69451596643	-0.299356879134263	0.224699995709193	-1.33225137895281	0.182777598335506	0.551766201085879
2964	PAS_chr3_0303	84.0246435993225	-0.341050661358145	0.255659814612688	-1.33400183315794	0.182203255753108	0.551766201085879
3986	PAS_chr4_0221	93.9311934788117	-0.361213768975274	0.271148150965267	-1.33216386572942	0.182806347536619	0.551766201085879
2354	PAS_chr2-2_0312	36.3920542458704	0.443718179942304	0.333865000011967	1.32903472938583	0.183836512300398	0.553692187770747
2863	PAS_chr3_0212	42.455615960144	-0.465906938515484	0.350660085191295	-1.32865689079303	0.183961193510393	0.553692187770747
749	PAS_chr1-4_0036	30.0836679614448	-0.500024291108757	0.376587420292827	-1.32777746723443	0.184251632890579	0.553788568421474
62	PAS_chr1-3_0073	23.185650083746	0.617046912964221	0.465012620167505	1.32694659500198	0.184526349407909	0.553837488489004
1630	PAS_chr2-1_0203	49.7142181130159	0.456985204140836	0.344852501244169	1.32516134432	0.185117643378133	0.554084361137825
2762	PAS_chr3_0104	41.8127660762768	0.425148497345679	0.320833615032621	1.3251370100432	0.185125712820664	0.554084361137825
1690	PAS_chr2-1_0259	26.902196405906	-0.506619870138896	0.383021236562664	-1.32269394429781	0.185937178198671	0.555736921729081
4679	PAS_FragD_0015	26.358799971854	-0.519334086574396	0.393471920100789	-1.31987585401613	0.186876470509795	0.557766401535503
3079	PAS_chr3_1189	32.9661622640862	0.486982608236138	0.369512831745298	1.31790445797512	0.187535633192044	0.558178974903542
3502	PAS_chr3_0877	24.3864401997026	-0.53342884547991	0.404617387337248	-1.31835373904804	0.187385259243376	0.558178974903542
789	PAS_chr1-4_0079	20.7161108879119	0.558443181586938	0.425357090196976	1.31288085812401	0.189223097970186	0.561918447084012
2668	PAS_chr2-2_0016	174.154519779025	0.296392097216843	0.225804664709582	1.31260396058711	0.189316434341884	0.561918447084012
486	PAS_chr1-1_0218	113.573975263068	0.360051663294858	0.274536598879544	1.31148875874592	0.189692689133355	0.562256476919474
2619	PAS_chr2-2_0062	104.186448901935	0.322726120583199	0.246305834748812	1.31026583642373	0.190105920508708	0.562444629139736
4649	PAS_chr4_0893	20.6095055507892	-0.571318733295393	0.436205063116425	-1.30974805568203	0.190281080786892	0.562444629139736
1320	PAS_chr1-4_0616	72.8827857995254	0.346260014658987	0.264643171907864	1.3084033574822	0.190736534447479	0.562837392286436
1702	PAS_chr2-1_0821	22.2588006436094	-0.548579296835303	0.419465458024005	-1.30780565203037	0.190939236673933	0.562837392286436
4011	PAS_chr4_0246	449.366563675111	-0.279058024560672	0.213540643160672	-1.30681457370485	0.191275694354905	0.563054688190332
582	PAS_chr1-1_0314	33.5078439272708	-0.493436371775825	0.378983808421976	-1.30199855722177	0.192916878813212	0.567106819337055
3743	PAS_chr3_1121	124.222084358928	-0.314626364349564	0.242172450966301	-1.29918313620795	0.193881087441638	0.569160507380041
611	PAS_chr1-1_0345	467.946337961395	-0.25490608481346	0.196770947324201	-1.29544573667918	0.195166509002916	0.569811755849112
908	PAS_chr1-4_0198	114.757479575664	0.316233432374264	0.243990784796277	1.29608760690822	0.194945304157853	0.569811755849112
2991	PAS_chr3_0339	21.6665056070068	-0.540422061308609	0.416938146662882	-1.29616842602212	0.194917464870817	0.569811755849112
3100	PAS_chr3_0450	176.85389984509	-0.342576580479484	0.264379047721826	-1.2957781012962	0.195051944714251	0.569811755849112
4477	PAS_chr4_0718	26.2828262757218	0.483848152093167	0.373978390139804	1.29378639207546	0.195739214337523	0.570706307925594
4331	PAS_chr4_0977	32.9724089872784	0.457718755950865	0.354054870105213	1.29279045311493	0.196083543192416	0.570933468833353
2700	PAS_chr3_0040	53.1318181762209	-0.476108457792593	0.369423120450739	-1.28878901031339	0.19747144764634	0.574194453603943
1162	PAS_chr1-4_0450	31.5237000646887	0.482034568808457	0.374284233558451	1.28788371400416	0.197786445455101	0.574331101097943
2947	PAS_chr3_0287	24.3561511669141	0.599801807487156	0.466065860568884	1.28694645592585	0.198112951527061	0.574500751180637
1951	PAS_chr2-1_0858	26.4132767032181	-0.562666989661166	0.438872902861636	-1.28207275043034	0.199817126931702	0.578158023895703
2396	PAS_chr2-2_0276	61.1948262943628	-0.438925156108454	0.343045837657448	-1.27949418977282	0.200723084357631	0.578158023895703
2605	PAS_chr2-2_0074	22.1614551918349	0.523619965803459	0.409004476261885	1.2802304038066	0.200464116022611	0.578158023895703
2959	PAS_chr3_0298	52.711980046764	-0.398755078805211	0.31118113211622	-1.28142434630736	0.200044657168039	0.578158023895703
3866	PAS_chr4_0100	54.2516269456711	-0.406284692091786	0.317187076809735	-1.28089926039293	0.200229052642209	0.578158023895703
3855	PAS_chr4_0918	107.949512203869	0.345103949794552	0.270305815173543	1.27671670538418	0.201702281491049	0.580198643268884
2720	PAS_chr3_0061	40.3672114923006	0.418596564139224	0.32830805732016	1.27501154725245	0.202305154888558	0.581152743868873
226	PAS_chr1-3_0248	27.316257766754	-0.485675953751414	0.381530552518092	-1.27296739552302	0.203029611845594	0.581216790316534
1775	PAS_chr2-1_0346	96.7989302928772	-0.351191369327882	0.275910465478233	-1.27284540917709	0.203072904042686	0.581216790316534
4103	PAS_chr4_0333	67.017454144791	0.358519220990194	0.281710049108993	1.27265329058774	0.203141099368681	0.581216790316534
2368	PAS_chr2-2_0299	59.8004748009634	0.354856293811296	0.279278816207219	1.27061657819403	0.203865086245279	0.582510506431509
122	PAS_chr1-3_0136	102.187524228008	-0.345514696657513	0.272361175937321	-1.26859011923574	0.204587290221022	0.582754907614491
1865	PAS_chr2-1_0437	1083.86308125498	-0.26598109773427	0.209617839480194	-1.26888578946259	0.204481801357749	0.582754907614491
4180	PAS_chr4_0413	196.142639962572	-0.285828988078009	0.225401488773241	-1.2680882882968	0.204766423440836	0.582754907614491
185	PAS_chr1-3_0202	59.9630810473385	-0.353662011541266	0.279673824833113	-1.26455170322894	0.206032075419447	0.583198806824065
713	PAS_chr1-1_0453	27.3418549006015	-0.502033667619638	0.397521069724108	-1.26291083883444	0.206621224231288	0.583198806824065
948	PAS_chr1-4_0239	235.353681794473	-0.280060787059126	0.221808775181724	-1.2626226659864	0.20672481820723	0.583198806824065
1452	PAS_chr2-1_0023	82.1118593435599	-0.328566563707922	0.259744018907694	-1.26496296272634	0.205884605017379	0.583198806824065
1601	PAS_chr2-1_0175	52.8806284288589	0.398495147000703	0.314990406924398	1.26510248642698	0.205834591704145	0.583198806824065
3969	PAS_chr4_0206	49.618655690646	0.41777996326064	0.33020206800007	1.26522515679869	0.205790626884828	0.583198806824065
4630	PAS_chr4_0873	21.7865285488209	-0.51510624566524	0.408057487245142	-1.26233744451744	0.206827388327713	0.583198806824065
1468	PAS_chr2-1_0039	28.3823950531754	-0.497755660059608	0.39494361488898	-1.26032081870605	0.207553652746486	0.584477631847199
1858	PAS_chr2-1_0434	37.9552716726145	0.412620919084812	0.328166449619939	1.25735254034251	0.208626006581647	0.585190487047734
2656	PAS_chr2-2_0450	84.0421852084792	0.37480059873077	0.297810328982102	1.25852115341941	0.208203341944161	0.585190487047734
3489	PAS_chr3_0866	58.4564512549483	-0.408873455296798	0.325022465974225	-1.25798521056456	0.208397104924376	0.585190487047734
3716	PAS_chr3_1093	30.2627156504837	0.465272129197492	0.370486344397551	1.25584150734104	0.209173439245168	0.585959059218816
1084	PAS_chr1-4_0674	73.973207501702	0.333557718697912	0.265866313501412	1.25460692746297	0.209621487427922	0.586447581668455
207	PAS_chr1-3_0228	46.5351852986799	0.43143360368883	0.344945884290799	1.25072837026552	0.211033596119306	0.586589768958728
1133	PAS_chr1-4_0421	1357.70109475101	0.25154368715022	0.200857773279284	1.2523472855614	0.21044334570648	0.586589768958728
2093	PAS_chr2-1_0668	55.0834291198988	0.387540544256174	0.309856863754067	1.25070827723786	0.211040929476052	0.586589768958728
3965	PAS_chr4_0202	29.6402633319918	0.44374526706926	0.354226968930876	1.2527145191925	0.210309620090015	0.586589768958728
4164	PAS_chr4_0395	40.9495084396232	-0.424138917637242	0.338921681024148	-1.25143636829484	0.210775315562898	0.586589768958728
453	PAS_chr1-1_0189	98.8022537500052	-0.32946888919606	0.266950442057361	-1.23419495640043	0.217130266381025	0.598530010548384
707	PAS_chr1-1_0446	29.5059673650304	0.533150841572942	0.43237426371483	1.23307718871209	0.217546967212876	0.598530010548384
754	PAS_chr1-4_0041	241.451229009747	-0.338053748763568	0.27433544125009	-1.23226422084994	0.21785040047958	0.598530010548384
947	PAS_chr1-4_0238	44.0291357781758	0.386007948575626	0.31324155605274	1.23230121009434	0.217836587958846	0.598530010548384
1031	PAS_chr1-4_0318	25.5176367541734	0.484040204992972	0.391469644437868	1.23646931983202	0.21628416304653	0.598530010548384
1735	PAS_chr2-1_0304	59.060502195831	0.353282772131485	0.285479274474191	1.2375076011461	0.215898694157062	0.598530010548384
3654	PAS_chr3_1034	47.3054624255983	-0.39498060200832	0.320042694208969	-1.23414972175688	0.217147118580985	0.598530010548384
3878	PAS_chr4_0113	133.974523118871	-0.319626845526507	0.258957647146491	-1.23428232009575	0.217097721634765	0.598530010548384
4006	PAS_chr4_0242	67.8230520782772	0.354679411198818	0.287392603279414	1.23412853062883	0.217155013675046	0.598530010548384
1908	PAS_chr2-1_0483	213.504773924473	-0.317281633386482	0.257950995281531	-1.23000740136783	0.218694333267597	0.599236191317506
2408	PAS_chr2-2_0265	144.032521095625	0.310721200390804	0.252860865672542	1.2288228135436	0.219138246042162	0.599236191317506
2911	PAS_chr3_0252	83.9476222677088	-0.337180067061659	0.274444961234654	-1.22858902398782	0.219225932801178	0.599236191317506
4680	PAS_FragD_0014	348.901120823014	-0.337150414038183	0.27404552960695	-1.23027153379127	0.218595440344958	0.599236191317506
2533	PAS_chr2-2_0149	184.315293957239	0.27822470696493	0.226785343497735	1.22681961132867	0.219890398134511	0.600286781149373
52	PAS_chr1-3_0063	31.0895866089781	-0.446120420089889	0.364368602443218	-1.22436570302298	0.220814301378626	0.601277062076741
1516	PAS_chr2-1_0091	24.8623807245063	-0.487853933531984	0.398410587415363	-1.22450042479261	0.220763506162989	0.601277062076741
634	PAS_chr1-1_0370	35.2493253465927	-0.430715850838269	0.352272397279704	-1.22267839934186	0.221451188655358	0.601369101616777
769	PAS_chr1-4_0057	43.0710405953461	-0.383130691315588	0.313515586230588	-1.22204671200557	0.221689962798532	0.601369101616777
4126	PAS_chr4_0355	39.4066887268112	0.411448282855666	0.336342533399598	1.22330137285027	0.221215888837914	0.601369101616777
652	PAS_chr1-1_0390	76.0574345676748	0.321984141915265	0.264248703190183	1.21848901443248	0.223038196899437	0.602632410930438
2549	PAS_chr2-2_0131	1306.9191128741	-0.259549457029684	0.212888754671852	-1.21917880270264	0.222776335513013	0.602632410930438	CAT1
3776	PAS_c131_0010	79.8234952671255	-0.336282891334618	0.276128053992792	-1.21785123413573	0.223280510629383	0.602632410930438
3881	PAS_chr4_0115	60.9452395174363	0.344023414401838	0.282441122214898	1.21803585718684	0.223210346893637	0.602632410930438
1639	PAS_chr2-1_0212	21.2136446895642	-0.54750380948059	0.45036596194228	-1.21568647665864	0.224104377648063	0.603336283039949
3376	PAS_chr3_0744	89.3930671813657	-0.326978011987359	0.268916536877821	-1.21590890535645	0.224019625319074	0.603336283039949
2163	PAS_chr2-1_0882	26.2477314126587	-0.475608907087731	0.391909350804673	-1.21356866354734	0.224912479377315	0.60475212459923
867	PAS_chr1-4_0158	197.392641952564	0.300859739570984	0.249087721646936	1.20784652724646	0.227106301001542	0.605230785696706
1383	PAS_FragB_0011	55.5128205873474	0.361619189188463	0.299309329628393	1.20817880831657	0.226978491286809	0.605230785696706
1470	PAS_chr2-1_0041	933.702270579104	-0.330557596174785	0.273453356632109	-1.20882625192823	0.226729603739733	0.605230785696706
3214	PAS_chr3_0567	470.095559708863	-0.35630666018429	0.295147971806536	-1.20721364949051	0.227349875168385	0.605230785696706
3240	PAS_chr3_0596	105.332968463025	-0.3423975709035	0.283195895550859	-1.20904849357893	0.22664421543289	0.605230785696706
3706	PAS_chr3_1083	96.8077243484069	-0.311233442974123	0.256971622869677	-1.21115880227742	0.22583454861061	0.605230785696706
3889	PAS_chr4_0122	22.6678604346853	-0.503040861212016	0.415158088899065	-1.21168507771582	0.225632953392297	0.605230785696706
4267	PAS_chr4_0499	38.6127249886041	-0.418147136280861	0.346336298536262	-1.20734424329213	0.227299598597782	0.605230785696706
896	PAS_chr1-4_0186	21.9596409325153	-0.496682252222972	0.412092427907187	-1.2052690575883	0.228099450658178	0.606472857022921
36	PAS_chr1-3_0048	24.4850148513138	0.472130290494968	0.39212836902017	1.20401972362954	0.228581955269599	0.606936034097557
3976	PAS_chr4_0213	57.0871207261604	-0.350009693403187	0.290862242341802	-1.20335211124406	0.228840091250969	0.606936034097557
690	PAS_chr1-1_0428	474.291385586894	0.228904564704762	0.190358693164074	1.20249073420285	0.229173453924133	0.607068864968378
100	PAS_chr1-3_0113	29.7421821501106	0.47926874118197	0.399185613388044	1.20061626749078	0.229900087829934	0.607491847373057
2891	PAS_chr3_0232	110.523494323133	0.304877560748823	0.253882851715724	1.20085921001943	0.229805819244714	0.607491847373057
443	PAS_chr1-1_0176	160.000527615057	0.270867425587618	0.226355923387708	1.19664385863528	0.231445397920004	0.60821815029535
2937	PAS_chr3_0277	410.503125342608	-0.223096619849475	0.186321556863213	-1.19737417186386	0.231160746060479	0.60821815029535
3075	PAS_chr3_0420	55.9412157108098	-0.371055763936166	0.309540638120405	-1.19873037087891	0.230632804666003	0.60821815029535
3661	PAS_chr3_1041	30.2240551408429	0.456149205713834	0.380992095918958	1.1972668477901	0.231202561825825	0.60821815029535
4188	PAS_chr4_0422	36.2381367745057	-0.405030787047769	0.338580115384664	-1.19626277103607	0.231594032030334	0.60821815029535
2188	PAS_chr2-1_0767	134.892610222499	0.388543675911375	0.325072645586123	1.19525183428095	0.231988652143192	0.608508790138141
3972	PAS_chr4_0210	1673.90738017592	0.2126378360267	0.178528972639966	1.19105505892044	0.233631970923847	0.612070065635457
1239	PAS_chr1-4_0530	37.4483863729657	-0.4287645756671	0.361125422015316	-1.18730100272175	0.235108912732522	0.615187301569958
388	PAS_chr1-1_0120	148.557504389751	-0.276488023292717	0.233749042521388	-1.18284130839774	0.236872045815234	0.616691350263463
1286	PAS_chr1-4_0579	24.9456161776632	-0.453564688324556	0.383624048067763	-1.18231557851774	0.237080506468313	0.616691350263463
2095	PAS_chr2-1_0670	233.849139348091	0.24468992052662	0.206976779008214	1.18220952948982	0.237122572383151	0.616691350263463
2381	PAS_chr2-2_0289	58.3045643994732	-0.347083142981735	0.293282325838879	-1.18344377551211	0.236633316915345	0.616691350263463
3525	PAS_chr3_0903	22.8469882673328	0.489784784010397	0.413346967623184	1.18492410099618	0.236047457328176	0.616691350263463
2182	PAS_chr2-1_0761	40.8181219499399	0.389474213779135	0.330251603206465	1.17932573225283	0.238268495577805	0.618920467906953
18	PAS_chr1-3_0027	253.301843331761	0.245399037702578	0.208928557255962	1.17455957637201	0.240170963769043	0.623106991957698
3380	PAS_chr3_0748	128.848427219683	0.27628266824673	0.235901274542788	1.17117920953249	0.241526750305647	0.625866778603388
1752	PAS_chr2-1_0322	287.66320182962	-0.347317119155238	0.296844703176979	-1.17002970050696	0.241989016761251	0.626307322366377
1451	PAS_chr2-1_0022	74.1767737776205	-0.319007723411943	0.274058251098517	-1.1640143003659	0.244418216528878	0.629643449670562
2220	PAS_chr2-1_0796	25.825317086505	-0.446462145405346	0.383175312443954	-1.1651641713495	0.243952545401503	0.629643449670562
2702	PAS_chr3_0043	53.6722858053317	-0.364010463969369	0.31294164248498	-1.16318960007644	0.244752585117394	0.629643449670562
2832	PAS_chr3_0178	22.0164164247486	0.500580241759633	0.431712557025483	1.15952207924794	0.246243442024189	0.629643449670562
2904	PAS_chr3_0245	82.1076695182079	-0.34403140583399	0.295499071374356	-1.1642385346049	0.24432735790584	0.629643449670562
2915	PAS_chr3_0256	32.0800769331131	0.427787782331713	0.368113050467477	1.1621097969454	0.245190868424497	0.629643449670562
3331	PAS_chr3_1209	948.05662279586	-0.23458616739465	0.202322349047075	-1.15946739695113	0.246265718576048	0.629643449670562
3677	PAS_chr3_1058	147.500203332661	0.273775125981844	0.235940362577912	1.16035731652925	0.245903357407338	0.629643449670562
3967	PAS_chr4_0204	23.4538243125583	-0.477606705310118	0.411910650652016	-1.15949103174223	0.246256090027924	0.629643449670562
4066	PAS_chr4_0297	36.9016160963487	-0.377785833713247	0.325931941702197	-1.15909423218921	0.246417776676696	0.629643449670562
4090	PAS_chr4_0316	88.5504756393907	-0.288135595582046	0.248635373028954	-1.15886807284051	0.24650996466337	0.629643449670562
328	PAS_chr1-1_0061	26.6031736353356	0.44777460834838	0.387171936381293	1.15652650998807	0.247465862543014	0.630038106640618
1644	PAS_chr2-1_0215	21.6709400956009	-0.487885690174196	0.422188657899852	-1.15561060451304	0.247840468454522	0.630038106640618
3765	PAS_chr3_1142	35.7777904764865	0.387414214668588	0.335119287657722	1.1560486935156	0.247661240290552	0.630038106640618
4021	PAS_chr4_0255	137.494206289099	0.268450479741317	0.232013505383625	1.15704678181317	0.247253247675638	0.630038106640618
2416	PAS_chr2-2_0257	53.7906359249617	-0.348773149772891	0.302364133433615	-1.15348717393251	0.248710479057817	0.630776245214362
3435	PAS_chr3_0808	156.246188654449	0.249454719862633	0.216278833890956	1.15339404866777	0.248748683108359	0.630776245214362
4028	PAS_chr4_0937	32.1033469711479	0.397556689499769	0.34487738200789	1.15274793372989	0.249013860686585	0.630776245214362
1949	PAS_chr2-1_0522	43.3043017423525	0.399321083745851	0.347587218783256	1.14883707503311	0.250623168449155	0.632161830110676
2877	PAS_chr3_0223	282.327795997078	0.244078186775433	0.212620182714249	1.14795398846713	0.250987558820259	0.632161830110676
2896	PAS_chr3_0238	40.8002594506595	0.386181362627459	0.336442659203161	1.14783708921485	0.251035822969617	0.632161830110676
3470	PAS_chr3_0848	148.492765206771	0.37623015235443	0.32743747271599	1.14901373148809	0.250550318577502	0.632161830110676
3687	PAS_chr3_1068	60.3920645298664	0.32090455621077	0.278993823980404	1.15022100357788	0.250052857536886	0.632161830110676
3850	PAS_chr4_0081	76.7881145768397	-0.316772197805949	0.276144926997284	-1.14712300258576	0.25133078826612	0.632161830110676
1827	PAS_chr2-1_0402	35.3031970431978	-0.432683217804606	0.378651591052203	-1.14269483617449	0.253165314527868	0.633060990703876
2207	PAS_chr2-1_0890	36.3638859486155	0.380811147746629	0.33301019121587	1.14354202301206	0.252813617516323	0.633060990703876
3305	PAS_chr3_1207	42.6152840004954	-0.384056059453964	0.335363630562176	-1.14519293225137	0.25212924547499	0.633060990703876
3468	PAS_chr3_0846	74.3751790834957	0.33349565552597	0.291831756098826	1.14276684615856	0.253135407409133	0.633060990703876
3821	PAS_chr4_0049	31.7031756131715	-0.416585138459675	0.364040981302437	-1.14433582990918	0.252484389440304	0.633060990703876
482	PAS_chr1-1_0485	36.4374198374506	-0.388740330724267	0.34068459062583	-1.14105639474377	0.25384645560239	0.633286326374763
3280	PAS_chr3_0638	85.7983305680519	-0.310578619920129	0.272072801086967	-1.14152763039645	0.253650420602486	0.633286326374763
1912	PAS_chr2-1_0488	26.3022132884768	0.49252122402627	0.432121286128352	1.13977542841983	0.254379873121203	0.63387914895202
4266	PAS_chr4_0498	116.910214767398	0.268915897307305	0.236192660747503	1.13854467982299	0.254893113202406	0.63442037351075
1794	PAS_chr2-1_0366	37.4320852782134	-0.43874779006969	0.386486998436366	-1.13522005098428	0.25628313032587	0.637140079220811
2387	PAS_chr2-2_0487	41.2714549166123	0.356576929922823	0.314731222553145	1.13295696254798	0.257232327039146	0.638019533385289
4450	PAS_chr4_0982	271.022368920543	-0.231370603909633	0.204107281846191	-1.13357349045482	0.256973498144949	0.638019533385289
2142	PAS_chr2-1_0725	69.3601935943262	-0.307940545274234	0.27228400914327	-1.13095347113169	0.258074675715662	0.639368820877068
670	PAS_chr1-1_0408	180.513787298376	-0.244196184245203	0.216451908877744	-1.12817754997545	0.25924494309838	0.639496350954248
950	PAS_chr1-4_0242	229.328811082296	-0.234379589054705	0.207533096198678	-1.12936005556591	0.258745976075933	0.639496350954248
1011	PAS_chr1-4_0299	367.432917526854	-0.236357701315375	0.209270050104355	-1.12943873811619	0.258712799019857	0.639496350954248
3605	PAS_chr3_0980	25.4806244824792	0.438487867053992	0.388973842075142	1.12729397101537	0.259618210606717	0.639496350954248
4077	PAS_chr4_0306	46.3729533259091	0.370877789653834	0.328875265756534	1.12771566691304	0.259440018980394	0.639496350954248
166	PAS_chr1-3_0180	29.0646304299644	-0.45260444566112	0.402932974400399	-1.12327477376265	0.261320814126073	0.642213881504788
2412	PAS_chr2-2_0261	25.3078420914616	-0.458263130283481	0.407921412976594	-1.1234103327392	0.261263263431825	0.642213881504788
981	PAS_chr1-4_0275	193.602412490845	-0.271089034997296	0.241931575686282	-1.12051944533616	0.262492470923761	0.642881560216708
2337	PAS_chr2-2_0330	44.9020561817802	0.347958197954502	0.310271680312557	1.12146296305219	0.262090848196528	0.642881560216708
3338	PAS_chr3_0701	92.3328856941447	-0.279284964080318	0.249098628897417	-1.1211822614862	0.262210288716906	0.642881560216708
580	PAS_chr1-1_0312	39.3979977128108	-0.372348500355439	0.333629541615898	-1.11605374797451	0.264399128569741	0.645345080146103
2082	PAS_chr2-1_0658	98.5217895144773	-0.281879575058079	0.25276893775001	-1.11516698834593	0.264778869539009	0.645345080146103
3207	PAS_chr3_0560	40.3431606631356	0.358828387761533	0.321643775195499	1.11560805908161	0.264589940923828	0.645345080146103
3388	PAS_chr3_0761	35.7394727032935	0.512540410208	0.459825311351157	1.11464157704139	0.265004045976935	0.645345080146103
3736	PAS_chr3_1114	33.6794856551661	0.379832165882968	0.340519255234725	1.11544989025993	0.26465768040276	0.645345080146103
3433	PAS_chr3_0806	83.2995365637681	0.329316517508523	0.29567957533969	1.11376146671676	0.265381531949025	0.6455307865684
1785	PAS_chr2-1_0358	76.1804131190799	-0.287465973690659	0.258267200893331	-1.11305644966272	0.265684186146369	0.645534252734319
102	PAS_chr1-3_0115	89.9574921776255	-0.312642309283513	0.28146211933583	-1.11077934757707	0.266663338145679	0.64717953980316
664	PAS_chr1-1_0402	23.2918241151491	-0.496952143544427	0.448192136557806	-1.10879264272931	0.267519645095243	0.647832495756763
2843	PAS_chr3_0189	34.9066451658833	-0.395835814677253	0.357010089873984	-1.10875245799628	0.267536984948547	0.647832495756763
1479	PAS_chr2-1_0807	55.8518306256014	0.344432412016572	0.311248077374105	1.10661699478574	0.268459556399489	0.649332764519306
826	PAS_chr1-4_0117	133.768308974666	0.286419701059878	0.259337083535184	1.10443017695547	0.269406576399923	0.650888718404775
568	PAS_chr1-1_0300	69.8110974836037	0.328879707810113	0.298282034690553	1.10257967145525	0.270209742260409	0.652055629179893
3815	PAS_chr4_0043	460.820618853816	0.225994166810865	0.205222260669967	1.101216632509	0.270802384493749	0.652055629179893
3845	PAS_chr4_0076	32.0369213910049	0.380569457556622	0.345432861338898	1.10171758437091	0.270584469779641	0.652055629179893
2993	PAS_chr3_0340	71.2383930520343	-0.304000515544084	0.276426397856666	-1.09975211449131	0.271440141413497	0.652537984497174
4062	PAS_chr4_0292	215.12836833638	-0.259010079873198	0.235601097121167	-1.09935854729909	0.271611704233075	0.652537984497174
818	PAS_chr1-4_0109	45.2282687261174	-0.360653351254273	0.32831756495909	-1.0984893583114	0.27199086196802	0.65271715251676
717	PAS_chr1-1_0457	66.8558735618114	0.318698654527062	0.291146791483368	1.09463220564211	0.273677800319148	0.656030789803058
3154	PAS_chr3_0506	63.5744609178864	0.324411708005426	0.296679654850601	1.09347473849796	0.274185414442303	0.65651323256967
3888	PAS_chr4_0121	92.4569289458818	0.280157447296774	0.256389670972568	1.0927017700598	0.274524762365714	0.656592149274247
4543	PAS_chr4_0784	222.104294289634	0.275474296223158	0.252900139616534	1.08926114726885	0.276038740887475	0.659477170258482
4041	PAS_chr4_0272	40.1061289257124	-0.364886126306884	0.335242494437243	-1.08842444606971	0.276407773990944	0.659623451740081
2329	PAS_chr2-2_0339	25.2323743143797	-0.447726242314411	0.412717134571669	-1.08482591298051	0.277998766262422	0.661945951222633
3810	PAS_chr4_0039	41.249623173607	-0.352326379805662	0.324718665394685	-1.08502041106082	0.27791261524205	0.661945951222633
3897	PAS_chr4_0131	33.1687338538579	0.433392437939909	0.400381847578894	1.08244776969943	0.279053611788774	0.663720188749549
2045	PAS_chr2-1_0623	26.0768843503082	0.415265715098068	0.384211924017965	1.08082464165961	0.279775124994009	0.664554554539182
2317	PAS_chr2-2_0350	26.9042479430348	-0.441801796972455	0.409767547521844	-1.07817663854628	0.280954935330144	0.664554554539182
2519	PAS_chr2-2_0162	30.9900745380691	-0.393535855266222	0.364951809955616	-1.07832279366989	0.280889728385874	0.664554554539182
2892	PAS_chr3_0233	42.1247679627652	0.346540154036441	0.320797442458668	1.08024600003191	0.280032649193791	0.664554554539182
4079	PAS_chr4_0308	66.336961131106	-0.302623229449803	0.280338932898904	-1.07949055209872	0.28036910330428	0.664554554539182
1361	PAS_c121_0018	25.622964563594	-0.412872191716752	0.384019464920494	-1.07513350085583	0.282314962608788	0.667035242415251
2006	PAS_chr2-1_0583	67.9193354774278	0.290972345790462	0.270895132101393	1.07411433912941	0.282771438597908	0.667377965765767
3215	PAS_chr3_0568	85.9379390470694	0.336794293691457	0.313955587853712	1.07274502101994	0.283385534546999	0.668091529740615
1897	PAS_chr2-1_0472	469.778555085921	0.302737751446267	0.282718057664247	1.07081151429597	0.284254188585645	0.669402995757183
399	PAS_chr1-1_0478	89.4050990099402	-0.270451815514033	0.253589214357659	-1.06649573484065	0.286199605721264	0.672253940084254
2455	PAS_chr2-2_0219	20.825891315503	0.448577099895307	0.420923721908747	1.06569688650752	0.286560685557198	0.672253940084254
4196	PAS_chr4_0430	28.6940789307949	-0.399883240976446	0.375208167508041	-1.06576368961338	0.286530478738054	0.672253940084254
4218	PAS_chr4_0450	113.857792986294	-0.291283158976033	0.273416607666786	-1.06534552330859	0.286719599270653	0.672253940084254
2884	PAS_chr3_0228	132.54415797076	-0.318855647483033	0.299631601524925	-1.06415894004594	0.287256704077333	0.672777176871831
1753	PAS_chr2-1_0323	31.49126243314	-0.41081517350983	0.38713962208287	-1.06115507190812	0.288619433445746	0.67301273280701
3143	PAS_chr3_0494	107.073875359323	0.268778223714263	0.253569430613442	1.05997881157846	0.28915423888099	0.67301273280701
3377	PAS_chr3_0745	33.2379384510275	0.394738015010141	0.372074558834117	1.06091106107077	0.288730322002443	0.67301273280701
3619	PAS_chr3_0997	225.278078315158	0.229075952795243	0.216152858629849	1.05978682978014	0.2892415897878	0.67301273280701
3749	PAS_chr3_1128	98.9490971395607	0.258282151065018	0.243467462103904	1.06084874271533	0.288758646627695	0.67301273280701
4611	PAS_chr4_0853	60.7329574267103	0.29518348393809	0.277993869032479	1.06183451083089	0.288310819725758	0.67301273280701
233	PAS_chr1-3_0255	49.5684912793587	0.312435019457	0.296454563441401	1.05390524547873	0.29192630110925	0.674772321211425
391	PAS_chr1-1_0123	47.0041292176479	0.342306393211588	0.324757088964325	1.05403824841277	0.291865406076082	0.674772321211425
1595	PAS_chr2-1_0169	33.5840181588237	0.382124719428192	0.363270105571399	1.05190246477104	0.292844300979404	0.674772321211425
1910	PAS_chr2-1_0486	252.177570274628	-0.232585590464861	0.220024969303425	-1.05708725332948	0.290471768051836	0.674772321211425
2859	PAS_chr3_0207	54.4185024792859	-0.328892635511203	0.311938474024722	-1.05435097911371	0.291722256804107	0.674772321211425
3289	PAS_chr3_0648	4033.56917077757	-0.284739386522546	0.270859463325101	-1.0512440031707	0.29314653805312	0.674772321211425
3966	PAS_chr4_0203	82.5648133214339	-0.295485521573745	0.280323288018558	-1.05408838367429	0.291842453997704	0.674772321211425
4069	PAS_chr4_0299	41.9628487687515	0.369343073623432	0.350935824601548	1.05245189499472	0.292592269997488	0.674772321211425
4352	PAS_chr4_0979	30.2455456896064	0.382516290764733	0.362794136862055	1.05436183195589	0.291717289874171	0.674772321211425
4521	PAS_chr4_0763	83.6735502106322	-0.266090025656714	0.253063050382081	-1.051477192166	0.293039479237961	0.674772321211425
864	PAS_chr1-4_0155	70.9022512439434	-0.28070216950836	0.267441212245265	-1.04958456907881	0.293909154708695	0.675077511833584
1450	PAS_chr2-1_0021	54.4776041753695	0.302855178143321	0.288467386327736	1.04987666716417	0.293774820456014	0.675077511833584
2036	PAS_chr2-1_0869	25.3413632077096	-0.407468190419123	0.389280529886746	-1.04672121808319	0.295228174729811	0.676656661439555
3294	PAS_chr3_0655	67.5283676340951	-0.285130302810693	0.27233029369554	-1.04700178206932	0.295098756278778	0.676656661439555
3795	PAS_chr4_0018	602.080028201271	0.195158031116776	0.186570703388848	1.04602720347809	0.295548472841086	0.676667069763297
2620	PAS_chr2-2_0061	122.398580548153	0.304176154674017	0.291595980073385	1.04314248295695	0.296882307443752	0.67827162564175
3973	PAS_chr4_0926	30.5725844861289	-0.366338314057019	0.351037741755685	-1.04358668735963	0.296676654781082	0.67827162564175
3062	PAS_chr3_0407	333.48723402597	0.211956304245381	0.203514199909721	1.04148164766588	0.297652066366686	0.679306047096707
3133	PAS_chr3_1193	22.3415759882391	0.431937745704311	0.415086660034875	1.04059654836419	0.29806283383847	0.67951984352749
295	PAS_chr1-1_0464	51.775176306534	0.315947749276627	0.305319537030639	1.03481012826546	0.300757591975745	0.67987713038399
1414	PAS_FragB_0042	60.4827447171453	0.302838747544709	0.291577126797476	1.0386231281957	0.298980045068827	0.67987713038399
1693	PAS_chr2-1_0262	643.075068131489	-0.203622966425092	0.196744416211019	-1.03496185735048	0.300686724560985	0.67987713038399
1864	PAS_chr2-1_0436	29.2634901182446	-0.429367869747947	0.414890172470551	-1.03489525237772	0.300717832072918	0.67987713038399
2430	PAS_chr2-2_0243	229.96410882765	-0.214992256663991	0.207577176736974	-1.0357220386344	0.300331837673903	0.67987713038399
3084	PAS_chr3_0429	27.8346162200814	-0.383353356914609	0.369026494371161	-1.0388233982166	0.298886877265961	0.67987713038399
3860	PAS_chr4_0093	49.1852727293157	0.341387435215722	0.329789093467657	1.03516896700892	0.300590008754542	0.67987713038399
4106	PAS_chr4_0336	44.2644389663902	-0.322317176167302	0.31093267878869	-1.03661402662133	0.299915773622218	0.67987713038399
4590	PAS_chr4_0831	51.5835392939227	0.340147058413513	0.329170099031577	1.03334737697692	0.301441363344674	0.680704785719321
153	PAS_chr1-3_0166	225.921230328609	0.231090108922021	0.224431215551742	1.02967008557125	0.303164902805019	0.682941691033316
451	PAS_chr1-1_0186	109.839920037776	0.249258169967243	0.242826754805643	1.02648561179655	0.304662742243514	0.682941691033316
1720	PAS_chr2-1_0289	78.109173746571	0.268790126822522	0.261854151187165	1.02648793461517	0.304661647902389	0.682941691033316
1756	PAS_chr2-1_0325	49.6006423845917	0.316329349990743	0.30730750827182	1.02935770027117	0.303311618487595	0.682941691033316
1907	PAS_chr2-1_0482	51.1064837922999	-0.352137748469366	0.342899492517363	-1.02694158537297	0.304447971080669	0.682941691033316
2388	PAS_chr2-2_0284	32.7255189824566	0.391238156652762	0.380450532784625	1.02835486597739	0.303782931096892	0.682941691033316
4038	PAS_chr4_0269	66.828552010037	0.286824844630734	0.278708207281194	1.02912234780855	0.303422185895956	0.682941691033316
341	PAS_chr1-1_0074	109.044912407944	0.242629822575184	0.237833339631527	1.02016741198307	0.307649070063747	0.684166270292774
782	PAS_chr1-4_0071	137.21646469051	-0.235539577368805	0.230903703339779	-1.02007708824923	0.307691902008798	0.684166270292774
1569	PAS_chr2-1_0141	26.6492904266141	0.37912922346338	0.370549958917167	1.02315278774091	0.306235611469378	0.684166270292774
2048	PAS_chr2-1_0625	37.1543862374666	-0.342295340938115	0.335607685613375	-1.01992700290077	0.307763081923581	0.684166270292774
2467	PAS_chr2-2_0207	225.539609521987	-0.274130445432979	0.267557497629915	-1.024566487059	0.305567784207335	0.684166270292774
3327	PAS_chr3_0690	113.707155918426	0.245314622080116	0.239991677009011	1.02217970696919	0.306695853550443	0.684166270292774
3640	PAS_chr3_1021	62.8298091051485	-0.30367484452267	0.297205228965876	-1.02176817540965	0.306890635162056	0.684166270292774
4664	PAS_chr4_0908	29.3811594981841	-0.369112905466265	0.361084959127234	-1.02223284613803	0.306670708272816	0.684166270292774
1566	PAS_chr2-1_0138	25.5955325444418	0.414153676473548	0.406408642267122	1.0190572576489	0.308175784385268	0.684373788536404
3822	PAS_chr4_0050	34.0721633732377	-0.442107518799497	0.434715493828221	-1.01700428228628	0.309151392267542	0.685829641438242
3232	PAS_chr3_1200	25.1181493444315	0.523836497530242	0.517020247215595	1.01318372027276	0.310972415003135	0.688444096437725
4350	PAS_chr4_0583	20.7272953314037	-0.435947210121426	0.430009181226963	-1.01380907467492	0.310673864321417	0.688444096437725
2085	PAS_chr2-1_0661	471.8859131552	-0.194905344489417	0.19267973361571	-1.01155083013632	0.311752865812725	0.689436959300497
3956	PAS_chr4_0194	46.566052110738	0.314701751436716	0.311308509438834	1.0108999333298	0.312064325954961	0.689436959300497
1931	PAS_chr2-1_0853	261.671334698151	0.312867654252384	0.310462491245822	1.00774703248985	0.313575919827979	0.691351024888229
2339	PAS_chr2-2_0328	78.8659365508196	0.266140039765203	0.263981525997639	1.00817676070099	0.313369612282085	0.691351024888229
600	PAS_chr1-1_0333	159.980378858598	0.260928625857338	0.259102317656765	1.00704859847295	0.31391142057352	0.691379418591011
367	PAS_chr1-1_0099	279.872972993918	0.207994123365953	0.206890723014136	1.00533325194935	0.314736408666646	0.692283980694654
1640	PAS_chr2-1_0213	22.0608959769025	-0.412561686444573	0.410569681594733	-1.00485180698707	0.314968213335178	0.692283980694654
961	PAS_chr1-4_0254	24.1140623176107	-0.430254347027005	0.429515298951615	-1.00172065599804	0.316478527497909	0.692528992401926
1618	PAS_chr2-1_0191	24.449745633126	-0.402463378659678	0.401464530685924	-1.00248801051502	0.316107954293798	0.692528992401926
1968	PAS_chr2-1_0543	31.9572242514954	0.374514082174217	0.374288277220763	1.00060329154611	0.317018638145726	0.692528992401926
2463	PAS_chr2-2_0211	28.9745825768335	0.39134956975386	0.390850296472974	1.00127740284552	0.316692714516415	0.692528992401926
3653	PAS_chr3_1033	21.160487446081	0.432044720627223	0.430665023302427	1.00320364378378	0.315762615269984	0.692528992401926
4207	PAS_chr4_0962	49.4974821373996	0.363121321310036	0.362686992106841	1.0011975317909	0.316731319598628	0.692528992401926
438	PAS_chr1-1_0171	267.267438305872	0.27324604295793	0.273761129291689	0.998118482579716	0.318221908731621	0.692644304218153
447	PAS_chr1-1_0181	22.0203345958964	-0.410995143479864	0.413025469079471	-0.995084260532088	0.319695285020784	0.692644304218153
1201	PAS_chr1-4_0491	86.3960257408206	-0.305151391083125	0.306337621504594	-0.996127702449202	0.319188101417277	0.692644304218153
1789	PAS_chr2-1_0362	120.104113226737	-0.289725247292067	0.290138825023059	-0.998574552264904	0.318000832765815	0.692644304218153
1894	PAS_chr2-1_0850	146.753911651339	0.232245892021136	0.233223354228357	0.995808900826183	0.319343004749041	0.692644304218153
1933	PAS_chr2-1_0508	20.6388747827839	0.423425144335895	0.424707940864515	0.996979579600021	0.318774421968881	0.692644304218153
2156	PAS_chr2-1_0739	89.7009382705287	-0.273309320329563	0.275004920805173	-0.993834290416894	0.320303548987489	0.692644304218153
4210	PAS_chr4_0442	33.7924912890098	0.35718361486921	0.358032555956348	0.997628871807842	0.318459355494448	0.692644304218153
4479	PAS_chr4_0720	425.421312684133	-0.19495892051711	0.195158370033895	-0.998978011976886	0.317805342956302	0.692644304218153
4594	PAS_chr4_0834	34.2215918745943	0.362775206150837	0.364893109753646	0.994195824623164	0.320127540478521	0.692644304218153
4276	PAS_chr4_0508	34.3304607156823	0.339082340237237	0.342331965338643	0.990507386307935	0.32192618067309	0.695451416514549
3405	PAS_chr3_0776	91.2657520312827	0.284760217583796	0.287761971017206	0.989568623599568	0.322385012504029	0.695741270690971
1512	PAS_chr2-1_0087	242.559767636388	-0.220844662270683	0.223631786283146	-0.987536995259996	0.323379455923408	0.697185285758414
3089	PAS_chr3_0436	26.6286817008544	-0.468037791744274	0.474913676230708	-0.985521822532031	0.324367817597148	0.698613299608732
4432	PAS_chr4_0670	25.1232855662035	-0.406337215151018	0.412688302377006	-0.984610450091734	0.324815454598611	0.698875019281951
2270	PAS_chr2-2_0403	44.1419206197691	-0.31111776038142	0.316625513953067	-0.982604833379083	0.32580196466077	0.6999514864822
3948	PAS_chr4_0185	190.062598481012	0.216435021453011	0.220342662179692	0.982265618977162	0.325969007703796	0.6999514864822
1456	PAS_chr2-1_0026	33.2440908397552	0.364676238491442	0.371550634648104	0.981498090662199	0.326347175510165	0.700062059177461
1599	PAS_chr2-1_0173	26.999657046587	-0.3637010092755	0.372271232545555	-0.976978550796276	0.328579771338507	0.70344300697145
1712	PAS_chr2-1_0280	230.162699458093	-0.301109936557752	0.308101290266916	-0.977308262152662	0.328416563964915	0.70344300697145
791	PAS_chr1-4_0081	34.5851265656493	-0.328352816969577	0.336995856827734	-0.97435268213824	0.329881455187275	0.704119480544154
1454	PAS_chr2-1_0806	36.9682800504733	-0.347046262865251	0.355747612232699	-0.975540666842884	0.329292139648106	0.704119480544154
1764	PAS_chr2-1_0333	32.6452212181039	-0.344684034282246	0.353596397073412	-0.974795097277772	0.329661909537028	0.704119480544154
2372	PAS_chr2-2_0491	28.8341176998751	-0.383095246351905	0.393448894529996	-0.973684897017035	0.330213018504019	0.704125869307575
403	PAS_chr1-1_0133	51.853964412208	0.295758858309606	0.304326487676638	0.971847243950268	0.331126548539748	0.705129466444947
3030	PAS_chr3_0375	22.6899471407733	-0.393952066623867	0.405544632640679	-0.971414820752705	0.331341751147952	0.705129466444947
570	PAS_chr1-1_0302	189.754332313622	-0.236748460642521	0.244880852033471	-0.966790415324759	0.333648816848528	0.705833577992493
1128	PAS_chr1-4_0415	24.1926461703656	-0.39685890774115	0.410113655729046	-0.967680305684205	0.333204056858939	0.705833577992493
1488	PAS_chr2-1_0060	38.1698065616153	0.329485955162248	0.340522465677756	0.96758947902735	0.333249433743516	0.705833577992493
1722	PAS_chr2-1_0291	37.6020726922905	-0.327131786732484	0.338362859777489	-0.96680760692119	0.333640221001626	0.705833577992493
2030	PAS_chr2-1_0610	24.1419723904696	-0.393458651784829	0.406163355255399	-0.968720212431321	0.332684804972583	0.705833577992493
2632	PAS_chr2-2_0050	51.3958935883138	-0.293829815222876	0.302932203112455	-0.969952392660612	0.33207022280585	0.705833577992493
2080	PAS_chr2-1_0656	156.946815079834	0.215147509146319	0.222957421919634	0.964971281484721	0.334559196294476	0.707061496705189
494	PAS_chr1-1_0228	22.9846483996417	0.416426831188065	0.432693399685467	0.962406247682016	0.335845576545624	0.709019975814712
4642	PAS_chr4_0885	31.5867187124381	-0.332362865900572	0.345561611404328	-0.961804942828813	0.336147594693303	0.709019975814712
579	PAS_chr1-1_0311	39.6529969351665	0.326251009015772	0.339827061757801	0.960050112925659	0.337029994272038	0.710182180653862
3330	PAS_chr3_0693	33.8027436163982	-0.349167710281397	0.365525715111661	-0.955248005396097	0.339452294503639	0.714045495223564
3498	PAS_chr3_0873	31.6249767014396	0.343995825472008	0.360169330330657	0.955094719353809	0.339529799175367	0.714045495223564
3219	PAS_chr3_0572	24.8754690878549	-0.364743683700346	0.383187207697891	-0.951868111390385	0.341163873730064	0.716778609219144
3358	PAS_chr3_0722	367.859779695951	-0.211153087868747	0.222426403152932	-0.949316649802435	0.342459587932637	0.718796177218061
3634	PAS_chr3_1014	87.1262117581276	0.258623369638913	0.27262427833046	0.948643940380921	0.342801734880091	0.718810291436433
909	PAS_chr1-4_0199	37.9766433203212	0.316024055586067	0.333603779790353	0.947303582065727	0.343484106065817	0.718834413377975
2168	PAS_chr2-1_0750	27.3548030031465	0.440319621104379	0.464589431083183	0.947760735920705	0.343251273394316	0.718834413377975
1475	PAS_chr2-1_0046	42.4692876683148	0.297615544905821	0.315091642886892	0.944536459866235	0.344895579480518	0.720644601528653
1922	PAS_chr2-1_0498	32.8090034411232	-0.353302610330376	0.374407333474615	-0.943631651259656	0.345357912165155	0.720644601528653
3662	PAS_chr3_1042	31.4408271875139	-0.346397095822823	0.366889928065414	-0.944144467659148	0.345095828392098	0.720644601528653
862	PAS_chr1-4_0153	21.2341861298054	0.422363649910967	0.448512942566254	0.941697796933866	0.346347383296269	0.722006266929868
37	PAS_chr1-3_0049	79.4852207968286	0.260085490626032	0.277444002076094	0.937434180158268	0.348535265932974	0.723481552539047
66	PAS_chr1-3_0077	82.6422356242987	0.259704341414524	0.277156891712505	0.937030069177985	0.348743090887931	0.723481552539047
374	PAS_chr1-1_0106	35.3196794148035	-0.325212646149348	0.346142333878995	-0.939534446725711	0.347456415030302	0.723481552539047
1546	PAS_chr2-1_0118	32.7791502304581	-0.334631164903933	0.356740013312466	-0.938025319326409	0.348231398487225	0.723481552539047
4095	PAS_chr4_0322	63.902593265817	0.267253334749777	0.284710211814832	0.938685455102649	0.347892263315599	0.723481552539047
676	PAS_chr1-1_0414	37.2455698297344	0.341930408849666	0.366568084389417	0.932788268840183	0.350929299383527	0.726859130557894
3360	PAS_chr3_0725	31.4460934481577	-0.328338870808041	0.352333115530013	-0.931898979504446	0.351388735071385	0.726859130557894
4201	PAS_chr4_0435	30.035793688356	0.413385585991398	0.443335600687501	0.932443921377714	0.351107155247482	0.726859130557894
3630	PAS_chr3_1010	35.9437582292892	0.390806051921014	0.419890601969632	0.930733029240979	0.35199167984118	0.727404213982304
1845	PAS_chr2-1_0422	64.3323661426365	-0.29054251754419	0.312704928588703	-0.929126761306462	0.352823397093246	0.728310306620266
1923	PAS_chr2-1_0852	70.2421476343966	0.293890430120333	0.316496476079271	0.928574099026381	0.353109850013279	0.728310306620266
368	PAS_chr1-1_0100	30.1996873640202	0.325543184066704	0.352655239135963	0.923120226043753	0.355944555314195	0.733451136575308
1293	PAS_chr1-4_0588	358.601449587866	0.182792761386013	0.198397075618066	0.921348063304655	0.356868735154586	0.733944049363031
3552	PAS_chr3_0931	101.79650934937	0.233912354785261	0.253727507712385	0.921903804968652	0.356578754266588	0.733944049363031
1691	PAS_chr2-1_0260	29.8124359870344	-0.346620079389046	0.376536820818167	-0.920547633657405	0.357286652976982	0.734099038666991
3255	PAS_chr3_1201	29.2198947383687	0.331441453464948	0.362069774317908	0.915407683751951	0.359977646101202	0.738919631795858
4045	PAS_chr4_0276	46.4545795975648	-0.286467596741764	0.313745063634992	-0.913058498587367	0.361211775852238	0.740035215727864
4466	PAS_chr4_0705	135.909786436716	0.227438764836135	0.248976454552871	0.913495074241399	0.360982223049194	0.740035215727864
3256	PAS_chr3_0614	64.1461789649615	0.25775184280896	0.282562240934264	0.91219492723702	0.361666113848866	0.740258339998203
596	PAS_chr1-1_0330	42.0755056777983	-0.318153512159552	0.349551626706019	-0.910176030813115	0.362729682778236	0.741019742796721
706	PAS_chr1-1_0445	28.1762645939776	0.361312585938836	0.396858724172894	0.91043125407375	0.362595121327141	0.741019742796721
720	PAS_chr1-4_0004	25.2297083867301	0.383768731706986	0.422136813989273	0.909109840670609	0.363292148651683	0.74146197577196
784	PAS_chr1-4_0073	56.9910155079023	-0.326357738831752	0.360288153551576	-0.905824228786455	0.365028894671941	0.741478555627362
1473	PAS_chr2-1_0044	51.3460785057666	-0.286318568762327	0.316087142481091	-0.905821624109417	0.365030273535636	0.741478555627362
1513	PAS_chr2-1_0088	390.982164603577	-0.18268024354851	0.201615381351788	-0.906082870878591	0.364891990945513	0.741478555627362
2007	PAS_chr2-1_0584	117.947965905335	-0.234351657845614	0.258547126334492	-0.906417569470196	0.364714876817465	0.741478555627362
3557	PAS_chr3_0935	21.5391333021202	0.374269140699699	0.412210999935955	0.907955248059486	0.363901866184319	0.741478555627362
3238	PAS_chr3_0594	216.906888621709	0.200335342272013	0.221621621836994	0.903952153275744	0.366020772849543	0.742786473689934
710	PAS_chr1-1_0449	39.5493635076844	-0.306492331358181	0.339354279055082	-0.903163302409494	0.36643923131787	0.742932140694603
2170	PAS_chr2-1_0752	32.5936727967082	0.345570849869086	0.38302448128915	0.902216089963739	0.366942089255575	0.743248485136765
1803	PAS_chr2-1_0375	21.8326047286338	0.477284490350464	0.530003628433709	0.900530609122352	0.367837943597918	0.743962957008868
2524	PAS_chr2-2_0463	75.5137669964881	0.242862460091456	0.269773322775502	0.900246390535656	0.367989143457489	0.743962957008868
1979	PAS_chr2-1_0556	47.4150056145813	-0.287311693935615	0.320124124567046	-0.897500912573182	0.369451686670786	0.746215800693208
1584	PAS_chr2-1_0159	29.3340689610949	0.319413200840448	0.356482470241863	0.896013766465811	0.37024541080624	0.747114797888675
258	PAS_chr1-3_0281	71.5530495328466	0.244635650444771	0.273848237909904	0.893325632883043	0.371682814892566	0.747572683418765
545	PAS_chr1-1_0279	54.2344397741525	-0.282343884094076	0.316402863790078	-0.892355652891311	0.372202333109814	0.747572683418765
1100	PAS_chr1-4_0390	45.4213648053585	-0.287446162116124	0.322130200263212	-0.892329132385761	0.372216543727402	0.747572683418765
2634	PAS_chr2-2_0048	143.731147076845	0.201912749279172	0.22617946340921	0.892710355908246	0.372012303114142	0.747572683418765
3088	PAS_chr3_0434	122.98073820268	-0.250621889828289	0.280228432073106	-0.894348542630773	0.371135435139872	0.747572683418765
330	PAS_chr1-1_0063	24.5872289533321	0.352576105017935	0.396235205088169	0.889815191811342	0.373565127879811	0.747629615602469
1652	PAS_chr2-1_0223	35.6165496105061	0.328363501984636	0.369082494441804	0.889675091421633	0.373640372519946	0.747629615602469
2548	PAS_chr2-2_0462	73.4665336807128	0.254129599168786	0.285164316935064	0.891169000035357	0.372838512452383	0.747629615602469
4368	PAS_chr4_0600	40.3109707481018	0.289923860957559	0.325651508423832	0.890288708812693	0.373310882407697	0.747629615602469
1839	PAS_chr2-1_0415	100.020436388098	0.25724694764522	0.290315722135676	0.886093752528494	0.375567009303903	0.750783676248381
731	PAS_chr1-4_0014	24.9984861315845	-0.345786585065301	0.393947040900312	-0.877748908267093	0.380079996485545	0.753892647791413
1230	PAS_chr1-4_0522	20.8336174751545	0.370971024279966	0.422608674117636	0.877812139219612	0.380045675628047	0.753892647791413
1905	PAS_chr2-1_0480	66.4231110627891	0.249530305001942	0.284428117660763	0.877305334838788	0.380320815355629	0.753892647791413
2191	PAS_chr2-1_0770	23.7347062001456	0.366715179492505	0.416289978417188	0.880912821602922	0.378365007211179	0.753892647791413
2206	PAS_chr2-1_0782	120.839227103246	0.231314814442678	0.263841933064133	0.876717403319097	0.380640151614703	0.753892647791413
2436	PAS_chr2-2_0238	33.5851440626534	0.32067970585856	0.36430285213244	0.880255820072414	0.378720740271235	0.753892647791413
2752	PAS_chr3_0092	96.7236396338745	0.222701625657342	0.253191293407409	0.879578529973356	0.379087673984323	0.753892647791413
3581	PAS_chr3_0959	50.1810414264803	0.261815739470468	0.29756400103239	0.879863621144043	0.378933194223869	0.753892647791413
3773	PAS_c131_0007	96.7310246313765	0.229716291809187	0.261258585180462	0.879267916307947	0.37925602748683	0.753892647791413
4671	PAS_FragD_0023	41.1337391776466	-0.295153511096721	0.335772913740332	-0.879027160972777	0.379386549208242	0.753892647791413
1319	PAS_chr1-4_0615	131.499855578335	0.216813238236033	0.24828389057506	0.873247304663478	0.382528295913814	0.75693272220065
817	PAS_chr1-4_0108	34.349030556427	-0.323254565287343	0.370832697950433	-0.871699197708156	0.38337249806441	0.757204851015697
4333	PAS_chr4_0564	75.5320048524449	0.22689793322671	0.260168673725516	0.87211857591315	0.383143693263529	0.757204851015697
2272	PAS_chr2-2_0402	53.4752032648789	-0.259023633584946	0.297401221021182	-0.870956859879527	0.383777708614647	0.75730720954069
450	PAS_chr1-1_0184	26.6048662977523	-0.335680085447055	0.385824806302754	-0.870032408397425	0.384282693628855	0.757372302995609
3957	PAS_chr4_0195	26.4543146637376	-0.338552951238474	0.38931908588655	-0.869602759051814	0.384517529472339	0.757372302995609
1875	PAS_chr2-1_0449	1116.4026229574	0.15369359178257	0.177070055421027	0.867981835873529	0.385404276482088	0.758307338847917
4684	PAS_FragD_0007	29.5043101083576	0.324282510005731	0.373837745141497	0.867441862733765	0.385699953030438	0.758307338847917
1755	PAS_chr2-1_0324	1763.33616480631	-0.401244887871819	0.463236898616855	-0.866176440326464	0.386393411146148	0.758974408878273
1657	PAS_chr2-1_0228	66.2678440911488	-0.272272586164655	0.314703395650974	-0.865172063369225	0.386944356356174	0.759360582116558
3917	PAS_chr4_0153	149.732783677132	0.193661735650498	0.224156857297185	0.863956329445425	0.387611880949058	0.759974621110551
2	PAS_chr1-3_0008	38.1966540341913	0.310524012596382	0.360403980332848	0.861599842237038	0.388907757856573	0.760661384310129
147	PAS_chr1-3_0161	23.6640080124833	0.352292279853165	0.408984371119023	0.861383233029802	0.389027007561317	0.760661384310129
4140	PAS_chr4_0372	33.6008095113757	0.299670716313315	0.347665509097205	0.86195123896955	0.388714351010277	0.760661384310129
1999	PAS_chr2-1_0576	22.4170659202561	0.352339703234674	0.409824246851634	0.859733668618756	0.389935870893313	0.761743456084202
4442	PAS_chr4_0680	84.8448401403	-0.221950688721101	0.25910778077046	-0.85659600055671	0.391668196810266	0.764430733847359
1129	PAS_chr1-4_0417	24.4609267647359	-0.331952193331465	0.387888980173673	-0.855791760783813	0.392112973399409	0.764602458594115
822	PAS_chr1-4_0113	93.761589677257	-0.254394436957325	0.298396146222496	-0.852539284363406	0.393914844886616	0.764637239666684
843	PAS_chr1-4_0136	20.5715286129418	-0.36513204612113	0.427566600924071	-0.853977006931772	0.393117729469121	0.764637239666684
1062	PAS_chr1-4_0350	32.5988006865899	-0.295669249961124	0.346510892304648	-0.853275485785236	0.393506551137082	0.764637239666684
1355	PAS_chr1-4_0648	48.0063242958062	-0.258477592709941	0.303073657331494	-0.852854038802932	0.393740252222763	0.764637239666684
2738	PAS_chr3_0075	30.5612848659269	0.35646583683851	0.417677836662594	0.853446856761204	0.393411546409018	0.764637239666684
1642	PAS_chr2-1_0817	21.4431548388116	-0.349125294862872	0.409952626525359	-0.85162351031132	0.394423086499365	0.764930927029989
3678	PAS_chr3_1059	85.8623435442659	0.220632744379865	0.259647232782735	0.849740403605548	0.395469429916697	0.765722486518058
4484	PAS_chr4_0726	81.7646558604055	0.239661737608891	0.282086750447224	0.849602958057861	0.395545866810775	0.765722486518058
1025	PAS_chr1-4_0312	22.87637380266	-0.416639552854945	0.492586207085219	-0.845820583000745	0.397652841223862	0.768413019605714
3003	PAS_chr3_0348	28.0385380948537	-0.378559530414946	0.447406086729546	-0.846120653346818	0.39748544017277	0.768413019605714
1567	PAS_chr2-1_0139	50.5656854614015	0.246356856159428	0.292966248170719	0.840905249999546	0.400401017049795	0.77025078953116
2390	PAS_chr2-2_0283	27.9818977682205	0.351597624809424	0.417678349579767	0.841790399629696	0.399905286634711	0.77025078953116
3132	PAS_chr3_0482	45.1628243864478	0.338036422733056	0.401965134634831	0.840959559938322	0.400370589993047	0.77025078953116
3564	PAS_chr3_0943	84.6809829086978	-0.237592785013639	0.281945804384609	-0.842689557066551	0.399402089158165	0.77025078953116
3871	PAS_chr4_0105	59.8977339288394	0.257908566902793	0.306577156729333	0.84125174117422	0.400206919769848	0.77025078953116
4323	PAS_chr4_0553	21.9352486619466	-0.39073107916483	0.465456218097003	-0.83945828624294	0.401212187819681	0.77111903004267
193	PAS_chr1-3_0210	37.6635537756806	0.279780401078062	0.334304927323732	0.836901816906604	0.402647759004188	0.773184720023274
180	PAS_chr1-3_0197	23.4840604196016	0.328524488306206	0.39465277212638	0.832439327706033	0.40516101127691	0.773202435200056
949	PAS_chr1-4_0241	379.908119425207	-0.158995275235619	0.190915446057629	-0.832804670962166	0.404954899982262	0.773202435200056
1203	PAS_chr1-4_0493	37.9476804324333	0.339349988982161	0.406867415973372	0.83405545801773	0.404249733395729	0.773202435200056
3244	PAS_chr3_0601	27.806659041555	-0.318278073614927	0.382361452302271	-0.832401048009716	0.405182610699796	0.773202435200056
3286	PAS_chr3_0644	20.9777012566911	0.344886920140917	0.413751419740338	0.833560692933359	0.404528583329067	0.773202435200056
3495	PAS_chr3_0870	63.2585186390331	0.232283849893405	0.278663712355153	0.833563322365284	0.404527101075423	0.773202435200056
3590	PAS_chr3_0967	54.6600262053322	0.244655943712812	0.293445910824659	0.83373437723247	0.40443068163838	0.773202435200056
2287	PAS_chr2-2_0383	55.5287233883788	-0.259678573231695	0.312319227879695	-0.831452405266972	0.405718104797477	0.773535496958179
2753	PAS_chr3_0094	35.2688110204209	0.288279240644129	0.347001251511467	0.830772913320753	0.406101927178514	0.773579048838717
2530	PAS_chr2-2_0152	64.7412260785149	0.283790984798099	0.342041667269838	0.829697115744134	0.406710052596271	0.774049416264485
1218	PAS_chr1-4_0510	164.655764121257	0.191593524823873	0.23141184242934	0.827933103217807	0.407708386408471	0.775260933516728
4295	PAS_chr4_0972	124.831074249719	0.464850665671125	0.56211443445733	0.826968028529451	0.408255183021816	0.775612462070701
1036	PAS_chr1-4_0324	42.6654655769674	0.271367274581197	0.328693150712665	0.825594552222413	0.409034126504656	0.775820098536604
2912	PAS_chr3_0253	34.5035412630394	0.321058358174485	0.388926550732515	0.825498690099184	0.409088526059899	0.775820098536604
894	PAS_chr1-4_0184	46.5187457645842	0.258237441728502	0.313827500732137	0.822864284124408	0.410585175215274	0.775906432041117
2665	PAS_chr2-2_0018	51.8288388927501	0.239207654231334	0.290870790810516	0.822384583769235	0.410858050487777	0.775906432041117
3209	PAS_chr3_0562	65.4641422894396	0.228656684568751	0.27809236800036	0.822232865335073	0.410944377212631	0.775906432041117
4058	PAS_chr4_0287	171.235262005539	-0.192189040662942	0.233462564679292	-0.823211382634096	0.410387797024717	0.775906432041117
4678	PAS_FragD_0016	52.0512830216046	0.258635964279892	0.314199601685074	0.823158154538737	0.410418061616189	0.775906432041117
742	PAS_chr1-4_0025	42.6533226183887	-0.273060003258606	0.33397185536187	-0.817613816477847	0.413577735698538	0.780191098241168
2481	PAS_chr2-2_0196	21.0509869962365	0.344930327776381	0.422789271609331	0.81584456120047	0.414589043181027	0.780724358116819
2751	PAS_chr3_0091	308.134828278862	0.163149417773454	0.199842926211669	0.81638825484696	0.414278112005879	0.780724358116819
1021	PAS_chr1-4_0308	32.4320625468181	0.30020620404812	0.368317639617384	0.815074196174749	0.41502984090826	0.780868260813346
1600	PAS_chr2-1_0174	48.1222075615444	-0.283671070911841	0.349931093153453	-0.810648371813718	0.417567629819023	0.783579186254087
1660	PAS_chr2-1_0231	116.986650232951	0.211514606394238	0.260744763483616	0.811194071813174	0.417254229482937	0.783579186254087
2035	PAS_chr2-1_0613	34.8447495368096	0.274203597182519	0.338178335720503	0.810825437999499	0.417465923943338	0.783579186254087
350	PAS_chr1-1_0083	46.0336083580476	0.24895269736894	0.308294072394109	0.807516977007234	0.419368697507995	0.785018694894123
870	PAS_chr1-4_0161	28.2574555457168	-0.308368940969935	0.38192638992091	-0.807404120552635	0.419433693725511	0.785018694894123
4131	PAS_chr4_0363	22.4451571282596	0.375664131370806	0.464572451715779	0.808623348163214	0.418731830633383	0.785018694894123
2785	PAS_chr3_0127	22.4176906446238	0.337137538315929	0.418381250865802	0.805814164994855	0.42035000928233	0.786047181406662
2081	PAS_chr2-1_0657	111.345613116233	0.205883113110913	0.255971762638279	0.804319628809416	0.421212404327032	0.786287615394452
3157	PAS_chr3_0508	23.8025413037007	-0.314345703808301	0.390625252674069	-0.804724481216746	0.420978689110507	0.786287615394452
1418	PAS_FragB_0048	36.6766898521027	0.272003207911178	0.338993579556328	0.802384541521916	0.422330552322245	0.787099084844198
3275	PAS_chr3_0633	65.709835076555	-0.219689652834645	0.273826142241877	-0.802296124964534	0.422381683420825	0.787099084844198
3216	PAS_chr3_0569	43.5690682295556	-0.267085546910291	0.333195682557996	-0.801587658218837	0.422791519127092	0.787178301902136
1768	PAS_chr2-1_0338	161.146132271198	0.176779088350879	0.221413110015026	0.798412922969565	0.42463090638933	0.787183419024511
2844	PAS_chr3_0191	38.0981481634036	0.261333001888526	0.326608315254487	0.800141912139928	0.423628580337841	0.787183419024511
2853	PAS_chr3_0200	26.1145391765299	-0.311459504554899	0.389583403511593	-0.799468102972284	0.424019034879636	0.787183419024511
3150	PAS_chr3_0503	26.4956361280236	-0.30804691401793	0.385023104061783	-0.800073841720676	0.423668015785023	0.787183419024511
3312	PAS_chr3_1208	61.5422661804494	-0.228513367944275	0.28616426044264	-0.798539159260525	0.424557678076843	0.787183419024511
2811	PAS_chr3_0160	25.1730382041919	-0.319176885290179	0.400565852152529	-0.796815014497644	0.42555847376598	0.788221097044508
1354	PAS_chr1-4_0647	40.6542161336943	-0.258430819298253	0.325070070418295	-0.795000348588563	0.426613299378353	0.788811303337195
4438	PAS_chr4_0677	44.0059179697183	-0.247779196368387	0.311592894242486	-0.795201690881826	0.426496188373764	0.788811303337195
3529	PAS_chr3_0907	34.6172999685608	-0.313563254372374	0.395065864519991	-0.793698677949199	0.42737087008285	0.788850796371703
4179	PAS_chr4_0412	447.887430712785	-0.163616277165641	0.206037328737272	-0.794109874013536	0.427131469844684	0.788850796371703
1139	PAS_chr1-4_0426	281.897687553393	0.182579538316293	0.230667238288934	0.79152782887873	0.428636043317701	0.789764323479077
2228	PAS_chr2-2_0446	23.7566615122659	0.310504309665346	0.392883439779071	0.7903217041674	0.429339914537156	0.789764323479077
2477	PAS_chr2-2_0200	27.7264368113044	0.317080052383306	0.401053912970166	0.790617027110001	0.429167507665671	0.789764323479077
3496	PAS_chr3_1233	24.7954471885487	-0.330916571415247	0.418126735170447	-0.791426482882877	0.428695161052883	0.789764323479077
806	PAS_chr1-4_0095	88.6935907898296	-0.205488677499271	0.260517950495718	-0.788769745456173	0.430246595356955	0.790527858669716
2293	PAS_chr2-2_0377	40.7265326379174	0.251408025578705	0.318904600790421	0.788348694109703	0.430492772313373	0.790527858669716
1628	PAS_chr2-1_0201	29.6868664758411	-0.302370249616142	0.384577555311483	-0.786239980570998	0.431726907479416	0.791536085176254
2309	PAS_chr2-2_0360	25.4232875158566	-0.329199010564455	0.418749179566334	-0.786148431157242	0.431780533630911	0.791536085176254
2225	PAS_chr2-1_0801	36.5032807644015	-0.263789299534108	0.336017063541301	-0.785047332876549	0.432425817295111	0.792041475609763
1540	PAS_chr2-1_0112	47.3746263239606	0.240357471543362	0.307251886679773	0.7822815154716	0.434049147589606	0.794335886664838
2394	PAS_chr2-2_0278	26.0355609909664	-0.291562538181182	0.374838149236516	-0.777835817338889	0.436665809643516	0.798442687769672
2445	PAS_chr2-2_0476	67.2996498888415	0.207949039016141	0.267581437879617	0.777142991173009	0.437074412174815	0.798508495558933
3091	PAS_chr3_0440	116.857068346456	0.183203199130496	0.236171978684572	0.775719457282355	0.43791464884742	0.799362088994908
1140	PAS_chr1-4_0428	59.9307877984428	0.214881351936997	0.278691018948073	0.771037950013863	0.440684437710903	0.803457435931137
3740	PAS_chr3_1118	24.0512485288387	0.308643422570652	0.400491948802266	0.770660742353744	0.44090804696921	0.803457435931137
800	PAS_chr1-4_0090	148.451613351559	-0.178448716127682	0.232039135972996	-0.769045770574016	0.441866139486326	0.803494791135869
1277	PAS_chr1-4_0569	45.6090015268132	0.242894525875495	0.315803183790196	0.769132606455489	0.441814593235726	0.803494791135869
1717	PAS_chr2-1_0285	31.6442128873441	-0.26834462551642	0.349170188615025	-0.768521008568348	0.442177714315016	0.803494791135869
1784	PAS_chr2-1_0357	37.5310290627736	-0.256862383149542	0.334679818233333	-0.767486920799215	0.442792066600682	0.803494791135869
2909	PAS_chr3_0250	26.5851628476585	0.284990673153038	0.371338778458221	0.767468117217125	0.442803242338526	0.803494791135869
2322	PAS_chr2-2_0346	27.1669595393377	0.303111761289964	0.395734428600912	0.765947411655821	0.443707593647323	0.804454630445189
1294	PAS_chr1-4_0589	133.978008734939	-0.192400639991656	0.252095811432483	-0.763204429690358	0.445341487422199	0.806561012026441
2507	PAS_chr2-2_0172	111.706598892953	0.184241612972168	0.241954376727154	0.761472536534987	0.44637487646447	0.806561012026441
2624	PAS_chr2-2_0057	23.935196283082	-0.295578004837111	0.387936695852977	-0.761923293147631	0.446105786888766	0.806561012026441
3847	PAS_chr4_0078	44.3060105057974	0.242560154897071	0.318529804802898	0.76149908498253	0.446359025194833	0.806561012026441
2327	PAS_chr2-2_0341	21.9302411715242	0.310590850873965	0.40857264547249	0.760185133086395	0.447143930318786	0.80726996012903
1118	PAS_chr1-4_0406	26.4684650550837	0.291679946262481	0.384239410386013	0.759109915272499	0.447786808327452	0.807750109634453
254	PAS_chr1-3_0276	21.0976081642587	0.323208653785123	0.426850992676941	0.757193164195688	0.448934144987815	0.807779909915103
660	PAS_chr1-1_0398	158.18070652404	0.190047654250099	0.250577660404273	0.758438138274113	0.448188733553047	0.807779909915103
4287	PAS_chr4_0520	168.973265854456	0.200258737228321	0.26426393756765	0.75779820383951	0.448571797824095	0.807779909915103
209	PAS_chr1-3_0230	78.712489944244	-0.255607371280379	0.338265184201993	-0.755641973274273	0.449863883230087	0.808180282321963
1874	PAS_chr2-1_0448	89.6597984309621	0.191294110307667	0.253223324536249	0.755436374820533	0.449987194762567	0.808180282321963
2008	PAS_chr2-1_0585	28.4851139708618	-0.298338772849714	0.396173522561371	-0.753050761496808	0.451419411077643	0.808180282321963
2303	PAS_chr2-2_0366	50.6767395795791	-0.228444485163489	0.303116386833482	-0.753652705978533	0.451057787278896	0.808180282321963
2471	PAS_chr2-2_0204	50.0218475368572	0.233784197421096	0.310381911117378	0.753214633479994	0.451320947200685	0.808180282321963
3723	PAS_chr3_1101	26.0492207404731	0.294835695888478	0.39110396947354	0.753855033190669	0.450936274133735	0.808180282321963
612	PAS_chr1-1_0346	119.470521560018	0.185763495902345	0.248669424145279	0.747029903418354	0.455045510472195	0.809046867047322
1039	PAS_chr1-4_0327	35.3059009536516	0.273521698849954	0.364678211727889	0.750035757699853	0.45323316907869	0.809046867047322
2341	PAS_chr2-2_0326	280.285771079317	-0.15634274782223	0.208974256541261	-0.748143577155691	0.454373559647638	0.809046867047322
2818	PAS_chr3_0167	63.6610006223534	0.207129842373374	0.27609974066167	0.75019933693885	0.453134658100607	0.809046867047322
3072	PAS_chr3_0417	107.472093895744	-0.196501276580374	0.26323006126295	-0.746500136183467	0.455365349354244	0.809046867047322
3222	PAS_chr3_0576	313.862356838613	0.15209429746295	0.20364651250491	0.746854417451822	0.455151443430817	0.809046867047322
3492	PAS_chr3_1232	69.8700733096161	0.201763948890697	0.268523805534969	0.751381980784648	0.45242280393014	0.809046867047322
3873	PAS_chr4_0107	146.131419644548	-0.206076054839624	0.276073062743387	-0.746454771037095	0.455392743750112	0.809046867047322
4035	PAS_chr4_0266	57.7995696096188	-0.223255522754091	0.298765220251542	-0.747260750652713	0.45490617956306	0.809046867047322
4053	PAS_chr4_0283	51.9414227427375	0.233171806199645	0.312570607234711	0.745981230489004	0.455678753395295	0.809046867047322
776	PAS_chr1-4_0064	92.8179053532414	-0.211716080404861	0.284058460877158	-0.745325732425264	0.456074828729692	0.809079766529577
2231	PAS_chr2-2_0443	22.2732856991074	-0.313125552053786	0.421400334592089	-0.743059571504348	0.457445614836345	0.810840324726458
504	PAS_chr1-1_0238	94.9650836914736	0.265510392800537	0.357863462161531	0.741932107840313	0.458128471129067	0.811379598040984
4173	PAS_chr4_0405	256.83232789515	-0.206319904989988	0.278680870564256	-0.740344698120985	0.459090865574708	0.812412654770107
84	PAS_chr1-3_0096	78.3231999639297	0.195141181444608	0.266995649702769	0.730877756479733	0.464853823649875	0.812716235869916
733	PAS_chr1-4_0016	32.5585172371333	-0.261529641151937	0.356578953010347	-0.733441048452313	0.463289470862257	0.812716235869916
737	PAS_chr1-4_0020	23.7653572496262	0.288167037312125	0.389736045006532	0.739390264267949	0.459670052360344	0.812716235869916
1309	PAS_chr1-4_0603	60.7859312511222	0.224325370284124	0.305892345491216	0.733347445892743	0.463346543957286	0.812716235869916
1570	PAS_chr2-1_0142	38.3615100925999	0.246019982035746	0.334274739011319	0.735981374971369	0.461742032545449	0.812716235869916
1714	PAS_chr2-1_0282	60.2600069007837	-0.211733122166219	0.287400535844414	-0.736717910229791	0.461293912862298	0.812716235869916
1808	PAS_chr2-1_0380	128.966535305013	-0.170905640861205	0.234099415916705	-0.730055819199544	0.465356065542186	0.812716235869916
1904	PAS_chr2-1_0479	24.4134055665918	0.290591213935897	0.394567797633257	0.736479803164262	0.46143875437606	0.812716235869916
2181	PAS_chr2-1_0760	24.3112235202968	-0.317771590739988	0.435765159257629	-0.729226703854306	0.465862998991836	0.812716235869916
2183	PAS_chr2-1_0762	171.208849394815	0.177779445936787	0.244078137930959	0.728371034963708	0.46638648914907	0.812716235869916
2290	PAS_chr2-2_0380	35.6290092380555	-0.251859528410244	0.346142368886983	-0.727618318497373	0.46684726381515	0.812716235869916
2637	PAS_chr2-2_0045	24.0354321285842	-0.288990362619935	0.396939263608358	-0.728046804926482	0.466584935300335	0.812716235869916
2722	PAS_chr3_0062	24.8744200188013	0.2843379094447	0.38886543423218	0.731198724325111	0.464657779254844	0.812716235869916
2945	PAS_chr3_0285	119.638530102603	-0.175028237257398	0.238097050403946	-0.735113001023959	0.462270677073815	0.812716235869916
3287	PAS_chr3_0646	33.4963044075761	-0.25682702558295	0.352809080171625	-0.727949024038769	0.466644791636943	0.812716235869916
3461	PAS_chr3_0839	30.1907393750305	0.280796026984587	0.382831012394584	0.733472518927413	0.463270282978444	0.812716235869916
3643	PAS_chr3_1024	415.62350030595	-0.150661843033738	0.206006631448166	-0.73134462698909	0.464568678373199	0.812716235869916
4340	PAS_chr4_0978	37.291811148654	0.240414259891397	0.32723515848765	0.734683464339514	0.462532293154283	0.812716235869916
4617	PAS_chr4_0859	107.152029184993	-0.186589951023923	0.25578767003045	-0.729472030460698	0.465712970712298	0.812716235869916
4675	PAS_FragD_0019	35.2193715152523	-0.247896776226078	0.338511104507411	-0.732315049418565	0.463976295812193	0.812716235869916
4165	PAS_chr4_0396	33.0125659964936	-0.258233992777476	0.357548489082326	-0.722234887470094	0.470150077354322	0.817801636177201
2041	PAS_chr2-1_0619	29.0911906232099	-0.286559364762184	0.397911616208631	-0.720158329361102	0.471427517328366	0.819358612842407
2208	PAS_chr2-1_0783	330.550428635254	-0.201845480143055	0.280691952358349	-0.71909963376993	0.472079532965026	0.819758306257889
3265	PAS_chr3_0624	41.8637745005293	0.228335844375467	0.317776171019789	0.71854300353203	0.472422542337141	0.819758306257889
1834	PAS_chr2-1_0410	34.6373861282849	0.261325418662497	0.364062201150915	0.717804314307734	0.472877952846789	0.819884670672062
13	PAS_chr1-3_0022	27.0098659505839	0.274029491072388	0.386997341115093	0.708091405183302	0.478888496649733	0.819967481468173
342	PAS_chr1-1_0076	74.2850320773162	0.186498288870017	0.263724779086512	0.707170139704009	0.479460752521999	0.819967481468173
498	PAS_chr1-1_0232	45.5212111487805	0.221145618807579	0.313802075386618	0.704729624669044	0.480978511669036	0.819967481468173
916	PAS_chr1-4_0693	37.6760145825587	0.237805664203692	0.334218362086878	0.711527824859233	0.476757214608522	0.819967481468173
1137	PAS_chr1-4_0424	29.619619242659	-0.258326260877477	0.36029382875438	-0.716987747946091	0.473381656590922	0.819967481468173
1384	PAS_FragB_0012	37.9815571450527	0.227898202509051	0.323693312288534	0.70405595005283	0.481397931024373	0.819967481468173
1419	PAS_FragB_0049	84.1383974181984	0.197750568864219	0.278497287311089	0.71006281882856	0.477665181800962	0.819967481468173
1436	PAS_FragB_0066	171.156806094945	0.153688188547108	0.217259833783529	0.707393473844953	0.479321991399843	0.819967481468173
2514	PAS_chr2-2_0166	106.209710903999	-0.173447496913041	0.242220292832404	-0.716073351595905	0.473946057447136	0.819967481468173
2664	PAS_chr2-2_0019	239.837657181098	-0.141734792006002	0.201553849859624	-0.703210542019987	0.481924550457697	0.819967481468173
2889	PAS_chr3_1169	49.8960335585475	-0.220567577476227	0.309983512429665	-0.711546158527622	0.476745857936958	0.819967481468173
3144	PAS_chr3_0495	96.923529686867	0.181781836454687	0.255679370902168	0.710975765519398	0.477099253559799	0.819967481468173
3177	PAS_chr3_0528	126.971272811998	0.164509132755335	0.230295801785402	0.714338392102478	0.475017957616721	0.819967481468173
3334	PAS_chr3_0697	26.1521035475738	0.277051242830651	0.393229812921221	0.704552996052093	0.481088458652105	0.819967481468173
3348	PAS_chr3_0709	135.525135733275	-0.182900673322454	0.257782111057165	-0.709516547026393	0.478003986760848	0.819967481468173
3356	PAS_chr3_0721	47.0055301322665	0.214684151017769	0.302792929724333	0.709013090937164	0.478316353157696	0.819967481468173
3460	PAS_chr3_0838	27.5556216256283	0.268496085797236	0.379869217356903	0.706811906648841	0.479683374297596	0.819967481468173
3628	PAS_chr3_1007	25.1860939460962	-0.284988619462794	0.400504430666969	-0.711574199037439	0.476728488712218	0.819967481468173
3711	PAS_chr3_1254	20.8442253720375	0.308624632975505	0.43156889933306	0.715122506400367	0.474533348013431	0.819967481468173
4100	PAS_chr4_0329	20.7894874069595	-0.309507736179499	0.440320305308758	-0.702914974503545	0.482108738520718	0.819967481468173
4358	PAS_chr4_0590	31.3106284564389	-0.276002458540497	0.392172702951334	-0.703777841913558	0.481571134865926	0.819967481468173
4430	PAS_chr4_0668	21.5410764399264	0.313295384159543	0.439555283383466	0.712755359799023	0.475997153287106	0.819967481468173
4474	PAS_chr4_0715	21.9501684496462	0.311267979605529	0.439907090516604	0.70757663678481	0.479208205656766	0.819967481468173
4530	PAS_chr4_0773	25.5214761817434	0.30005582447986	0.425581805334719	0.705048525850082	0.480780038163372	0.819967481468173
1848	PAS_chr2-1_0424	21.4584270273342	0.284433306795603	0.406423343718368	0.699844906036455	0.484024167103964	0.821920594377017
2359	PAS_chr2-2_0307	22.5040331872847	-0.306381644074253	0.43743768936312	-0.700400654823144	0.483677127447699	0.821920594377017
439	PAS_chr1-1_0172	52.9156305538499	0.218080244193384	0.312107925758271	0.698733438644837	0.484718632505725	0.822448162675985
2894	PAS_chr3_0235	101.361870511333	-0.184891668612269	0.265254362061011	-0.6970353557079	0.485780667847112	0.823598078478133
159	PAS_chr1-3_0172	194.372573331242	-0.145629655689976	0.210183530502272	-0.69286901472236	0.488391756369154	0.824113018818186
2348	PAS_chr2-2_0319	24.3112905670511	0.272765922320481	0.392802501629225	0.694409840031902	0.487425224535099	0.824113018818186
2635	PAS_chr2-2_0047	29.7912194792745	-0.2670236388034	0.383996411682275	-0.6953805574213	0.486816841708222	0.824113018818186
2804	PAS_chr3_0150	72.4371341789802	-0.185614658079792	0.267872129039254	-0.692922622243362	0.488358111999707	0.824113018818186
3523	PAS_chr3_0899	50.1850444508505	0.202765584941368	0.292319525816685	0.693643657141548	0.487905708075318	0.824113018818186
3540	PAS_chr3_0918	68.442061916923	0.210145136446254	0.302338021654565	0.695066850329378	0.487013408124062	0.824113018818186
87	PAS_chr1-3_0298	30.0970416349579	-0.255756457206581	0.370254258271797	-0.690758989242561	0.489717011863951	0.82504996574249
2325	PAS_chr2-2_0343	39.581135873246	0.258118293177264	0.373554305922527	0.690979300960853	0.489578549021609	0.82504996574249
289	PAS_chr1-1_0025	21.911793053059	0.27443320525787	0.398625610319109	0.688448504445512	0.491170388026988	0.825661218314746
873	PAS_chr1-4_0695	36.2354597299169	-0.261184764622056	0.379937638577238	-0.687441143236351	0.491804778156507	0.825661218314746
879	PAS_chr1-4_0167	76.611121315434	0.219993862530001	0.319980778644451	0.687522117615849	0.491753767939136	0.825661218314746
997	PAS_chr1-4_0666	23.6111749565613	-0.295772700695561	0.430451895106218	-0.687121381176812	0.49200624161826	0.825661218314746
2569	PAS_chr2-2_0109	167.008044700836	-0.171514615021765	0.249043624485234	-0.688693056793888	0.491016446447592	0.825661218314746
3239	PAS_chr3_0595	31.1592228146123	0.277039973437858	0.403772120286602	0.686129525835543	0.49263143351682	0.826063507063024
1975	PAS_chr2-1_0552	20.6142403598011	0.313827833711291	0.460946672883768	0.680833276760469	0.495976991396803	0.82631155030467
2808	PAS_chr3_0157	22.9722321040578	-0.315354065306785	0.462826731882739	-0.681365279019108	0.49564038702737	0.82631155030467
3018	PAS_chr3_0363	41.045264022032	-0.266444789507171	0.388951581653123	-0.685033310250924	0.493322901486445	0.82631155030467
3667	PAS_chr3_1048	52.9149042441338	0.206577243211889	0.30342282881436	0.680823008667806	0.495983489344933	0.82631155030467
3754	PAS_chr3_1132	54.055029057028	-0.208422919914849	0.306289818969573	-0.680476160180674	0.496203011851828	0.82631155030467
3851	PAS_chr4_0082	86.4857830684032	0.185835734640923	0.273056174207747	0.680576936888947	0.496139224321891	0.82631155030467
4059	PAS_chr4_0288	75.5605649839265	0.18164793081293	0.266892525384577	0.680603289849298	0.496122544698602	0.82631155030467
4145	PAS_chr4_0952	37.389766562454	-0.246634186324735	0.362214626185021	-0.680906204485385	0.495930841915272	0.82631155030467
4666	PAS_FragD_0027	126.921056632951	0.157632401856061	0.231675221855258	0.680402507414211	0.496249633804064	0.82631155030467
4648	PAS_chr4_0892	73.2801865915153	-0.194955374697404	0.28763326221236	-0.677791480713618	0.4979039134362	0.828422427402001
4	PAS_chr1-3_0011	25.5583722231152	-0.280105240462724	0.416107089383021	-0.673156616672999	0.500847657996286	0.828689078771587
5	PAS_chr1-3_0013	31.9568440779681	-0.509749779985423	0.75749504153935	-0.672941408236192	0.500984567231794	0.828689078771587
427	PAS_chr1-1_0159	121.254694114834	-0.173775636882947	0.257194315806195	-0.675658932578793	0.499257215547395	0.828689078771587
1135	PAS_chr1-4_0680	106.998363586562	-0.219203940980742	0.324274782695963	-0.675982076553469	0.499052024818031	0.828689078771587
2466	PAS_chr2-2_0208	1565.72016368109	-0.119625722602434	0.17676122161852	-0.67676451603512	0.498555375194212	0.828689078771587
3054	PAS_chr3_0398	42.4220148955646	-0.213479434119706	0.317361673588058	-0.672669234775987	0.501157744324767	0.828689078771587
3679	PAS_chr3_1060	39.0571181221282	0.222177355728048	0.329250523438412	0.674797274148016	0.499804572456815	0.828689078771587
4539	PAS_chr4_0780	40.7693513096245	0.214209492723321	0.318097448136905	0.673408397262992	0.500687507814294	0.828689078771587
301	PAS_chr1-1_0033	34.956543969846	0.239376338720856	0.356303745217061	0.671832227233613	0.501690509731777	0.828930425871395
3908	PAS_chr4_0143	103.440724577197	0.185666085806846	0.277242092261102	0.669689383356656	0.503055820913245	0.830545935452299
326	PAS_chr1-1_0059	201.853539302744	0.154101078658803	0.23054099346054	0.66843243947927	0.503857594228761	0.831229272080242
1594	PAS_chr2-1_0168	85.6169999309507	0.174973012820615	0.262171763543362	0.66739838972657	0.504517694198458	0.831678014359458
4431	PAS_chr4_0669	44.477525154884	-0.218888010709678	0.328282894903147	-0.666766420389515	0.504921344957467	0.831703645075981
892	PAS_chr1-4_0182	80.9728900094171	-0.205733190056469	0.309598305657213	-0.66451652446786	0.506359776341325	0.83200759485407
973	PAS_chr1-4_0267	35.6078749541557	-0.278361015452865	0.419187362058346	-0.664049159511925	0.506658848009595	0.83200759485407
2714	PAS_chr3_0055	25.5946781609879	0.257941022777517	0.388031852565946	0.664741878976752	0.506215602844181	0.83200759485407
2766	PAS_chr3_0107	26.1372804512117	-0.26065874247207	0.392472818555752	-0.66414470034195	0.506597702894399	0.83200759485407
1553	PAS_chr2-1_0812	623.824205351766	-0.119742940829382	0.18089409123043	-0.661950536995975	0.50800292204955	0.833197170090703
4183	PAS_chr4_0416	235.149093915096	0.145068657283651	0.21923492411296	0.661704141667248	0.50816084988733	0.833197170090703
871	PAS_chr1-4_0162	92.0383648789863	0.16269547770638	0.246146459157937	0.660970213680744	0.508631415835907	0.833331134660818
197	PAS_chr1-3_0216	25.1363032417605	0.25552980124116	0.387540582759427	0.659362690280581	0.509662894581873	0.83382406909845
4651	PAS_chr4_0895	63.7333441798357	0.191501083249706	0.290466247521357	0.659288591648245	0.509710466877727	0.83382406909845
2136	PAS_chr2-1_0719	28.6522199517192	0.255346856033218	0.388998023801622	0.656421987797649	0.511552646897757	0.836199330512505
1909	PAS_chr2-1_0484	29.1831391373666	0.281066287342707	0.430652518259625	0.652652139313075	0.513980564014032	0.839527704788164
1300	PAS_chr1-4_0594	126.115509372706	-0.146716525692438	0.225696457872548	-0.6500612684639	0.515652646359074	0.84044699779842
2836	PAS_chr3_0182	26.7796763379295	0.253680877310169	0.390304026616931	0.649957110381408	0.515719926320542	0.84044699779842
3160	PAS_chr3_0511	34.866961868055	0.223302181220697	0.34342421769776	0.650222581033059	0.515548456970006	0.84044699779842
387	PAS_chr1-1_0119	24.8460272303246	-0.251216703008401	0.38944377092273	-0.645065402928848	0.518884802931777	0.841127180546746
603	PAS_chr1-1_0336	29.2172309161143	0.253750019682746	0.391520477891402	0.648114298003922	0.516911026932328	0.841127180546746
914	PAS_chr1-4_0204	86.4261468349084	0.174757316480679	0.269898783134775	0.647492050356574	0.517313537890643	0.841127180546746
983	PAS_chr1-4_0276	32.2707557870017	-0.225006490452368	0.348246810447276	-0.64611213571024	0.518206736580517	0.841127180546746
1174	PAS_chr1-4_0463	124.99685444486	0.154477882840804	0.23900808705311	0.646329104364061	0.518066243113161	0.841127180546746
1471	PAS_chr2-1_0042	150.191719707436	-0.34564309690786	0.53518526426239	-0.645838217134466	0.518384134896093	0.841127180546746
1542	PAS_chr2-1_0114	24.3491487104612	0.258225385481258	0.400139308545445	0.645338710710375	0.518707711818664	0.841127180546746
4534	PAS_chr4_0776	137.691612042725	0.150896387034817	0.234455196711103	0.643604360882444	0.519832021688152	0.84202571615851
4683	PAS_FragD_0009	32.0616981006755	-0.246501761936069	0.384690794833888	-0.640778945704977	0.521666313936537	0.844358693932024
775	PAS_chr1-4_0063	102.030601822654	-0.177437612257766	0.280308014791067	-0.633009414268882	0.526727495225969	0.846159686858509
1667	PAS_chr2-1_0238	1291.51075390011	0.122561047785182	0.193062025899025	0.634827316322079	0.525541045485824	0.846159686858509
1854	PAS_chr2-1_0431	33.4687377953409	0.219450853559764	0.346369316651879	0.633574751023125	0.52635838298007	0.846159686858509
2257	PAS_chr2-2_0416	24.6654061660807	-0.275406924681665	0.434584849880391	-0.633724173213732	0.526260846289618	0.846159686858509
3111	PAS_chr3_0460	31.0089604183666	0.230475544422896	0.363856500516728	0.633424287035103	0.526456609044281	0.846159686858509
3223	PAS_chr3_0577	43.9564326677751	0.217064840296471	0.341126942691631	0.636316904738571	0.524569888850548	0.846159686858509
3362	PAS_chr3_0728	89.3582332299455	0.16436057788668	0.259477576820218	0.633428829962287	0.526453643188544	0.846159686858509
3425	PAS_chr3_0796	24.5468739309217	-0.26292424152786	0.41346384433196	-0.635906247020633	0.524837530709375	0.846159686858509
3655	PAS_chr3_1035	57.11187437359	0.183007337423624	0.287246075097029	0.637109966991912	0.524053216793492	0.846159686858509
3699	PAS_chr3_1077	24.1801982934895	-0.251869466450235	0.395494538252434	-0.636846889373408	0.524224580288583	0.846159686858509
3998	PAS_chr4_0231	45.5523678587517	-0.20125002373187	0.319140263353935	-0.630600544152209	0.528301742981305	0.848052910268867
585	PAS_chr1-1_0319	92.485305777623	-0.184800375407919	0.296067942018271	-0.624182321625738	0.5325078554453	0.851186969820502	FBA2
674	PAS_chr1-1_0412	29.3799862136175	-0.230387689407244	0.369719797077974	-0.623141339003427	0.533191646199343	0.851186969820502
752	PAS_chr1-4_0039	50.6328235645214	0.194111198444095	0.311153499829299	0.623843853758951	0.532730136287479	0.851186969820502
1206	PAS_chr1-4_0685	24.5002716674013	-0.256438542329449	0.411328925701741	-0.623439117227061	0.532995999146661	0.851186969820502
1209	PAS_chr1-4_0499	165.263934120008	0.153203129936519	0.246243293149953	0.622161635254057	0.533835589973484	0.851186969820502
1579	PAS_chr2-1_0152	21.8346238516605	0.26430618044793	0.42592769745272	0.620542364416837	0.534900771651044	0.851186969820502
3189	PAS_chr3_0540	21.042555609195	-0.281552790595164	0.453045371208952	-0.621467094661712	0.534292338373183	0.851186969820502
3197	PAS_chr3_1198	29.1305346599413	0.241680838057101	0.38743867773941	0.623791200886905	0.532764719047081	0.851186969820502
3709	PAS_chr3_1086	60.001288494345	0.17986803467021	0.287965995815046	0.624615535459733	0.532223420921959	0.851186969820502
3974	PAS_chr4_0211	55.1844086317806	-0.203074516558121	0.327349196589744	-0.620360516151281	0.535020461198421	0.851186969820502
4093	PAS_chr4_0320	67.0421975258689	-0.170313034939946	0.273214235179215	-0.623368086323281	0.533042664764962	0.851186969820502
4559	PAS_chr4_0800	30.7091259565769	0.238559196598286	0.383907941500317	0.621396878809004	0.534338525166475	0.851186969820502
2465	PAS_chr2-2_0209	22.2189746466287	0.273679047322373	0.443673943844687	0.616847239102637	0.537335490130606	0.854235871921282
2366	PAS_chr2-2_0301	56.2164285838791	0.190161489579775	0.308797283281941	0.615813350294768	0.5380177151999	0.854457680544014
2575	PAS_chr2-2_0103	30.0148917050984	-0.233088793936425	0.37874291419425	-0.615427471250006	0.538272453912468	0.854457680544014
2719	PAS_chr3_0060	23.9598517637649	0.255495938832056	0.415990462293764	0.614187011459964	0.539091755310693	0.855124819859967
4230	PAS_chr4_0465	29.6453101847049	-0.244734825355854	0.399329840030421	-0.61286385544644	0.539966364332551	0.855878638139539
2505	PAS_chr2-2_0468	23.8444504696737	-0.252586681193876	0.412733335514549	-0.61198517168229	0.540547568324452	0.856166621522026
1222	PAS_chr1-4_0514	45.2597279817522	-0.19043945167987	0.312425626449392	-0.609551315761601	0.542159069847193	0.856819237966471
4490	PAS_chr4_0731	240.71699614271	0.133819271468689	0.219260491080003	0.610320951164256	0.541649220906019	0.856819237966471
4674	PAS_FragD_0020	70.9373083408722	-0.178696793935298	0.292937853946338	-0.610016054695453	0.541851172516448	0.856819237966471
3507	PAS_chr3_0882	49.7448107943325	-0.214031760106129	0.35294395795095	-0.606418541200454	0.544236859384369	0.859469115446355
1250	PAS_chr1-4_0540	25.4494381929886	-0.243420532744227	0.402393352971361	-0.604931793596381	0.545224317006844	0.859761377001962
2630	PAS_chr2-2_0051	46.2093897143161	0.185599209692524	0.306514411597429	0.605515442896325	0.544836566886287	0.859761377001962
33	PAS_chr1-3_0045	73.6010828544128	0.155462998233518	0.259736955137447	0.598540158258383	0.549479571736605	0.861236215348366
41	PAS_chr1-3_0053	28.1899587753584	0.222269607445581	0.372005970443625	0.597489355293196	0.550180711800407	0.861236215348366
217	PAS_chr1-3_0238	149.948777039885	0.201473000541096	0.3355176707993	0.600484022379891	0.548183706017795	0.861236215348366
287	PAS_chr1-1_0023	243.749990615487	0.129038793507829	0.215781618841004	0.598006420569629	0.549835648976755	0.861236215348366
697	PAS_chr1-1_0436	25.6132467157349	0.226932005562277	0.380573877855436	0.596288969808061	0.550982198433322	0.861236215348366
1094	PAS_chr1-4_0381	27.4021170377926	0.221609343450841	0.369219384798454	0.600210478038174	0.548365971436745	0.861236215348366
1158	PAS_chr1-4_0445	96.6541938499989	0.148803441755908	0.249366091485686	0.596726847942153	0.550689764597569	0.861236215348366
1396	PAS_FragB_0027	58.6807513922908	-0.170777668468905	0.284523397605825	-0.600223636811402	0.548357202925021	0.861236215348366
2985	PAS_chr3_0333	23.056124769666	0.25355686949171	0.423086002169441	0.599303376125792	0.548970596929106	0.861236215348366
3950	PAS_chr4_0188	106.398777418309	-0.156483051854893	0.262254397621836	-0.596684186324066	0.550718252500893	0.861236215348366
4175	PAS_chr4_0408	25.3507419126387	0.245012850560499	0.409741895140216	0.597968754151084	0.549860782009153	0.861236215348366
4476	PAS_chr4_0717	49.2835649432025	0.186876811336413	0.31070186924035	0.601466646445729	0.547529220435321	0.861236215348366
1122	PAS_chr1-4_0410	41.3661883946695	0.192934025017697	0.324073439562762	0.595340442826792	0.551615927343334	0.861598347155077
602	PAS_chr1-1_0335	75.7540630737693	-0.173716182269323	0.294433138032103	-0.590002142525077	0.555189213102466	0.862321326949742
1026	PAS_chr1-4_0313	192.579351955303	-0.137734901269002	0.23302338779497	-0.591077584839642	0.554468437929472	0.862321326949742
1067	PAS_chr1-4_0355	136.158797144562	-0.145759576824344	0.245460168629497	-0.593821708989196	0.552631367574196	0.862321326949742
1098	PAS_chr1-4_0700	69.6588511366592	-0.162451553393418	0.274842742476684	-0.591070922701186	0.554472901570394	0.862321326949742
1237	PAS_chr1-4_0528	45.6287828571832	0.188829215845655	0.320478370602919	0.589210483972471	0.555720085139014	0.862321326949742
1307	PAS_chr1-4_0601	46.2713280386242	0.192071154521578	0.324936654111306	0.591103379970746	0.554451155325837	0.862321326949742
2167	PAS_chr2-1_0749	134.242209607329	0.148409139028154	0.252027950465729	0.5888598417513	0.555955298688607	0.862321326949742
2516	PAS_chr2-2_0164	49.1143276175588	0.196222428566906	0.333406348362915	0.588538369261394	0.556170987633145	0.862321326949742
3123	PAS_chr3_0472	23.9540514431381	0.241874915968177	0.410488614669312	0.589236600783753	0.555702567721486	0.862321326949742
3626	PAS_chr3_1005	36.5637357078999	0.195041254573898	0.331679947756172	0.588040536949428	0.556505084074425	0.862321326949742
4608	PAS_chr4_0850	45.1470053192618	0.197828821599444	0.336097267648835	0.58860586098588	0.556125701309979	0.862321326949742
1226	PAS_chr1-4_0518	36.6147869967713	0.192121304591141	0.327646554837933	0.586367540736608	0.557628552195545	0.863437852135154
696	PAS_chr1-1_0435	33.8843483259484	0.215485452286852	0.36840969988502	0.584907108455898	0.558610178611881	0.863709677319813
1010	PAS_chr1-4_0298	78.7618075282891	0.154444412481094	0.263978535608059	0.585064282311214	0.55850449423601	0.863709677319813
1200	PAS_chr1-4_0490	69.9297109309453	-0.185004499437708	0.316713991074083	-0.584137438356594	0.55912784834995	0.863886790925698
633	PAS_chr1-1_0369	71.3534389034273	-0.161807604046794	0.277762349034812	-0.582539730849248	0.560203187842697	0.864348907843326
930	PAS_chr1-4_0219	33.5622218426242	0.20420493819023	0.350569699027958	0.582494547464997	0.5602336131565	0.864348907843326
4597	PAS_chr4_0837	37.1502360859662	0.195157989693554	0.336020176223932	0.580792474686091	0.561380327511534	0.865494994141883
194	PAS_chr1-3_0211	95.6915455390777	0.157884330109494	0.272237674625679	0.579950333202712	0.561948111575374	0.865700225931423
4575	PAS_chr4_0814	221.160702048948	-0.125916797234757	0.217323896380036	-0.579396924738388	0.562321378673141	0.865700225931423
650	PAS_chr1-1_0388	94.8927477503839	-0.145068695584156	0.252664592682063	-0.574155223113122	0.565862766695215	0.866721258785273
719	PAS_chr1-4_0003	141.602293229985	-0.151500594840642	0.264340742862027	-0.573126159820612	0.566559275920959	0.866721258785273
1219	PAS_chr1-4_0511	20.8795146535112	-0.239189755403998	0.4183978247136	-0.571680207868497	0.567538645482765	0.866721258785273
2023	PAS_chr2-1_0866	173.348389833816	0.123942970567829	0.215144138578826	0.576092713408589	0.564552516344085	0.866721258785273
2265	PAS_chr2-2_0409	47.3007661094284	0.185450636326517	0.324477794323798	0.571535678467582	0.567636582420576	0.866721258785273
3417	PAS_chr3_0787	55.9033546768976	0.168874164381363	0.293568508946789	0.575246183547474	0.565124812405501	0.866721258785273
3571	PAS_chr3_0949	98.918633233498	0.140615178126712	0.245845664135875	0.57196525560441	0.567345513329314	0.866721258785273
3595	PAS_chr3_0970	22.9156383915337	0.239778844998039	0.417037102770215	0.57495806345594	0.565319659436933	0.866721258785273
3641	PAS_chr3_1022	97.1200343812006	0.163163017284102	0.284369133756396	0.573771896860911	0.566122168445469	0.866721258785273
4080	PAS_chr4_0309	34.1968754670331	-0.224649112873931	0.393000163989661	-0.571626002883401	0.56757537526353	0.866721258785273
4511	PAS_chr4_0754	30.017137724152	-0.226836327149277	0.39509587750269	-0.574129825355449	0.565879951915314	0.866721258785273
4605	PAS_chr4_0846	54.8768633001634	-0.164050587234202	0.287183999650513	-0.571238604636201	0.567837912895251	0.866721258785273
2350	PAS_chr2-2_0316	76.2644978927124	-0.149729947250318	0.263475564837972	-0.568287792996655	0.569839566448364	0.868690824869539
4227	PAS_chr4_0462	20.662415359494	-0.258394301037683	0.454806384694515	-0.568141322842778	0.569939010623692	0.868690824869539
83	PAS_chr1-3_0094	189.580670723614	0.130098008881752	0.230533159074258	0.564335340756104	0.572525934236319	0.869357728742208
446	PAS_chr1-1_0180	35.6221642154215	0.197668460277754	0.351226038038389	0.562795575697461	0.573574093362735	0.869357728742208
586	PAS_chr1-1_0320	39.3680968978381	0.232673802741974	0.414204046549109	0.561737155106203	0.574295115579258	0.869357728742208
898	PAS_chr1-4_0188	43.0856511795637	0.192625849929674	0.342830555337765	0.561868966842509	0.574205298785418	0.869357728742208
1632	PAS_chr2-1_0205	32.3760236626417	0.206146039810742	0.366282049384032	0.562806831941158	0.5735664276383	0.869357728742208
2592	PAS_chr2-2_0085	65.9836120005878	0.159517906829909	0.283238377050918	0.563193125489602	0.573303383531724	0.869357728742208
2926	PAS_chr3_1173	24.3750473760442	-0.22368795431625	0.397046423418525	-0.56337984961638	0.57317625545168	0.869357728742208
3017	PAS_chr3_0362	103.547423206748	-0.355275965200601	0.627848757036962	-0.565862337415897	0.571487365997642	0.869357728742208
3251	PAS_chr3_0608	65.6236724896606	0.160679427842887	0.285217951979118	0.56335664262343	0.573192054827125	0.869357728742208
4497	PAS_chr4_0737	161.18460479138	-0.126241732151042	0.224815672724303	-0.561534392247892	0.574433291600078	0.869357728742208
1008	PAS_chr1-4_0667	53.2402755145849	-0.163604760614976	0.292474797413706	-0.559380712668916	0.575901921598153	0.87070806062613
1765	PAS_chr2-1_0334	58.196079240805	-0.161191314139199	0.288338731364154	-0.559034554173803	0.576138138109124	0.87070806062613
2279	PAS_chr2-2_0394	66.0375315680716	0.187287599896447	0.335715252318231	0.557876350875217	0.576928821454314	0.87128855840493
4555	PAS_chr4_0796	29.1754062609773	-0.228475797896233	0.41000283571976	-0.557254189462234	0.577353770252355	0.871316288486476
1916	PAS_chr2-1_0491	38.7770007561614	-0.187325398666672	0.336603143155646	-0.556517080947319	0.577857420939355	0.871462669298408
1034	PAS_chr1-4_0321	25.3345434832065	0.217778314818064	0.392176608292832	0.555306742454798	0.578684867829211	0.871733987823472
2667	PAS_chr2-2_0448	25.3962135019653	0.219210345417671	0.395351600722009	0.554469350869805	0.579257675529922	0.871733987823472
3746	PAS_chr3_1124	23.1732763320235	-0.22519009273397	0.40601164162943	-0.554639497109552	0.579141267485507	0.871733987823472
1738	PAS_chr2-1_0307	20.8102545659685	-0.236094365555144	0.427492598657027	-0.55227708338539	0.580758529018848	0.872766849710654
3486	PAS_chr3_0862	54.1125541668309	0.166138413551848	0.300550111465583	0.552781074482725	0.58041332933189	0.872766849710654
642	PAS_chr1-1_0378	98.1693785124198	0.145152122075779	0.263382824700888	0.551107014060698	0.58156031749471	0.873004745340605
3476	PAS_chr3_1227	22.1697914479075	-0.234532756676019	0.425759640525267	-0.550857184083188	0.581731580189633	0.873004745340605
883	PAS_chr1-4_0171	29.0336800435999	-0.211515912324448	0.384867979760933	-0.549580436532637	0.582607180199932	0.873083842420571
1092	PAS_chr1-4_0379	22.4387218217469	-0.23591166704253	0.429712821383526	-0.548998436404519	0.583006522866933	0.873083842420571
3020	PAS_chr3_1182	137.10193494439	0.155269007938492	0.282236696025065	0.55013756228461	0.582225024865833	0.873083842420571
208	PAS_chr1-3_0229	27.5425371924164	0.222742074681586	0.407669466742722	0.546379095940874	0.584805376352661	0.873601362062983
1065	PAS_chr1-4_0353	61.9156777696018	-0.175988336614745	0.322952721407745	-0.544935295320055	0.58579802019809	0.873601362062983
2189	PAS_chr2-1_0768	31.6152583681692	-0.199490178668981	0.365407929516688	-0.545938285829866	0.585108359801369	0.873601362062983
2756	PAS_chr3_0097	22.1268641708518	0.236028291182548	0.431152632549858	0.547435579336871	0.584079517253525	0.873601362062983
2890	PAS_chr3_0231	27.8321182714722	0.203319918057558	0.372594674221387	0.545686592226355	0.585281389893941	0.873601362062983
3101	PAS_chr3_0451	96.3364606076363	-0.139274745266297	0.255555649909031	-0.544987932436143	0.585761817321955	0.873601362062983
286	PAS_chr1-1_0022	43.0213296523123	-0.174521655003714	0.321798043494538	-0.542332865385108	0.587589218862808	0.874583934978288
2502	PAS_chr2-2_0469	25.7349339329057	-0.212596692636082	0.391520756391614	-0.543002354703857	0.587128181181608	0.874583934978288
3260	PAS_chr3_0618	26.3139471687003	-0.2108638741555	0.388904741700537	-0.542199288271648	0.587681225557039	0.874583934978288
2198	PAS_chr2-1_0776	33.0150386397899	0.196744737540689	0.363776669008504	0.540839350904304	0.58861831705783	0.874617344373842	KpFOX2
3169	PAS_chr3_0520	49.7071403292358	0.171145640148642	0.316707599198927	0.540390065099587	0.588928057830823	0.874617344373842
3742	PAS_chr3_1120	33.4646626252143	0.195350322720571	0.361230553717717	0.540791250103466	0.588651474489647	0.874617344373842
783	PAS_chr1-4_0072	820.499149512439	-0.131539798491659	0.244189504399097	-0.538679165656006	0.590108252009248	0.87515708239157
4522	PAS_chr4_0764	22.6057119365264	-0.220631507552294	0.409481329652088	-0.538807246083117	0.590019863238898	0.87515708239157
905	PAS_chr1-4_0195	42.3470198387365	0.181746686758285	0.337901828640267	0.537868313674543	0.590667965395441	0.875381362270007
812	PAS_chr1-4_0102	30.8446641750587	0.189643030624512	0.353257747526581	0.536840400394169	0.591377862366537	0.875594184639596
1504	PAS_chr2-1_0079	37.0494448925148	-0.177799715211795	0.331477828560778	-0.536384940084146	0.591692537454656	0.875594184639596
3964	PAS_chr4_0925	22.3466210984853	0.225912969301094	0.421569057116352	0.535886032163747	0.592037318498728	0.875594184639596
113	PAS_chr1-3_0126	84.4849110537111	0.129143333935877	0.251727098056207	0.513029129295572	0.607930944624768	0.876546660129681
146	PAS_chr1-3_0160	26.6406282999973	-0.192992282753993	0.378236718630238	-0.510242060720342	0.609881888454984	0.876546660129681
417	PAS_chr1-1_0150	35.3235094322446	-0.174364521994364	0.342558135036948	-0.509007097366282	0.61074724929006	0.876546660129681
520	PAS_chr1-1_0254	102.479384671637	-0.121824699520798	0.237210350868214	-0.513572443508082	0.607550949811835	0.876546660129681
538	PAS_chr1-1_0274	23.5534191549863	0.219871878399977	0.432619333036073	0.50823405615496	0.611289210019547	0.876546660129681
593	PAS_chr1-1_0496	81.9908407727908	0.139515843391895	0.274971754577892	0.507382453176202	0.611886495053958	0.876546660129681
753	PAS_chr1-4_0040	42.8008858826568	-0.166144183476971	0.316780850796692	-0.524476725973572	0.599947003480036	0.876546660129681
780	PAS_chr1-4_0069	41.2328089178356	-0.189051760128358	0.358363499781611	-0.527541895989875	0.5978173303568	0.876546660129681
851	PAS_chr1-4_0144	32.5583998831162	0.192022659870956	0.365589451399019	0.525241248444487	0.599415493715444	0.876546660129681
869	PAS_chr1-4_0160	141.815969454246	0.122042554299367	0.237595880082733	0.513656020705705	0.607492505195026	0.876546660129681
903	PAS_chr1-4_0193	31.873879470648	0.179064515662659	0.346311647022623	0.517061777165586	0.60511303472467	0.876546660129681
980	PAS_chr1-4_0274	89.7505599358796	0.139544148384674	0.271715012443319	0.513568047381203	0.607554024044553	0.876546660129681
1530	PAS_chr2-1_0104	65.0204335059703	0.140222640729313	0.272051002241057	0.515427767492897	0.606254132944414	0.876546660129681
1612	PAS_chr2-1_0185	187.177844555093	0.174754637121541	0.331369573803536	0.527370799665363	0.597936117151638	0.876546660129681
1684	PAS_chr2-1_0253	121.221816684873	-0.124681785343414	0.239551472697596	-0.520480145412462	0.602728962718246	0.876546660129681
1873	PAS_chr2-1_0447	56.7057583649704	0.152813451934785	0.299780740044361	0.509750732859528	0.610226105403701	0.876546660129681
1890	PAS_chr2-1_0466	54.955991178937	0.153156717149338	0.300227021882457	0.510136350116083	0.609955940439965	0.876546660129681
1930	PAS_chr2-1_0506	28.3412152803989	0.198235231621542	0.380774866384887	0.520610074671173	0.602638429649939	0.876546660129681
2005	PAS_chr2-1_0582	96.8575101444682	0.12452174069014	0.24570547007749	0.506792708566351	0.612300272933823	0.876546660129681
2090	PAS_chr2-1_0666	77.7286196410691	0.130503727578188	0.255765912964849	0.510246756752624	0.609878598901206	0.876546660129681
2263	PAS_chr2-2_0410	48.2293634308	-0.153799107984482	0.299269430557356	-0.513915195742005	0.607311282892401	0.876546660129681
2338	PAS_chr2-2_0329	69.3441470925464	-0.146885693301542	0.283627234117638	-0.517882895690542	0.604539976524287	0.876546660129681
2407	PAS_chr2-2_0266	164.616590941767	0.124508958552838	0.240804438490157	0.517054250883033	0.605118288439366	0.876546660129681
2456	PAS_chr2-2_0218	37.9822361538241	0.172926323553089	0.337389756327361	0.51254171269297	0.608271934709656	0.876546660129681
2460	PAS_chr2-2_0214	59.3799324402118	0.164471883569259	0.316288765350245	0.520005455733245	0.603059772534952	0.876546660129681
2491	PAS_chr2-2_0185	39.926360118933	0.17063612847952	0.328372842928975	0.519641414184873	0.603313527334984	0.876546660129681
2565	PAS_chr2-2_0112	47.5638228393896	-0.163038474168192	0.320404636106844	-0.508851794871732	0.610856111053154	0.876546660129681
2666	PAS_chr2-2_0017	54.1144603952402	-0.14846380612637	0.289382160179152	-0.513037175596652	0.607925316256161	0.876546660129681
2847	PAS_chr3_0194	123.464124686387	0.140026298419133	0.273902020494568	0.511227694364197	0.609191628490009	0.876546660129681
2950	PAS_chr3_0290	495.036888574226	0.117954020836406	0.226579455739995	0.520585683512986	0.602655424634398	0.876546660129681
2966	PAS_chr3_0306	45.6579736314321	-0.157958058682369	0.309559407682821	-0.510267350182474	0.609864173370497	0.876546660129681
2989	PAS_chr3_0337	46.8996594563098	-0.176665122414777	0.343586632551926	-0.514179265656029	0.607126662781094	0.876546660129681
3028	PAS_chr3_0372	49.8923136539039	-0.179849466311124	0.347508911058746	-0.517539149609665	0.604779847107214	0.876546660129681
3064	PAS_chr3_0409	37.112161713428	-0.191375287298222	0.369807849305635	-0.517499257134632	0.604807687370563	0.876546660129681
3307	PAS_chr3_0669	43.9595919179443	0.175331371967065	0.330412326456925	0.530644161636391	0.595665386957953	0.876546660129681
3409	PAS_chr3_0779	73.3318589873086	-0.143161721711039	0.274884809633479	-0.520806231169795	0.602501761877923	0.876546660129681
3418	PAS_chr3_0788	60.6421982448931	0.147529753735382	0.285679992101797	0.516416122284169	0.605563807859193	0.876546660129681
3569	PAS_chr3_0947	20.8947988784756	0.218284031879088	0.410854583716767	0.531292677580463	0.5952159788088	0.876546660129681
3597	PAS_chr3_0972	146.089822848565	0.113114066589116	0.220871133626945	0.512126979798852	0.608562143341733	0.876546660129681
3688	PAS_chr3_1249	21.7139751834656	-0.213973182581035	0.414234048870088	-0.516551411369232	0.605469341407219	0.876546660129681
4061	PAS_chr4_0291	25.885349093746	0.210388811728487	0.404435861917591	0.520203155899553	0.602921985954018	0.876546660129681
4067	PAS_chr4_0298	41.4291901233639	0.163939699631711	0.316724954302934	0.517609040287079	0.604731073006674	0.876546660129681
4170	PAS_chr4_0402	35.8473928806495	0.176411666486045	0.342029754774746	0.515778712300121	0.606008972159607	0.876546660129681
4310	PAS_chr4_0540	44.1728640346351	0.546817693873693	1.07902073426182	0.506772183805888	0.612314675788209	0.876546660129681
4360	PAS_chr4_0592	35.0642857186796	0.175051879957517	0.340913623805351	0.513478687074898	0.607616515641902	0.876546660129681
4525	PAS_chr4_0769	27.3753420225834	0.216820590150174	0.417424948671121	0.519424128434166	0.603465009032096	0.876546660129681
4570	PAS_chr4_0809	28.7645061787147	0.190278559995745	0.37120689528348	0.512594357522467	0.608235100991477	0.876546660129681
4652	PAS_chr4_0896	27.5969140681353	0.202575766329011	0.387073475523863	0.523352229327639	0.600729161043349	0.876546660129681
349	PAS_chr1-1_0082	74.7431487172628	0.139437327448856	0.275548917129867	0.506034750204222	0.612832254931495	0.876701950813214
3379	PAS_chr3_0747	76.2215880750078	0.138148015304809	0.27365441759784	0.504826549183759	0.613680666877792	0.876745112746072
4428	PAS_chr4_0667	43.9445207664797	-0.162207809897919	0.321067035393209	-0.505214774538481	0.613407994309888	0.876745112746072
1356	PAS_chr1-4_0649	109.850038155323	-0.130577189113405	0.259691459509394	-0.502816647725305	0.615093187968568	0.877593010530387
1555	PAS_chr2-1_0125	142.10916977463	0.112204033326981	0.22313446833292	0.502853880735141	0.61506700830984	0.877593010530387
436	PAS_chr1-1_0169	37.4015242173627	0.173808176975657	0.346643477510893	0.501403281041673	0.616087331141191	0.877855628435721
3660	PAS_chr3_1040	74.7862929171278	0.155055515382161	0.309512952734625	0.500966159936787	0.61639493902395	0.877855628435721
4301	PAS_chr4_0976	44.0593484965884	0.155775121270929	0.311047514134667	0.500808121563983	0.616506169293402	0.877855628435721
1537	PAS_chr2-1_0810	44.6166427820566	-0.156722326824297	0.314430062050115	-0.498433024509336	0.618178864822134	0.879141549897333
2698	PAS_chr3_0038	53.2933954145801	0.151361048941703	0.303717781244879	0.498360841177305	0.618229732008997	0.879141549897333
3332	PAS_chr3_0694	89.65947376587	-0.137100837241764	0.275863927108414	-0.496987187411	0.619198086594358	0.879934681413601
1641	PAS_chr2-1_0214	41.0126281151644	0.161900477974178	0.326233009260322	0.496272521107719	0.6197021508495	0.8800674017697
1321	PAS_chr1-4_0617	28.5330640183144	-0.195212205373457	0.394297902434185	-0.495088115276091	0.620537922670346	0.880670707471888
385	PAS_chr1-1_0118	1584.4436008346	0.0850019561224478	0.172251274354813	0.49347650077384	0.621675939971284	0.881701879125388
2399	PAS_chr2-2_0274	25.3997594343082	0.195947720265122	0.398736750983499	0.491421269250476	0.623128524011238	0.88317753105561
459	PAS_chr1-1_0195	31.6819083280313	-0.178947595815527	0.366952964494969	-0.48765812823398	0.625792014897844	0.884612327128021
469	PAS_chr1-1_0203	68.1237900629528	0.128922289990919	0.264209723200157	0.487954373629358	0.6255821593714	0.884612327128021
887	PAS_chr1-4_0175	125.193989315081	0.1402686236641	0.287018114311922	0.488710003549323	0.625047020546784	0.884612327128021
1236	PAS_chr1-4_0527	94.196255181565	-0.125966943102136	0.25796612736193	-0.488308075135006	0.625331642579872	0.884612327128021
1096	PAS_chr1-4_0383	33.4130951641723	-0.173308848456746	0.35706542798092	-0.485370004698431	0.627413905613738	0.886320368971813
2433	PAS_chr2-2_0241	27.4512026323384	0.191409241202465	0.394925217708795	0.484672116693252	0.627908948578367	0.886435360213069
420	PAS_chr1-1_0153	87.590108025527	0.129478523121351	0.268530889059304	0.482173665662559	0.629682582587463	0.887627977245204
2655	PAS_chr2-2_0029	94.9874257154566	0.125290817846738	0.260123798419933	0.481658420366728	0.630048618039595	0.887627977245204
2916	PAS_chr3_0257	38.4954636517512	0.160990498373133	0.333964222231725	0.482059117881878	0.629763950628023	0.887627977245204
3193	PAS_chr3_0546	52.6766756930708	0.150643957314875	0.313092051732022	0.481149094911589	0.630410537268875	0.887627977245204
2223	PAS_chr2-1_0799	20.6336917040585	-0.204953504393082	0.426485328335987	-0.480564021258942	0.630826391529121	0.887630306662446
3065	PAS_chr3_0410	119.116705301251	0.116246330434239	0.242585026102194	0.479198293077114	0.631797568450424	0.888413509966705
3971	PAS_chr4_0208	393.967662263547	-0.113373629738835	0.237213709043852	-0.477938775949398	0.632693781685112	0.889090343705702
617	PAS_chr1-1_0352	49.3195266883957	0.158005511458965	0.332460818621558	0.475260549841884	0.63460127403233	0.8895925450275
955	PAS_chr1-4_0247	20.6486879495759	0.203565567793863	0.42714567107139	0.476571768322662	0.633667090781899	0.8895925450275
4010	PAS_chr4_0932	122.70021541999	-0.119144719827293	0.250775173119484	-0.475105722568976	0.634711619853965	0.8895925450275
4395	PAS_chr4_0631	29.9090308438551	0.177235881429279	0.37221450822165	0.476165967511768	0.633956143017713	0.8895925450275
410	PAS_chr1-1_0141	30.9920480845062	0.17573220258861	0.371310364692116	0.473275780314736	0.63601643909181	0.890838603518193
3013	PAS_chr3_0359	91.9585206642315	-0.117006847934495	0.247532312781147	-0.472693227885546	0.636432058789713	0.890838603518193
4510	PAS_chr4_0753	149.529634909547	0.12444337855413	0.264761766897115	0.470020199715952	0.638340585933418	0.892926811785454
270	PAS_chr1-1_0006	34.5011505872942	0.157605264263391	0.337184094815266	0.467416069401907	0.640202227849532	0.893489759455771
1448	PAS_chr2-1_0016	73.1151961416358	-0.144835215490256	0.309947848998453	-0.467288984125129	0.640293136738653	0.893489759455771
1685	PAS_chr2-1_0254	58.9240547561172	-0.133280586143889	0.284582844811325	-0.468336684989753	0.639543838132509	0.893489759455771
3824	PAS_chr4_0052	237.243382177019	-0.102740582601022	0.219942584942644	-0.467124557201211	0.640410765526862	0.893489759455771
339	PAS_chr1-1_0072	925.819415103527	0.0876448256709299	0.189748074526988	0.461901001574928	0.644152315732883	0.893730396422699	FBA1
1587	PAS_chr2-1_0162	26.150874869971	0.181149582192745	0.388899432187142	0.46580058287556	0.641358247840458	0.893730396422699
1862	PAS_chr2-1_0892	215.519144466894	-0.0998081347556737	0.215793541191801	-0.462516784350662	0.643710768777273	0.893730396422699
2468	PAS_chr2-2_0474	28.3674696490732	-0.181443376262229	0.392871330142155	-0.461839188409539	0.644196645794063	0.893730396422699
3022	PAS_chr3_0366	186.398524024899	0.126726912247466	0.274014101187537	0.462483177684105	0.643734863190271	0.893730396422699
3478	PAS_chr3_0855	195.679442678856	0.0981739900711292	0.212661698730328	0.461643966249049	0.64433666004343	0.893730396422699
3479	PAS_chr3_0856	232.871942112408	-0.100834203145138	0.218261929780554	-0.461987132829437	0.644090547769728	0.893730396422699
4223	PAS_chr4_0456	149.825512582249	-0.118718477562306	0.255670206769512	-0.464342244105634	0.642402562484429	0.893730396422699
4388	PAS_chr4_0622	40.1182581516376	0.154356004892455	0.331487340877989	0.46564675587195	0.641468369747312	0.893730396422699
2908	PAS_chr3_0249	27.7343983078439	0.179187830587183	0.388919395260041	0.46073256507913	0.644990488144425	0.894058613255823
4109	PAS_chr4_0338	38.5813018707194	-0.160956689780412	0.349876532216003	-0.460038542056436	0.645488556006237	0.894170637053243
1963	PAS_chr2-1_0538	99.9096382163053	-0.12211447200737	0.266060028759951	-0.458973384978267	0.646253278720662	0.894651664275438
562	PAS_chr1-1_0294	21.8082315501137	0.183885270524719	0.402286556177698	0.457100213022015	0.647599017182153	0.89471551642116
1665	PAS_chr2-1_0236	43.1538636068983	0.160162420525942	0.351754111813161	0.455324941904346	0.648875484990972	0.89471551642116
1945	PAS_chr2-1_0855	45.4160217584401	0.15391341596635	0.338819962102331	0.454263128451283	0.649639451027216	0.89471551642116
2870	PAS_chr3_0217	54.1416829880794	0.146044772187393	0.320537609449796	0.455624450553803	0.648660057724558	0.89471551642116
2995	PAS_chr3_0342	27.7162304795346	0.169842254755685	0.371494093746824	0.457186958324656	0.647536671476976	0.89471551642116
3050	PAS_chr3_0394	31.1309788438478	0.169142467542148	0.372134554760685	0.454519649890942	0.649454852171296	0.89471551642116
3135	PAS_chr3_0484	25.422834425496	-0.187318958989986	0.411511043720098	-0.455197890429879	0.648966878045288	0.89471551642116
4493	PAS_chr4_0733	237.498973017967	-0.09105235666047	0.200382731855471	-0.454392231393186	0.649546542826944	0.89471551642116
1877	PAS_chr2-1_0451	31.4611046701554	0.16567677798364	0.367796186241869	0.450458118330483	0.652380146613876	0.896839328768672
2084	PAS_chr2-1_0660	48.8158176956478	-0.147859514896142	0.327543893913014	-0.451418932374935	0.651687640734566	0.896839328768672
3180	PAS_chr3_0531	34.2123516915687	-0.152576281492297	0.338772899631899	-0.45037924125006	0.6524370105228	0.896839328768672
395	PAS_chr1-1_0476	58.6807323714556	0.161416804236875	0.360649270868275	0.447572800710947	0.654461536565056	0.89880266393501
1299	PAS_chr1-4_0593	39.4014970116662	-0.15223052082567	0.340380173907424	-0.447236744367708	0.654704133645614	0.89880266393501
3080	PAS_chr3_0425	253.046779141555	-0.095439655673044	0.213954389765901	-0.446074772186117	0.655543235346688	0.89937845924965
1946	PAS_chr2-1_0520	26.3171552930776	0.167282153863555	0.37565897622974	0.445303225660849	0.656100637099984	0.899567284264406
179	PAS_chr1-3_0195	45.7886444315322	-0.137816877965579	0.313601940185886	-0.439464366463706	0.660325096196573	0.900396113309576
262	PAS_chr1-3_0289	38.8183812312109	0.144947153659847	0.328718616995929	0.440945982872768	0.659252103200941	0.900396113309576
273	PAS_chr1-1_0009	70.0918277328233	0.13190383854859	0.29905406058928	0.441070214156853	0.659162166185412	0.900396113309576
547	PAS_chr1-1_0280	57.9920736587828	-0.134097031609695	0.304796138805671	-0.43995646445899	0.659968639099231	0.900396113309576
3600	PAS_chr3_0975	41.4678113142011	-0.152425088186939	0.34701886678256	-0.439241501766668	0.660486556286819	0.900396113309576
3672	PAS_chr3_1053	67.4646828624053	-0.119998456533905	0.271241598558395	-0.442404325780696	0.658196649311243	0.900396113309576
3752	PAS_chr3_1258	83.5593391018217	0.125738348254575	0.284717181907343	0.441625431286737	0.658760277982009	0.900396113309576
4603	PAS_chr4_0844	175.015720055887	-0.0947665774032882	0.215491351096488	-0.439769749092415	0.660103879538139	0.900396113309576
4643	PAS_chr4_0935	62.111425771583	-0.12655613612451	0.288102020387107	-0.439275420403034	0.660461982034081	0.900396113309576
739	PAS_chr1-4_0022	22.8530353631113	-0.171955921932302	0.397683570469497	-0.432393829418939	0.66545520213153	0.901172719211107
1202	PAS_chr1-4_0492	63.7211793889132	0.123823371127663	0.283302204849428	0.437071681787558	0.662059363559701	0.901172719211107
1790	PAS_chr2-1_0831	29.8855611599276	-0.1527236610718	0.352217507330089	-0.433606103880212	0.664574501549899	0.901172719211107
1844	PAS_chr2-1_0421	22.5606516467662	-0.173610516510099	0.400250797651187	-0.433754329857446	0.664466849166498	0.901172719211107
2060	PAS_chr2-1_0635	71.3032856085621	-0.117201961022866	0.271319567160212	-0.431970175426601	0.665763089819165	0.901172719211107
2176	PAS_chr2-1_0756	58.4867489073608	0.12468545066993	0.288407252263468	0.432324255688365	0.665505760502934	0.901172719211107
2391	PAS_chr2-2_0282	32.8359252662222	0.153130169780331	0.353051903471717	0.433732740921473	0.664482528176575	0.901172719211107
2398	PAS_chr2-2_0275	22.7997896149055	-0.186764668011344	0.434660590278777	-0.42967932264473	0.667428926701451	0.901172719211107
2511	PAS_chr2-2_0467	65.7465794007973	0.125845241293987	0.291774047319965	0.431310606443289	0.666242539278136	0.901172719211107
2633	PAS_chr2-2_0049	27.1909700217436	0.160277907604144	0.371099510459625	0.431900078244868	0.665814037908592	0.901172719211107
2713	PAS_chr3_0054	124.430102707086	-0.105361310390106	0.241649200021443	-0.436009349009875	0.662829946505749	0.901172719211107
3452	PAS_chr3_0825	31.9351857310467	0.166265864431231	0.384715347999424	0.432178922145523	0.665611377500998	0.901172719211107
3701	PAS_chr3_1079	20.8562261493818	0.190688966652091	0.436566569015799	0.436792416519621	0.662261899215322	0.901172719211107
3835	PAS_chr4_0066	104.575759652166	-0.108063056377168	0.251718600269371	-0.429301037990546	0.667704161542478	0.901172719211107
4361	PAS_chr4_0593	138.592774827602	0.103764401860582	0.241329778768981	0.429969324092046	0.667217955827937	0.901172719211107
4557	PAS_chr4_0798	29.9780732376402	-0.152895717545899	0.356242023504408	-0.429190571179225	0.667784544147102	0.901172719211107
2546	PAS_chr2-2_0133	20.6859928783392	-0.177597543455376	0.415560544313	-0.427368637099506	0.669110847240358	0.902394301847758
3203	PAS_chr3_0554	50.3128953075664	-0.126041164206527	0.295610419060065	-0.426375919385025	0.66983394540789	0.902801349062332
891	PAS_chr1-4_0181	85.2402194262183	0.123451225393055	0.291762407829751	0.423122451968149	0.672205922149335	0.904860107516348
2362	PAS_chr2-2_0305	156.844745710733	0.0958805790670666	0.226363551445034	0.423568982086537	0.671880180462725	0.904860107516348
1176	PAS_chr1-4_0465	184.107314916486	0.0964209931006956	0.228488754457763	0.421994479901282	0.673029046631654	0.905081916039652
3397	PAS_chr3_0768	54.4405805273776	0.122312224773811	0.290018627894528	0.421739202277353	0.673215386918901	0.905081916039652
1832	PAS_chr2-1_0408	22.8072555936565	-0.168291829371626	0.401092023063963	-0.419584084684696	0.674789316906357	0.906061094066619
2472	PAS_chr2-2_0203	33.7193549188676	0.141931626989957	0.338219208410085	0.419643897983073	0.674745614694584	0.906061094066619
2458	PAS_chr2-2_0216	96.5623733257034	0.103290318938233	0.246847599814505	0.418437606911515	0.675627195549877	0.906618083947018
2769	PAS_chr3_0111	22.2656838883295	-0.175943933341999	0.422584432086769	-0.416352141684841	0.677152343188868	0.908096039708225
944	PAS_chr1-4_0235	154.996951137394	0.110378268662115	0.268936861365934	0.410424469526052	0.681494599370294	0.908805146813842
1558	PAS_chr2-1_0129	22.983539300267	-0.166450727317929	0.405092777381374	-0.410895322286194	0.681149292569817	0.908805146813842
1915	PAS_chr2-1_0490	86.6045554536835	-0.13344096711271	0.325192834132687	-0.410344119262673	0.681553532086076	0.908805146813842
2746	PAS_chr3_0085	71.8516491072839	-0.11020688358969	0.268370508291352	-0.410651991127304	0.681327734719298	0.908805146813842
3326	PAS_chr3_0689	691.408976052907	-0.0875999914085502	0.212073707732803	-0.413063893421996	0.679559802309352	0.908805146813842
3403	PAS_chr3_0774	63.6752267999757	0.111212326826526	0.271159628401833	0.410136005429687	0.681706181731358	0.908805146813842
3676	PAS_chr3_1057	79.0306783831612	-0.113504721372595	0.273511668533338	-0.414990416976524	0.678148918408249	0.908805146813842
3757	PAS_chr3_1135	30.6204078466955	0.157538405922931	0.381052248180198	0.41342993428143	0.679291646791744	0.908805146813842
3799	PAS_chr4_0912	36.6226210642873	0.14824728705526	0.359850660320111	0.411968917670968	0.680362205497819	0.908805146813842
4156	PAS_chr4_0956	36.3576613061957	0.146696726864044	0.357934909704572	0.409841909483272	0.681921920707726	0.908805146813842
303	PAS_chr1-1_0035	23.0719838801168	-0.164249253362813	0.405816946378543	-0.404737295543107	0.685670624618625	0.909385053732373
448	PAS_chr1-1_0183	284.477622165265	-0.112393081152852	0.275729873444596	-0.407620254377099	0.683552491917402	0.909385053732373
1455	PAS_chr2-1_0025	23.5637373045801	-0.156872559517082	0.387512036089406	-0.404819837598255	0.685609945858215	0.909385053732373
1791	PAS_chr2-1_0363	298.773766273755	0.0790683989596066	0.195217817112658	0.405026549979181	0.685457995236281	0.909385053732373
1944	PAS_chr2-1_0519	26.9747076693738	-0.165319993979199	0.405860569209165	-0.407331991627893	0.683764169152148	0.909385053732373
3115	PAS_chr3_0464	27.6243234360635	0.151968843236905	0.373825168397396	0.406523840779372	0.684357743332957	0.909385053732373
3316	PAS_chr3_0678	58.0648702469104	0.113450516067355	0.280383107528603	0.404626787495682	0.685751865063703	0.909385053732373
3588	PAS_chr3_0965	71.7782885548146	0.109103526287141	0.268773447754556	0.405931192975483	0.684793157870571	0.909385053732373
1675	PAS_chr2-1_0244	21.5944405279341	0.168357549183952	0.418027427983415	0.402742829570101	0.687137422659217	0.910096104300805
3228	PAS_chr3_0583	32.9200334785368	-0.140634867488838	0.348931706953482	-0.403044104867164	0.686915778873095	0.910096104300805
1770	PAS_chr2-1_0341	20.8387161220375	0.165037613252954	0.410833169442724	0.401714431862499	0.687894202152707	0.910535685740118
1113	PAS_chr1-4_0678	130.362317994969	0.0980281948594863	0.244849711474492	0.40036067132429	0.688890886988182	0.911292080750417
1080	PAS_chr1-4_0367	554.732342985354	0.0940103017550686	0.237317737890243	0.396136852604534	0.692004072905174	0.911554669424306
1477	PAS_chr2-1_0048	84.7515437230616	0.104719763081782	0.264371525278944	0.396108328880312	0.692025114228124	0.911554669424306
2243	PAS_chr2-2_0431	35.2049077662999	0.150295777317532	0.376436206733149	0.399259621229993	0.689701916272999	0.911554669424306
2531	PAS_chr2-2_0151	3896.333211618	-0.111466356768627	0.282265712173446	-0.394898678661094	0.692917665185345	0.911554669424306
2614	PAS_chr2-2_0066	1067.26265904635	0.0985105176715438	0.249288210813318	0.395167173570492	0.69271951701363	0.911554669424306
2927	PAS_chr3_0267	60.3511894028982	-0.119351624514788	0.300159157921065	-0.397627796337885	0.690904567906707	0.911554669424306
2954	PAS_chr3_1176	30.5540677430965	0.152795287306591	0.383230421090345	0.398703440274566	0.690111732653226	0.911554669424306
3044	PAS_chr3_0388	32.2361690179474	0.139663620028997	0.352711856645368	0.395970867997842	0.692126519425947	0.911554669424306
3887	PAS_chr4_0120	69.1134642582265	0.113596929104594	0.286701963138145	0.396219571924794	0.691943054029564	0.911554669424306
4094	PAS_chr4_0321	21.8548128103013	0.183612720220175	0.466044947080795	0.393980712311732	0.693595279327792	0.911886308956723
2130	PAS_chr2-1_0713	20.8107967518162	-0.163573905560081	0.416038257958605	-0.39317034534924	0.694193670671587	0.912113449570332
4433	PAS_chr4_0672	45.8718723227119	0.121028753713266	0.309014718342633	0.3916601589801	0.695309331352514	0.913019544784582
4243	PAS_chr4_0475	45.8728240215233	-0.12026886517304	0.307721307668664	-0.390836975457474	0.695917742005968	0.913258861677152
445	PAS_chr1-1_0179	184.513561010648	0.0916130902216877	0.23611868484231	0.387995936377803	0.698019040811457	0.91351261396794
904	PAS_chr1-4_0194	819.449795154208	0.0765935806064166	0.197291032271599	0.388226366523212	0.697848522741673	0.91351261396794
1359	PAS_c121_0003	33.3553412449392	-0.139102887633155	0.358540748782348	-0.387969535138105	0.698038578675196	0.91351261396794
1366	PAS_c121_0009	32.8725826209669	0.137431115854947	0.355010814150519	0.387118111271615	0.698668770085606	0.91351261396794
3019	PAS_chr3_0364	23.8548595001412	0.166967245076554	0.429061137662799	0.389145579546229	0.697168457920516	0.91351261396794
4598	PAS_chr4_0838	113.261817183021	0.0908229229135219	0.234318853065367	0.387603992275369	0.698309114059209	0.91351261396794
4177	PAS_chr4_0410	33.1039990354463	-0.139602074396429	0.363059810708745	-0.38451536159815	0.700596512496525	0.915474589195154
3771	PAS_c131_0005	72.9875692270308	0.101775392428717	0.267666920417143	0.380231491699111	0.703773584626686	0.919065686687988
265	PAS_chr1-1_0459	30.1165568817388	0.140828897017489	0.373105681139822	0.377450422591428	0.705838901286513	0.921201440595004
426	PAS_chr1-1_0479	41.0727299331467	0.128872172431948	0.343132903614864	0.375575093715277	0.707232809739104	0.922121612530213
1188	PAS_chr1-4_0478	49.271251772176	-0.120028285919695	0.319784450115181	-0.375341220864437	0.707406713461525	0.922121612530213
3714	PAS_chr3_1091	41.3589626016464	-0.133011110111677	0.354918186434806	-0.374765552162284	0.707834835563323	0.922121612530213
3927	PAS_chr4_0163	26.6626043042568	0.150774361466242	0.403110240516673	0.374027614066544	0.70838377173238	0.922276077048901
3047	PAS_chr3_0391	34.9109361087691	0.131369191662317	0.351885444313463	0.373329428043326	0.708903276707632	0.922392059492687
2725	PAS_chr3_0065	193.901761418197	0.0814316481813802	0.21870676576002	0.3723325517544	0.709645265261599	0.922797210834713
3868	PAS_chr4_0102	558.832859186123	-0.0699216474381149	0.188379666221892	-0.371174070113037	0.710507884885713	0.923358639969729
756	PAS_chr1-4_0043	468.726401599651	-0.0817128484836858	0.221626199110253	-0.368696701074749	0.712353807948227	0.924076398567221
4322	PAS_chr4_0552	4749.1007191953	-0.0970634600811113	0.262638976835222	-0.369569898766429	0.711702982872961	0.924076398567221
4637	PAS_chr4_0879	68.2869739403248	0.112529947755313	0.304963822854908	0.368994416130635	0.712131886837445	0.924076398567221
838	PAS_chr1-4_0130	15968.7755564394	-0.0960453327453082	0.267153915896599	-0.359513100988878	0.719211278871065	0.924136391657261
872	PAS_chr1-4_0163	582.134967815354	0.078972205846564	0.217971630870997	0.362304973041663	0.717124142318831	0.924136391657261
1115	PAS_chr1-4_0403	117.68841720892	-0.0917645639791049	0.253826148856888	-0.361525258104292	0.717706826739814	0.924136391657261
1256	PAS_chr1-4_0546	302.853285904423	-0.081946878310489	0.223498488327242	-0.366655179298145	0.713876243207967	0.924136391657261
1298	PAS_chr1-4_0592	26.2328955407174	0.141739535097609	0.390174374917511	0.363272280829758	0.716401497706008	0.924136391657261
1408	PAS_FragB_0074	105.806877192894	0.0983327739029095	0.268905677122703	0.365677567521343	0.714605687019222	0.924136391657261
1554	PAS_chr2-1_0124	35.7728292222805	-0.125312118737779	0.349388148623115	-0.358661618121892	0.719848244778778	0.924136391657261
1723	PAS_chr2-1_0292	25.3180286969811	-0.143504358782895	0.396829189514531	-0.361627527850091	0.717630390739597	0.924136391657261
2047	PAS_chr2-1_0870	44.7381611736314	0.126713529852883	0.352631929234328	0.359336518754886	0.719343358135708	0.924136391657261
2601	PAS_chr2-2_0458	77.1951619258387	-0.100153653205418	0.275389527599461	-0.363679962990771	0.716097007461337	0.924136391657261
2717	PAS_chr3_0058	50.2279440345273	0.115337238199542	0.31560378911398	0.365449472337888	0.714775917504587	0.924136391657261
2739	PAS_chr3_0077	27.3360934086363	0.135276247574885	0.368453017487078	0.367146531998831	0.713509719678044	0.924136391657261
2798	PAS_chr3_0141	114.995004304615	0.093265087151404	0.260341081698401	0.358241913043327	0.720162283745975	0.924136391657261
2961	PAS_chr3_0300	46.8461304532835	0.121829944190851	0.333917901129919	0.364849993901494	0.71522338391532	0.924136391657261
3354	PAS_chr3_0716	52.0738137274152	-0.109108251800563	0.300795243756417	-0.362732636453914	0.716804617431612	0.924136391657261
3444	PAS_chr3_0818	24.7901686153589	0.149147365741036	0.405258371061829	0.368030314463959	0.712850630435203	0.924136391657261
3962	PAS_chr4_0200	30.6407156170369	-0.138816728169853	0.385672632430771	-0.359934090461477	0.71889642269963	0.924136391657261
4265	PAS_chr4_0969	67.5731173912197	-0.114718429282509	0.320127274880735	-0.35835256250892	0.720079487110319	0.924136391657261
571	PAS_chr1-1_0303	43.8875764316231	-0.114788140171727	0.322967440942664	-0.355417065685286	0.722277165802162	0.925337990104465
1412	PAS_FragB_0040	34.6633565385571	0.124099982017625	0.349320568845871	0.355261021209377	0.722394053870634	0.925337990104465
2949	PAS_chr3_0289	57.6328036152001	-0.106511203644135	0.299625894023438	-0.355480636916525	0.722229548426323	0.925337990104465
108	PAS_chr1-3_0121	59.0741092562915	0.10397692960079	0.296130791433465	0.351118264660943	0.725499625998965	0.925456259142115
129	PAS_chr1-3_0300	251.408038324869	-0.0822739129843547	0.234314767784958	-0.351125598109384	0.725494124551665	0.925456259142115
1126	PAS_chr1-4_0679	45.4229620101334	-0.107958071449093	0.306671345654065	-0.352031818358644	0.72481440030212	0.925456259142115
2627	PAS_chr2-2_0054	1761.76062881096	0.0663377717862482	0.187986199368268	0.352886392773394	0.724173612413836	0.925456259142115
4181	PAS_chr4_0414	220.996844823443	-0.0876929699496839	0.24754612018349	-0.354249017858501	0.723152271313994	0.925456259142115
4285	PAS_chr4_0518	33.1520636518175	0.122636680863672	0.349081230792837	0.351312731953931	0.725353744232876	0.925456259142115
4489	PAS_chr4_0730	33.1752290143589	0.118956578063524	0.338805972504936	0.351105316072287	0.725509339878093	0.925456259142115
192	PAS_chr1-3_0209	40.1314426787415	-0.114300151547493	0.326455799619671	-0.350124432406025	0.726245315564066	0.925843968622126
3733	PAS_chr3_1111	370.233242889631	0.0692645020626553	0.198231828308904	0.349411608890176	0.726780319263158	0.925975163008886
379	PAS_chr1-1_0111	73.8645703516311	0.106664983943197	0.306890071180369	0.347567399404418	0.728165093026147	0.927188231940008
2800	PAS_chr3_0143	24.6030739267768	-0.137777036023753	0.397318281753733	-0.346767421362077	0.728766054181268	0.927402407429013
279	PAS_chr1-1_0016	325.107722783538	0.0758639462841759	0.22132388215454	0.342773430258212	0.731768915917488	0.927917625332058
740	PAS_chr1-4_0023	39.4436813703454	-0.11664403352408	0.339994579330437	-0.343076156548704	0.731541168088748	0.927917625332058
1637	PAS_chr2-1_0210	972.906583274085	0.076933970620408	0.222974691958922	0.345034541563943	0.730068403029485	0.927917625332058
2286	PAS_chr2-2_0384	25.8183103529796	-0.12918660721586	0.375494801057423	-0.34404366412547	0.730813448958891	0.927917625332058
2941	PAS_chr3_1174	21.5772608320861	-0.148186143564151	0.43020564926477	-0.34445420188555	0.730504732610954	0.927917625332058
3450	PAS_chr3_0824	84.5145009849827	-0.0935425149798619	0.271989035450203	-0.343920168785584	0.730906323567515	0.927917625332058
1027	PAS_chr1-4_0314	366.809234771455	0.0966083438933866	0.282605361209599	0.341848942567425	0.732464575112471	0.928037705252507
1460	PAS_chr2-1_0030	33.2027804266436	-0.138396776567712	0.40526539564586	-0.341496653932549	0.732729723419152	0.928037705252507
1746	PAS_chr2-1_0316	49.1476364085915	0.102114189408298	0.299816368965058	0.340589107128434	0.73341293092822	0.92835434789083
181	PAS_chr1-3_0198	39.2445512934962	-0.120704393625892	0.356086482448229	-0.338974938885643	0.734628609533582	0.929344220915269
2782	PAS_chr3_0124	21.8274997140641	-0.138466029092828	0.410406941690936	-0.337387151694677	0.735825068924319	0.930308626964493
683	PAS_chr1-1_0421	44.6349510339895	-0.11273872313175	0.336040963683924	-0.335491012452252	0.737254723311488	0.930318563116617
1565	PAS_chr2-1_0137	58.3274737979535	-0.0995923783432208	0.295881115729375	-0.336595926704265	0.736421527229957	0.930318563116617
1942	PAS_chr2-1_0517	132.416996439735	-0.0947910185109601	0.28291108785868	-0.33505586235033	0.737582947059665	0.930318563116617
2139	PAS_chr2-1_0722	151.509382100054	-0.076982694346629	0.230143710778167	-0.334498362289951	0.738003526504082	0.930318563116617
3340	PAS_chr3_1210	24.7874999521447	-0.127201008154267	0.379586369133208	-0.335104256890817	0.737546441800695	0.930318563116617
4639	PAS_chr4_0881	28.3124749513371	-0.130014957463668	0.390007345551605	-0.333365406950942	0.738858472402264	0.930848739775457
1009	PAS_chr1-4_0668	571.92875272772	-0.0851777395390837	0.256454210818662	-0.332136248678376	0.739786379778326	0.930923201329977
2886	PAS_chr3_0230	18978.1608597122	-0.0955490669804178	0.28748994673688	-0.332356202590512	0.739620305872939	0.930923201329977
704	PAS_chr1-1_0443	184.522288163015	-0.0711603255799804	0.218864673814855	-0.325133902788612	0.745079730957321	0.930943083963119
886	PAS_chr1-4_0659	537.064591384898	-0.0782237850019681	0.242475245362112	-0.322605241145952	0.746994223940493	0.930943083963119
992	PAS_chr1-4_0284	151.812523163981	0.0781466151087232	0.241758650375846	0.323242270699451	0.746511770313908	0.930943083963119
1040	PAS_chr1-4_0670	47.6827592147571	0.0984845408430495	0.302085772982448	0.326015157452555	0.744412887129284	0.930943083963119
1645	PAS_chr2-1_0216	29.6049354286812	0.123058143899183	0.373667806976395	0.329324982248087	0.741910063218538	0.930943083963119
2034	PAS_chr2-1_0612	33.3039940666275	0.112050644877719	0.339891746436909	0.329665683419348	0.741652586109727	0.930943083963119
2259	PAS_chr2-2_0414	104.796493499863	0.0827717665803358	0.251459153049423	0.329165852889306	0.742030331487538	0.930943083963119
2344	PAS_chr2-2_0323	526.625700296198	-0.158303436392871	0.492230304563848	-0.321604409409817	0.74775240295157	0.930943083963119
2347	PAS_chr2-2_0320	38.5301835109849	0.104577119309492	0.324709742503147	0.322063386528904	0.747404674984633	0.930943083963119
2379	PAS_chr2-2_0290	38.2179772460969	0.116408543716189	0.353683176858802	0.329132261110235	0.742055720600612	0.930943083963119
2425	PAS_chr2-2_0247	36.2590840963875	0.11782516548422	0.361368170481454	0.326052970651068	0.744384278232365	0.930943083963119
2925	PAS_chr3_0266	30.2187036608985	-0.118307859421071	0.364936905019337	-0.324187161654157	0.745796341191182	0.930943083963119
2948	PAS_chr3_0288	52.4726595348705	-0.105001724478307	0.322668321373332	-0.325416898787589	0.74486556753895	0.930943083963119
3027	PAS_chr3_0371	56.45086653336	0.0957656468888264	0.296803917367204	0.322656276703874	0.746955568561087	0.930943083963119
3155	PAS_chr3_0507	150.757036904984	-0.0725444556476511	0.222471409839392	-0.326084397541341	0.744360501388541	0.930943083963119
3257	PAS_chr3_0615	73.8482920387022	-0.0837202257590037	0.258120200395286	-0.324345888585219	0.745676181746343	0.930943083963119
3875	PAS_chr4_0109	23.5023134557135	0.141789733987445	0.441432376744177	0.321203748200862	0.748055991873304	0.930943083963119
3995	PAS_chr4_0228	167.344533606274	-0.0777343371501169	0.241874910809615	-0.321382390963663	0.747920625889559	0.930943083963119
4029	PAS_chr4_0260	86.2673095215236	0.0947747384674422	0.289373910744556	0.327516527746361	0.743277244338844	0.930943083963119
2561	PAS_chr2-2_0119	26.0438465346248	0.136389164732083	0.426205468893359	0.320008011831047	0.748962257104071	0.931529957616962	KpMET3
3715	PAS_chr3_1092	23.5504681033026	-0.131125357410207	0.410752397420896	-0.319232117045547	0.749550504180314	0.931720841333187
2515	PAS_chr2-2_0165	529.645479421488	-0.0626262489932308	0.196649066810167	-0.318467054072961	0.750130681768896	0.931901478858403
3717	PAS_chr3_1095	32.4531641724511	-0.11091692300059	0.349202263538399	-0.317629450269566	0.750766032053499	0.932150409438383
3694	PAS_chr3_1074	21.7580515197468	0.139173759170507	0.440625090673763	0.315855274963337	0.752112360698987	0.93274119732519
3867	PAS_chr4_0101	20.7952158688144	0.133870932842071	0.423084343132939	0.316416655484712	0.751686276648641	0.93274119732519
1269	PAS_chr1-4_0560	88.3688472981032	-0.08152588260036	0.263099625177152	-0.309866965965711	0.756662124533595	0.93459765583602
1737	PAS_chr2-1_0306	25.448598786015	-0.126170937317025	0.406438048748773	-0.310430919805478	0.756233284119006	0.93459765583602
1884	PAS_chr2-1_0459	23.201780589891	0.126456880348912	0.404323183179183	0.312761883586751	0.754461576024748	0.93459765583602
2334	PAS_chr2-2_0333	59.1670815365895	0.0972118512139106	0.311705433100095	0.311870891203536	0.755138645394079	0.93459765583602
2576	PAS_chr2-2_0102	25.5837800594122	-0.125544143887288	0.404815606523873	-0.310126738851123	0.756464579346776	0.93459765583602
3726	PAS_chr3_1104	30.8603172195278	0.110449971991469	0.353776895837648	0.312202332291806	0.75488675972236	0.93459765583602
4249	PAS_chr4_0480	21.4372804194908	-0.133424861044607	0.428758753138228	-0.311188658116075	0.755657204802986	0.93459765583602
16	PAS_chr1-3_0025	22.0026120553728	0.133472949139112	0.432438154123123	0.308652110981655	0.757586176078522	0.935199985792784
3014	PAS_chr3_0360	22.9539342502891	-0.135304504777547	0.439327216993884	-0.307981157423787	0.758096670126422	0.935291401313139
3102	PAS_chr3_0452	130.671578147921	-0.0759932722051262	0.247410476095289	-0.307154625804357	0.758725680526683	0.935528845436526
543	PAS_chr1-1_0277	45.497057545325	0.0957695041041903	0.314282230347251	0.304724527372656	0.760575967366224	0.937271016714099
2718	PAS_chr3_0059	23.5376770873592	0.131948964324954	0.436112933511997	0.302556870447237	0.762227587092888	0.938766505252907
1283	PAS_chr1-4_0575	33.1220709563091	-0.103341223517106	0.344071325413455	-0.300348258876051	0.763911526119977	0.940300057711149
15	PAS_chr1-3_0024	35.9912464751007	-0.111406357268326	0.375332659992637	-0.296820312067998	0.766603697165373	0.941201152906458
466	PAS_chr1-1_0201	61.5849589701729	-0.084588087478791	0.286388627069316	-0.295361196233249	0.767717972599388	0.941201152906458
1017	PAS_chr1-4_0304	22.6901856226906	-0.122262118530676	0.412797476367312	-0.296179423398136	0.767093062005608	0.941201152906458
1984	PAS_chr2-1_0861	73.5874764698075	0.0798563951824175	0.269970605873124	0.295796629133569	0.767385397431722	0.941201152906458
2113	PAS_chr2-1_0688	29.1248803516649	0.109479150646579	0.370030602655382	0.295865125373265	0.767333085235459	0.941201152906458
3424	PAS_chr3_0795	62.9144385824886	-0.0855212424273188	0.287375891175941	-0.297593657134446	0.766013316232912	0.941201152906458
3608	PAS_chr3_0984	30.312661019818	-0.106027176023625	0.356769335232951	-0.2971869091675	0.766323815611055	0.941201152906458
2028	PAS_chr2-1_0608	30.1056021201257	-0.104095823161086	0.356519989125361	-0.291977522540771	0.77030380993294	0.942761097751914
2657	PAS_chr2-2_0028	23.0358710868535	-0.114843285133771	0.392515152578281	-0.292583061773308	0.769840862226198	0.942761097751914
2816	PAS_chr3_0166	42.3438891719394	0.0993965233416897	0.340508966068228	0.291905744772	0.770358691003438	0.942761097751914
3288	PAS_chr3_0647	139.49485125099	-0.0680569376363553	0.233556505304984	-0.29139388580714	0.770750090182619	0.942761097751914
3328	PAS_chr3_0691	105.949290437208	-0.0707093877299859	0.243371909059047	-0.290540465427464	0.771402798221537	0.943021218818456
4657	PAS_chr4_0901	28.4090587244741	0.116599361256555	0.402979037770763	0.289343490176487	0.772318534526818	0.943602405639093
283	PAS_chr1-1_0020	77.9532060700447	-0.0795860671968795	0.280186610039968	-0.28404664728813	0.776374632839529	0.94425132700063
515	PAS_chr1-1_0249	103.290080942646	-0.0710899266900363	0.25023001354467	-0.284098320912833	0.776335033693623	0.94425132700063
833	PAS_chr1-4_0124	27.7858522446685	0.107931451014634	0.376869073627447	0.286389779813371	0.774579601569062	0.94425132700063
900	PAS_chr1-4_0190	41.0696408003176	0.0955097215354083	0.334213790288361	0.285774328620618	0.775050971314196	0.94425132700063
2521	PAS_chr2-2_0160	32.6895557792985	-0.0993271444105525	0.34912507924439	-0.284503034343811	0.776024909003672	0.94425132700063
3464	PAS_chr3_0842	200.309336159469	-0.070487446383946	0.247585871041694	-0.284698985799863	0.775874767721228	0.94425132700063
3584	PAS_chr3_0962	38.4352017655207	0.10093725265816	0.352526997951491	0.286324886447561	0.774629299026958	0.94425132700063
4585	PAS_chr4_0826	25.2418891447486	0.112395646404276	0.392105356319272	0.286646546885623	0.774382970022369	0.94425132700063
2585	PAS_chr2-2_0093	22.5990423495062	-0.11801271026896	0.422682155520578	-0.27919965091409	0.780091611520782	0.94567267036462
2622	PAS_chr2-2_0059	27.1704807597122	-0.10718088295585	0.384064294920429	-0.27907015667274	0.780190985163158	0.94567267036462
2733	PAS_chr3_1150	21.1333256938135	-0.11775549826691	0.417791256458244	-0.281852471650944	0.778056634667398	0.94567267036462
2893	PAS_chr3_0234	59.7443172535952	-0.0899122497704815	0.320218934260318	-0.280783676887103	0.778876324140945	0.94567267036462
3190	PAS_chr3_0541	21.0099715571472	-0.116784844588159	0.417471534738769	-0.279743251623697	0.779674492552133	0.94567267036462
4602	PAS_chr4_0843	37.6611581348115	0.0995704226530284	0.35546062211838	0.280116604926968	0.77938804558165	0.94567267036462
161	PAS_chr1-3_0173	41.2483385077899	0.0886517775879476	0.318863771623034	0.278023988541267	0.780993944231091	0.945871237019022
795	PAS_chr1-4_0085	24.2933586822053	-0.109413808279107	0.393990602263293	-0.277706644906188	0.78123755927376	0.945871237019022
2918	PAS_chr3_0259	50.3408895450787	-0.0868487184482948	0.314795029240585	-0.275889738976532	0.782632755286808	0.9459571317426
3012	PAS_chr3_0358	39.9229433585976	-0.0962862114057786	0.348641474517934	-0.276175436496514	0.782413322652947	0.9459571317426
4205	PAS_chr4_0438	29.3137581981814	0.113386924347326	0.410422620493913	0.276268701298367	0.782341693503215	0.9459571317426
1028	PAS_chr1-4_0315	24.7700588719587	-0.108662774792537	0.397190370674108	-0.273578572934977	0.784408502306286	0.947569008141134
3408	PAS_chr3_1219	75.9722332736004	0.0805641692858447	0.29636718296521	0.271839035887121	0.78574578872223	0.948253527396038
4655	PAS_chr4_0899	22.8973416876339	0.111592921045801	0.410735702973688	0.271690335750894	0.785860132830314	0.948253527396038
46	PAS_chr1-3_0057	65.191042117079	0.0826778009848987	0.308182913019396	0.26827509732733	0.78848757330905	0.94928588179848
746	PAS_chr1-4_0030	21.5960654044589	0.122870827810091	0.457637396827178	0.268489482419838	0.788322569589828	0.94928588179848
2077	PAS_chr2-1_0651	253.244020436813	-0.0579323212494643	0.214700969262194	-0.269827944645732	0.787292623218783	0.94928588179848
2869	PAS_chr3_0216	40.5586658430402	0.087851306230942	0.326745840607094	0.268867404915436	0.788031720737251	0.94928588179848
1881	PAS_chr2-1_0456	58.0332989552292	-0.0811908666668636	0.304155588972581	-0.266938598567666	0.789516437219858	0.949863645244844
2294	PAS_chr2-2_0376	24.0489141813431	-0.108390555832083	0.411156860492809	-0.263623366766073	0.792070151214436	0.949863645244844
2883	PAS_chr3_0227	162.423263817652	0.0767165753795016	0.290395953268043	0.264179216397999	0.791641825251643	0.949863645244844
3031	PAS_chr3_0376	118.567187170288	-0.0623428954728415	0.235293359148723	-0.264958159883451	0.79104169373587	0.949863645244844
4040	PAS_chr4_0271	173.763817714516	-0.0613148025495327	0.23252548933613	-0.263690672040252	0.792018283852029	0.949863645244844
4271	PAS_chr4_0503	42.5471592939924	0.088278008243587	0.332373818730038	0.265598561826822	0.790548393324162	0.949863645244844
4518	PAS_chr4_0760	39.0340069004482	-0.0861029493648665	0.32532636798797	-0.264666371488371	0.791266485558512	0.949863645244844
1659	PAS_chr2-1_0230	27.1186815154284	-0.0997574198933846	0.379840867567847	-0.262629507277981	0.792836154672914	0.949923676476266
3049	PAS_chr3_0393	298.354141218451	0.0573552154819847	0.219052464295807	0.261833235550971	0.793450014415547	0.949923676476266
4517	PAS_chr4_0759	53.637069366581	-0.0812520010126797	0.310145297721814	-0.261980438231757	0.793336523650441	0.949923676476266
777	PAS_chr1-4_0066	34.0249186711061	-0.0959856631256458	0.368519433159953	-0.260462962027796	0.794506681591895	0.950230134519226
4159	PAS_chr4_0390	45.8489884194734	-0.0851951098768443	0.327231375039141	-0.260351287729222	0.794592814306324	0.950230134519226
878	PAS_chr1-4_0166	63.133239283795	-0.0730730641791177	0.281687678605291	-0.259411645340405	0.795317645499088	0.950566488736501
971	PAS_chr1-4_0265	33.1998044984903	-0.0950986095524168	0.374414658917276	-0.253992751852774	0.799501157712265	0.951079782756451
1634	PAS_chr2-1_0207	126.523309302386	-0.0593536460523383	0.233070534846539	-0.254659586598617	0.798986032507218	0.951079782756451
1719	PAS_chr2-1_0288	108.3670842523	-0.0619402877939788	0.242132786811386	-0.255811237336595	0.79809659641792	0.951079782756451
1880	PAS_chr2-1_0455	78.1452600047223	-0.0707344171696797	0.277756014798789	-0.254663853889612	0.798982736336026	0.951079782756451
1895	PAS_chr2-1_0470	127.729910278376	0.0643177436976165	0.253537057826284	0.253681825643355	0.799741375887599	0.951079782756451
2018	PAS_chr2-1_0596	86.4120403495971	-0.0648288980371252	0.251249272886566	-0.258026211548059	0.796386678100656	0.951079782756451
3644	PAS_chr3_1247	46.869493546349	0.0832349447561782	0.325106550780937	0.256023585363752	0.797932625619908	0.951079782756451
4108	PAS_chr4_0337	30.1571275412464	0.102165958666422	0.400111888542377	0.255343471643937	0.798457826918597	0.951079782756451
4120	PAS_chr4_0348	260.579249223258	-0.0763273535413779	0.299206130395433	-0.255099564439081	0.798646200566342	0.951079782756451
3021	PAS_chr3_0365	1584.72324350739	-0.0731178414599543	0.289957472227016	-0.252167467519886	0.800911622829268	0.951745421421529
3116	PAS_chr3_0465	46.999035925277	-0.085272376167551	0.339414596645366	-0.251233674127006	0.801633451080663	0.951745421421529
3599	PAS_chr3_0974	33.1572066085704	-0.0908241319700852	0.360941011010867	-0.251631510965516	0.801325899924591	0.951745421421529
1867	PAS_chr2-1_0440	21.7323782069538	-0.106767429466685	0.426130304114884	-0.250551130571322	0.802161168776245	0.951844620535711
2153	PAS_chr2-1_0736	139.99054099217	-0.0554616530442421	0.222671091591615	-0.249074330429746	0.803303285187829	0.952145431503051
2845	PAS_chr3_0192	31.2403241570309	0.105368469321182	0.42284209881613	0.249191056463375	0.803212997175894	0.952145431503051
645	PAS_chr1-1_0382	33.233614851191	-0.0964877677090123	0.388936683947845	-0.248080913144081	0.804071803195379	0.952529504835653
463	PAS_chr1-1_0199	69.9342841578315	0.0670786751624397	0.272074987044677	0.246544806970532	0.80526052365595	0.953410664195968
876	PAS_chr1-4_0657	61.0141134953263	0.073164740535909	0.299282749012872	0.244466948987969	0.806869196401328	0.954260865280379
3349	PAS_chr3_0710	470.84429677318	0.0588955526655248	0.240674127084746	0.244710777094817	0.806680382801149	0.954260865280379
1275	PAS_chr1-4_0567	75.1776033252777	0.0624536289001658	0.256457337049105	0.243524438094776	0.807599155964967	0.954597347618822
599	PAS_chr1-1_0332	23.6192992457974	0.0976870796384692	0.405302964698443	0.24102236634551	0.80953778160589	0.95467415594444
685	PAS_chr1-1_0423	28.9538173006838	-0.088685071950026	0.372001100877715	-0.238400025539652	0.811570847618799	0.95467415594444
830	PAS_chr1-4_0121	37.4787776194385	0.0804808680664465	0.335807986276042	0.239663353331595	0.810591246826916	0.95467415594444
1459	PAS_chr2-1_0029	55.9271018812262	-0.0799986786339079	0.334394475648082	-0.239234450505991	0.81092379047747	0.95467415594444
1692	PAS_chr2-1_0261	148.326641353256	-0.0631858719964533	0.261218582197578	-0.241888886559615	0.808866261709389	0.95467415594444
2121	PAS_chr2-1_0702	45.4635328307281	0.0804026090485583	0.339081254927464	0.237119002835347	0.812564470575202	0.95467415594444
2352	PAS_chr2-2_0314	42.6585234494964	0.0770141809820682	0.324722740380732	0.237169041169616	0.812525652755932	0.95467415594444
2899	PAS_chr3_0240	29.8056453378788	0.0890473831764295	0.373945939936334	0.238129027932728	0.811781021173935	0.95467415594444
3772	PAS_c131_0006	53.308964028523	-0.0698860690438708	0.291760637822297	-0.239532205459588	0.810692926822075	0.95467415594444
4195	PAS_chr4_0429	23.937399378836	0.096446618014957	0.406149160222366	0.237466003775935	0.812295290045907	0.95467415594444
4578	PAS_chr4_0817	36.1769165197305	0.0814837788317627	0.343596172669137	0.237149844245287	0.812540544938594	0.95467415594444
3622	PAS_chr3_1000	54.6546131020601	0.0766842826351997	0.326049557672321	0.235192107551537	0.814059631472328	0.955906734380931
475	PAS_chr1-1_0208	73.5101653705919	-0.0638717120073235	0.272488009570464	-0.234401917750464	0.814672969965896	0.956103052922735
50	PAS_chr1-3_0061	32.0591701818425	-0.0789735382621813	0.344394086657481	-0.229311539662773	0.818626785073084	0.95730015943881
631	PAS_chr1-1_0367	35.4198079668476	-0.0797226622691351	0.346150709662541	-0.230312000073193	0.817849336524418	0.95730015943881
989	PAS_chr1-4_0281	22.9723015081024	-0.0947737125290758	0.41374522282351	-0.229062977168206	0.818819968386065	0.95730015943881
1252	PAS_chr1-4_0543	29.796677954145	-0.0836134298456568	0.362175929068065	-0.230864127444381	0.817420360095866	0.95730015943881
2299	PAS_chr2-2_0370	111.885397907986	-0.0553943817271765	0.239024822582652	-0.231751586001164	0.816730962078854	0.95730015943881
2324	PAS_chr2-2_0344	24.7124069238471	0.102145345887383	0.44389506737387	0.230111468666876	0.818005153299603	0.95730015943881
4047	PAS_chr4_0278	138.10894373933	-0.0646118232381105	0.277955668187701	-0.232453699035483	0.816185645110888	0.95730015943881
4026	PAS_chr4_0259	40.0146406495978	0.0789802807292213	0.347335676092889	0.227388909822495	0.820121343125637	0.957776587639368
4574	PAS_chr4_0813	21.2748364079718	0.0947913101245219	0.416434061448421	0.22762621720909	0.819936836552423	0.957776587639368
859	PAS_chr1-4_0150	270.43997067129	-0.0487357375103352	0.220919626361077	-0.220603928736871	0.825400841736349	0.96103380432064
890	PAS_chr1-4_0179	50.9217828820404	-0.0681015642591501	0.31251160564225	-0.21791691261895	0.82749384943772	0.96103380432064
1247	PAS_chr1-4_0688	30.582579438777	-0.0778132208718548	0.357814038932851	-0.217468328252089	0.827843386770491	0.96103380432064
1606	PAS_chr2-1_0816	71.0924115345484	0.0622906167624368	0.289257726784424	0.215346422911152	0.829497238291972	0.96103380432064
1668	PAS_chr2-1_0819	37.0592649629734	-0.0750344176549544	0.350409506824806	-0.214133510060471	0.830442944560585	0.96103380432064
1688	PAS_chr2-1_0257	22.0188898422718	-0.0910085688255068	0.411256875914127	-0.221293731863367	0.824863730257465	0.96103380432064
2029	PAS_chr2-1_0609	57.8997892462115	-0.0621085353504238	0.279132748596316	-0.222505369444291	0.823920493820043	0.96103380432064
2663	PAS_chr2-2_0021	57.1391522594101	0.0686150250494107	0.31127555947174	0.220431778087094	0.825534898664758	0.96103380432064
2815	PAS_chr3_0165	55.1512769942023	-0.0661556872919556	0.304272014807329	-0.217422845587185	0.82787882880807	0.96103380432064
3073	PAS_chr3_0418	36.2084069207826	-0.0832459703535241	0.382145082522204	-0.217838653853899	0.827554826277691	0.96103380432064
3594	PAS_chr3_0969	51.6491489085421	-0.0668822586902403	0.312042907997196	-0.214336736955552	0.83028447169775	0.96103380432064
3727	PAS_chr3_1105	32.8970650820069	-0.0740616660447051	0.342658749931469	-0.216138260177268	0.828879977172804	0.96103380432064
3922	PAS_chr4_0158	1882.91137467714	0.0618427822109826	0.281960303596237	0.219331520863804	0.826391809525688	0.96103380432064
3933	PAS_chr4_0170	60.2432381428901	-0.0642260406160855	0.299281974048292	-0.214600430982596	0.830078857887795	0.96103380432064
4121	PAS_chr4_0349	21.1011020425559	-0.0898208061842995	0.417091909823133	-0.215350152014188	0.82949433109628	0.96103380432064
4312	PAS_chr4_0542	42.0368911778059	0.0690003856110537	0.322406702278433	0.214016598052805	0.830534113673273	0.96103380432064
4371	PAS_chr4_0603	59.8276978555197	0.0634347869968821	0.295016809859531	0.215020923814768	0.829751005240933	0.96103380432064
4339	PAS_chr4_0571	34.2744326263715	-0.0778052226229923	0.365580377684899	-0.212826583077865	0.831462228418845	0.961588535079106
4116	PAS_chr4_0345	42.3808054650742	-0.0722358105266257	0.34060309653289	-0.212082072247545	0.832043005849537	0.961741187451757
573	PAS_chr1-1_0305	29.8711166464659	0.0754601925627084	0.357767792847166	0.210919468077843	0.832950112516599	0.961816652827189
1766	PAS_chr2-1_0336	44.8900069312949	0.0717720335966759	0.340397132269189	0.210847938460063	0.833005929840067	0.961816652827189
1282	PAS_chr1-4_0703	35.4920287505533	0.0700433248955695	0.33337841652553	0.210101558539875	0.833588409089929	0.961970899665976
3390	PAS_chr3_0763	169.350863576187	0.0494179106306393	0.235916682183525	0.209471878687222	0.834079885979234	0.962020019189182
2302	PAS_chr2-2_0367	23.088414431093	0.0840378780943729	0.403319601265573	0.208365469544925	0.834943615906536	0.962498208116034
1059	PAS_chr1-4_0347	22.28063969843	-0.0955990551162442	0.464863413679871	-0.205649772176045	0.837064495815284	0.963388407374948
2765	PAS_chr3_1154	42.2022923932412	0.0678995536647821	0.329553894481486	0.206034748190775	0.836763768430385	0.963388407374948
4051	PAS_chr4_0939	25.4641809105929	-0.0836601947742832	0.405520884616503	-0.206303048617089	0.836554197304763	0.963388407374948
1680	PAS_chr2-1_0249	28.4397746685456	0.083652872531536	0.409996300123402	0.20403323763253	0.838327525326746	0.963894067511634
4599	PAS_chr4_0840	60.4196040044981	-0.0611331173232258	0.299766025689477	-0.203936110446861	0.838403425964389	0.963894067511634
699	PAS_chr1-1_0438	26.4406894114529	-0.0738459202074557	0.377834099623858	-0.195445356258133	0.845044312027001	0.964307792578108
793	PAS_chr1-4_0083	488.093981161148	-0.0453806192764056	0.2248614386983	-0.201815925127534	0.84006063126228	0.964307792578108
842	PAS_chr1-4_0135	40.0226584564252	-0.0674204478316895	0.336714563549795	-0.200230269581788	0.841300494795052	0.964307792578108
868	PAS_chr1-4_0159	35.1447521996578	0.0666537465000006	0.332115804614436	0.200694292695228	0.840937622691598	0.964307792578108
1197	PAS_chr1-4_0684	59.18530810359	-0.0597154877618155	0.305199317178788	-0.195660620455562	0.844875808908194	0.964307792578108
1409	PAS_FragB_0075	224.345848331594	-0.0516238956819362	0.263962310136826	-0.195572980306077	0.844944410442547	0.964307792578108
1673	PAS_chr2-1_0243	50.1825286492863	-0.0612829927259418	0.312769805629945	-0.195936409534522	0.844659938885027	0.964307792578108
1913	PAS_chr2-1_0489	504.515670277879	0.0554897907042412	0.281325835729307	0.197243849148763	0.843636717909337	0.964307792578108
1926	PAS_chr2-1_0502	143.491155589588	-0.0442718974082928	0.227214042102399	-0.194846660878207	0.845512992185845	0.964307792578108
2054	PAS_chr2-1_0629	29.2413218756497	-0.071340540791066	0.364577045674375	-0.195680286615697	0.844860415112007	0.964307792578108
3078	PAS_chr3_0423	31.0487720586738	0.0763319330957009	0.382585357250174	0.199516086146985	0.841859061375381	0.964307792578108
3532	PAS_chr3_0910	31.9790601710005	-0.0730301160361043	0.368195438659683	-0.198346063986971	0.842774313683694	0.964307792578108
4351	PAS_chr4_0584	29.3050812573872	-0.0710033777693593	0.357999818216142	-0.19833355816536	0.842784097538632	0.964307792578108
4545	PAS_chr4_0786	1771.78501105813	0.0402126392588082	0.199439425529531	0.201628334779043	0.840207292192459	0.964307792578108	SOD1
4618	PAS_chr4_0860	96.7974846580699	0.0587952242373426	0.301706706251474	0.194875430406696	0.845490469117985	0.964307792578108
48	PAS_chr1-3_0059	107.769875497866	0.0465725542383158	0.243844371972408	0.190992943005409	0.848531122052659	0.965329061547667
471	PAS_chr1-1_0205	23.6233208798047	0.0723708022308384	0.389186703079841	0.185953943590903	0.852480878985576	0.965329061547667
499	PAS_chr1-1_0233	46.7120797608206	0.057763141776281	0.314773554129275	0.183506971975664	0.8544002488181	0.965329061547667
578	PAS_chr1-1_0310	25.6592415337734	0.0724511991078898	0.397087592314732	0.182456466810136	0.855224515306255	0.965329061547667
630	PAS_chr1-1_0366	24.3926750281616	0.0723595014944969	0.400005405067724	0.180896309344235	0.856448965779571	0.965329061547667
959	PAS_chr1-4_0252	80.9015125371605	0.0482309823338853	0.266856348326214	0.180737623955366	0.856573525441612	0.965329061547667
1099	PAS_chr1-4_0385	22.6846443494242	0.0724379653859154	0.40177010963585	0.180297049602746	0.856919371793812	0.965329061547667
1514	PAS_chr2-1_0089	193.633067903757	-0.0436345650508694	0.228232694822616	-0.191184549982124	0.84838100768282	0.965329061547667
1804	PAS_chr2-1_0376	212.46998528553	0.0422118311602194	0.229241676286226	0.184136810740795	0.853906129389741	0.965329061547667
2010	PAS_chr2-1_0588	43.6749454879041	-0.0614643112777726	0.329297482132003	-0.186652843136936	0.851932831918844	0.965329061547667
2151	PAS_chr2-1_0733	24.7937229316085	-0.0775161340680759	0.411424805421885	-0.188408994903914	0.850556049054659	0.965329061547667
2280	PAS_chr2-2_0393	45.612596008241	-0.0589897227179268	0.319916345750801	-0.18439108692457	0.853706661542361	0.965329061547667
2340	PAS_chr2-2_0327	118.368991944826	0.0487644470826855	0.261958478019568	0.186153345565868	0.85232450923036	0.965329061547667
2598	PAS_chr2-2_0080	23.2376141910323	-0.0798975111701418	0.422260833131596	-0.189213644508777	0.849925374055337	0.965329061547667
2910	PAS_chr3_0251	56.8354354139053	-0.07325670762936	0.38805802770181	-0.188777714671197	0.850267038897775	0.965329061547667
3056	PAS_chr3_1188	50.5352742486984	0.0557113044718516	0.305329198679708	0.1824630749786	0.855219329790054	0.965329061547667
3188	PAS_chr3_0538	48.1364982232579	0.0536333326962838	0.298146976263649	0.179888903682378	0.857239786674736	0.965329061547667
3521	PAS_chr3_0898	114.200438042945	0.0420126595805661	0.231559613570634	0.181433450042231	0.856027365210698	0.965329061547667
3627	PAS_chr3_1006	27.0717308883584	-0.0801033286902935	0.42759198805431	-0.187335897135938	0.851397279325118	0.965329061547667
3698	PAS_chr3_1251	21.8906476517025	-0.0731612180496587	0.407944497575186	-0.179341107637258	0.857669870829098	0.965329061547667
3989	PAS_chr4_0224	32.2710105029225	0.0655720597739102	0.365055269836145	0.179622279671082	0.857449112513837	0.965329061547667
4024	PAS_chr4_0258	24.5031063705956	-0.0810132801275751	0.430154450776588	-0.188335329278393	0.850613792098603	0.965329061547667
4141	PAS_chr4_0374	342.582848387544	-0.0516600534480493	0.283281888367911	-0.18236271208753	0.855298086536498	0.965329061547667
4255	PAS_chr4_0487	68.1773410705263	0.0562303085950093	0.303616019479094	0.185202047940297	0.853070562855837	0.965329061547667
4556	PAS_chr4_0797	43.1645127497301	-0.0577922856458411	0.322025177929017	-0.179465115173634	0.857572506661919	0.965329061547667
3231	PAS_chr3_0586	48.4772322931483	0.0569504845914537	0.319273179962818	0.178375410668964	0.858428159055204	0.965675351630079
1709	PAS_chr2-1_0277	20.6667742649694	0.0756579355010713	0.430681908678727	0.175670103564785	0.860553123906335	0.967006590526115
3212	PAS_chr3_0565	59.2822908190941	-0.0583767062357602	0.332460051841385	-0.175590137559178	0.860615951055521	0.967006590526115
4527	PAS_chr4_0990	30.9001884748231	-0.0608500016664037	0.347425343813133	-0.175145546374224	0.860965270519751	0.967006590526115
1906	PAS_chr2-1_0481	198.571893820044	-0.0449115966145471	0.262005908248471	-0.171414442196302	0.863897899614382	0.968324383335004
2579	PAS_chr2-2_0099	34.6105748747032	0.0684001876238213	0.397458625957823	0.17209385620701	0.863363742742975	0.968324383335004
2983	PAS_chr3_0331	31.7639362148539	-0.059969948839188	0.348773657460327	-0.17194517864644	0.863480628056446	0.968324383335004
3720	PAS_chr3_1255	122.369046502279	0.0433085971067366	0.252744460064712	0.171353299279628	0.863945973372155	0.968324383335004
91	PAS_chr1-3_0102	5522.04029638167	-0.100401974669549	0.596079101938129	-0.16843733380871	0.866239239519957	0.968980837705539
882	PAS_chr1-4_0170	23.913163656924	-0.0656444593984553	0.391226035005038	-0.167791643512707	0.866747196805618	0.968980837705539
1677	PAS_chr2-1_0246	53.7075033710582	-0.0489362706943245	0.292752138823994	-0.167159395968566	0.86724463216016	0.968980837705539
2831	PAS_chr3_0177	30.630104486748	-0.0658046846843632	0.393125152441775	-0.167388640171299	0.867064262904576	0.968980837705539
3503	PAS_chr3_1234	178.59403898941	0.0377768457973801	0.224818341946931	0.168032756892663	0.866557509174854	0.968980837705539
3631	PAS_chr3_1011	55.2361060686975	-0.0488884474513155	0.288402117268183	-0.169514870120924	0.865391676953989	0.968980837705539
3683	PAS_chr3_1248	22.3454697362365	-0.0703170354214543	0.423676372213666	-0.165968744147933	0.868181547550582	0.969522176342312
31	PAS_chr1-3_0043	40.8983683790717	0.0559595453085855	0.341113374774893	0.164049695634228	0.869692022253459	0.969693030015173
928	PAS_chr1-4_0217	22.6440273528462	-0.0721755239645695	0.439154030039668	-0.164351273192346	0.869454620238899	0.969693030015173
3033	PAS_chr3_0377	1463.24751488565	-0.0392793917868875	0.23844859817008	-0.16472896921319	0.86915731432844	0.969693030015173
821	PAS_chr1-4_0112	45.4430415252677	-0.0507857325529043	0.310990392078667	-0.1633032204418	0.870279698395831	0.969843678451516
150	PAS_chr1-3_0163	21.3605216789833	0.0661258783790917	0.429104043048219	0.154102203067942	0.87752915123424	0.969853002111901
320	PAS_chr1-1_0053	36.2438536185306	0.056805793914021	0.355223042954794	0.159915847354672	0.872947364792411	0.969853002111901
932	PAS_chr1-4_0222	29.297834801167	0.0554894741239257	0.357674758111104	0.15513947480378	0.876711362513262	0.969853002111901
1214	PAS_chr1-4_0504	29.9058763424211	-0.0602513348475535	0.372314466039017	-0.161829153426553	0.871440394522436	0.969853002111901
1541	PAS_chr2-1_0113	30.4745758834269	-0.0593489746974609	0.373331429465352	-0.158971278636933	0.873691502364313	0.969853002111901
2065	PAS_chr2-1_0640	35.2361936055904	0.0539583898367014	0.345405729172617	0.156217414129039	0.875861650761484	0.969853002111901
2149	PAS_chr2-1_0731	40.7212041704442	0.0502518256317563	0.324889913375279	0.154673394165089	0.877078805915896	0.969853002111901
2331	PAS_chr2-2_0337	810.968250968228	0.027608628005119	0.179055437817916	0.154190391208306	0.87745961829421	0.969853002111901
2560	PAS_chr2-2_0120	38.1383791928367	0.0540568898983065	0.345047330099468	0.156665144699782	0.875508758306942	0.969853002111901
2589	PAS_chr2-2_0088	155.619920611259	-0.0347114304241443	0.223109009742281	-0.155580585760478	0.876363628896969	0.969853002111901
2711	PAS_chr3_0052	26.7017010273741	-0.0602219047183873	0.383751564635367	-0.156929405032156	0.875300485107535	0.969853002111901
2848	PAS_chr3_0195	31.891428057114	0.055401108692801	0.347604620174077	0.159379667235311	0.873369757336395	0.969853002111901
2923	PAS_chr3_0264	22.0146777443353	0.0658241992284008	0.411275816323302	0.160048796004715	0.872842635962344	0.969853002111901
3024	PAS_chr3_0368	22.3625217423867	-0.0649807393656068	0.410852470395957	-0.158160760973354	0.874330122725405	0.969853002111901
3490	PAS_chr3_0867	87.7442380184689	-0.0455451997305826	0.28288548988359	-0.161002247762248	0.872091630280467	0.969853002111901	FGH1
3554	PAS_chr3_1241	38.2803646445036	-0.0515483205224633	0.325000791509648	-0.158609830711545	0.873976283061827	0.969853002111901
661	PAS_chr1-1_0399	58.89483340427	0.0442826327655533	0.290837554251786	0.152258991722976	0.878982667610815	0.970799151783253
2123	PAS_chr2-1_0706	27.3146052882761	-0.0574387691485245	0.378215734710153	-0.151867740755268	0.879291252268452	0.970799151783253
863	PAS_chr1-4_0154	45.9404186083616	-0.0459711940541222	0.308099919650324	-0.149208718088265	0.881388940963157	0.972614057921754
1423	PAS_FragB_0053	47.4008130230765	0.0445491173995914	0.300272942933426	0.148362076730531	0.882057027191376	0.972850339305774
1382	PAS_FragB_0010	25.7989410926068	-0.05725439272996	0.388053161227573	-0.147542652529464	0.882703716236514	0.972887974014835
2089	PAS_chr2-1_0665	35.4227182719209	0.0505265895535119	0.344493943154168	0.146669021495395	0.883393271387739	0.972887974014835
2590	PAS_chr2-2_0087	44.7964615537149	0.0452876028135377	0.308933806124794	0.146593224553883	0.883453101928543	0.972887974014835
671	PAS_chr1-1_0409	66.9190404969226	0.0431190135421309	0.31831340996084	0.135460876585236	0.892247495052716	0.973567404225036
919	PAS_chr1-4_0661	52.1088829522115	0.0445522788625899	0.314311513227215	0.141745615377389	0.887280942818194	0.973567404225036
1064	PAS_chr1-4_0352	314.978960595587	-0.0306421754167396	0.223824358751296	-0.136902773173084	0.891107646802705	0.973567404225036
1318	PAS_chr1-4_0614	33.7792839895152	0.0473107897454342	0.345436096709213	0.136959600331694	0.891062728383933	0.973567404225036
1465	PAS_chr2-1_0036	73.1759273362833	0.0404658288853202	0.289595964726423	0.139732019137586	0.888871726969937	0.973567404225036
2020	PAS_chr2-1_0599	47.0297180785216	-0.0432678688015419	0.309278945640744	-0.139899173258957	0.888739654509454	0.973567404225036
2175	PAS_chr2-1_0755	22.5527051959865	0.0618616374846384	0.431925587524972	0.143222905221057	0.886114140555261	0.973567404225036
2226	PAS_chr2-1_0802	21.9013767897695	0.0568649650738843	0.413716738504033	0.137449031623675	0.890675877148778	0.973567404225036
2288	PAS_chr2-2_0382	113.513514552312	0.0349202065653286	0.24527086988515	0.142374047850363	0.886784560360307	0.973567404225036
2326	PAS_chr2-2_0342	163.610658877793	0.0325197503859724	0.239018612619269	0.136055305608241	0.891777559848014	0.973567404225036
2498	PAS_chr2-2_0178	119.847401889855	-0.0337778859226468	0.240174174306336	-0.140639125835253	0.888155037466236	0.973567404225036
2650	PAS_chr2-2_0034	23.8056832937445	0.0549518782793113	0.399082706639949	0.137695463534301	0.89048110482347	0.973567404225036
3246	PAS_chr3_0603	53.9642073301299	0.0469078989377426	0.324544676598548	0.144534488839471	0.88507842420458	0.973567404225036
3343	PAS_chr3_0704	98.1228417472981	-0.0336276544338794	0.246171215044672	-0.136602707297752	0.891344836450469	0.973567404225036
3366	PAS_chr3_0734	41.2831123564622	0.0447541730141927	0.329808042147517	0.135697640126601	0.892060313371081	0.973567404225036
3413	PAS_chr3_1221	50.5795095643905	0.0445024999931067	0.32159424742664	0.138380895644778	0.889939394816244	0.973567404225036
4114	PAS_chr4_0343	40.9530758832667	0.0499175870032439	0.348400854549521	0.143276304726023	0.886071968833406	0.973567404225036
4596	PAS_chr4_0836	23.517628970155	0.0534065818559582	0.390954246988221	0.136605708385021	0.8913424641671	0.973567404225036
978	PAS_chr1-4_0272	160.887183613878	0.0317095012394305	0.236993913980019	0.133798799753583	0.893561676320228	0.974121411051388
3282	PAS_chr3_0640	97.551671053935	-0.0361061719349044	0.271282896931014	-0.133094169751829	0.894118905990705	0.974121411051388
4390	PAS_chr4_0624	287.894271892839	0.0285203253526814	0.213530438420488	0.13356561979477	0.893746071964434	0.974121411051388
465	PAS_chr1-1_0200	558.624599687314	-0.0283189470595716	0.225395341776417	-0.125641225929429	0.900015927941195	0.974182982408236
557	PAS_chr1-1_0289	27.0142821767581	-0.0492439216503377	0.384581164880933	-0.128045588674588	0.898112895409752	0.974182982408236
689	PAS_chr1-1_0427	22.2949272972572	-0.0488149993124388	0.396548736099432	-0.12309962148057	0.90202821101604	0.974182982408236
952	PAS_chr1-4_0244	60.9582852914713	-0.0334333864685515	0.275646768116753	-0.121290689156168	0.903460794548497	0.974182982408236
1033	PAS_chr1-4_0320	26.8247559337761	0.0456274022434606	0.379005170588145	0.120387281716119	0.904176365846935	0.974182982408236
1056	PAS_chr1-4_0342	22.4775692873591	-0.0485072017873045	0.398487597091155	-0.121728259904181	0.903114231498081	0.974182982408236
1196	PAS_chr1-4_0487	23.7669148213545	-0.0498286728109529	0.401017702755829	-0.124255544003484	0.901112945187953	0.974182982408236
1472	PAS_chr2-1_0043	39.5870416904971	-0.0424621708037424	0.330243657493793	-0.128578308289056	0.897691331288689	0.974182982408236
1876	PAS_chr2-1_0450	86.1145591222602	-0.0306968763050496	0.251611240511604	-0.122001212038991	0.902898058374048	0.974182982408236
1983	PAS_chr2-1_0560	24.4916598528807	0.0529105539075201	0.421948402539743	0.125395791497366	0.900210219717209	0.974182982408236
2071	PAS_chr2-1_0646	261.279297343993	0.0246647165436797	0.201861394201964	0.122186397459449	0.902751398988465	0.974182982408236
2244	PAS_chr2-2_0430	257.469711104684	0.0277649298504005	0.211496971871505	0.131278143628785	0.89555528100327	0.974182982408236
2365	PAS_chr2-2_0302	42.4907880836764	-0.0420345661867305	0.34630848615795	-0.121378966634848	0.903390875886338	0.974182982408236
2453	PAS_chr2-2_0475	66.0758431719045	0.0361069921600745	0.278110567713474	0.129829630196843	0.896701219803484	0.974182982408236
2749	PAS_chr3_0089	43.4796410437238	0.0386823621406352	0.315388570762884	0.122649853947046	0.902384374694302	0.974182982408236
3474	PAS_chr3_0851	42.0212091277861	0.0392975104885599	0.322478803970687	0.12186075489207	0.903009296980546	0.974182982408236
3614	PAS_chr3_0991	22.0122902828991	-0.051766452118423	0.397712330626298	-0.130160541004358	0.896439412655299	0.974182982408236
3798	PAS_chr4_0021	26.1370884511231	0.0511152032715473	0.423976063499424	0.120561530879011	0.904038340429792	0.974182982408236
3819	PAS_chr4_0047	29.7335232220918	0.0468787676774045	0.385143825134986	0.121717562681874	0.903122703649864	0.974182982408236
[truncated: 2,701 more rows]
