# Supplementary material for: Effect of Methionine on Gene Expression in Komagataella phaffii Cells
Source: Microorganisms. 2023 Mar 29;11(4):877. doi: 10.3390/microorganisms11040877 (PMC10143545; doi:10.3390/microorganisms11040877)
Supplement: Supplementary file 1 [file microorganisms-11-00877-s001.zip › Table S4. Differentially expressed genes discussed in this paper.xlsx]

## Sheet: DEG
	Table S4. Differentially expressed genes discussed in the paper
	Gene - the name of the gene as in NCBI database (reference genome of K. phaffii (ASM2700v1))
	baseMean - the average of the normalized count values
	log2FoldChange - the logarithmic value of the expression level change. This value indicates the change between the experimental groups (grown in media with proline) and the control group (grown in media with ammonium sulphate).
	lfcSE - the standard error of the log2FoldChange value
	stat - statistical value of the Wald test (commonly used for hypothesis testing when comparing two groups in DESeq2)
	P value of the Wald test
	P adj value is obtained as the result of Benjamini and Hochberg adjustment method
	Gene name - gene name used in the text of this paper
		genes, discussed in the paper, that are repressed in media with proline in comparison with media with ammonium sulphate (log2FoldChange less than -0.5, P adj value less than 0,05)
		genes, discussed in the paper, that are repressed in media with proline in comparison with media with ammonium sulphate (log2FoldChange less than -0.5, 0,05<P adj value<0,1)
		genes, discussed in the paper, that are activated in media with proline in comparison with media with ammonium sulphate (log2FoldChange greater than 0.5, P adj value less than 0,05)
		genes that does not significantly change expression in media with proline in comparison with media with ammonium sulphate
Gene name	Functional grouping		Function of encoded protein / proposed function	Gene accession number	GeneID	baseMean	log2FoldChange	lfcSE	stat	P value	P adj value
AOX1	MUT (methanol utilization) pathway	Before branchpoint	Alcohol oxidase, isoenzymes	PAS_chr4_0821	8201223	1664.44443248907	-0.807163029176459	0.297944877745893	-2.70910188247928	0.00674656190144873	0.0798778019602465
AOX2				PAS_chr4_0152	8201062	518.304416326751	-3.08025114470705	0.212952144458743	-14.4645227806279	2.03008089561512e-47	4.3504633593032e-44
FLD1		Dissimilative	Formaldehyde dehydrogenase	PAS_chr3_1028	8199772	555.734302768674	-0.476872247396138	0.257343620105466	-1.85305642005309	0.0638742723121103	0.331434783450006
FGH1			S-formylglutathione hydrolase	PAS_chr3_0867	8200354	87.7442380184689	-0.0455451997305826	0.28288548988359	-0.161002247762248	0.872091630280467	0.969853002111901
FDH1			Formate dehydrogenase	PAS_chr3_0932	8200284	2743.01995857197	-0.70481748283804	0.192806719575753	-3.655564932534	0.000256616243114036	0.00689512158875502
DAS1		Assimilative	Dihydroxyacetone synthase, isoenzymes	PAS_chr3_0832	8199663	2681.46520726312	-0.582951342313111	0.193912933113072	-3.00625302786373	0.00264488810124495	0.0422984716490144
DAS2				PAS_chr3_0834	8200324	4730.14956812628	-0.638806498723377	0.181747449097169	-3.51480310671016	0.000440080138918047	0.0107169515647884
DAK1			Dihydroxyacetone kinase	PAS_chr3_0841	8200330	720.899095016689	-0.405327593857431	0.218046643491476	-1.85890315653162	0.0630408666109925	0.328723577990725
TPI1			Triosephosphate isomerase	PAS_chr3_0951	8200302	232.068424933154	-0.657650541466332	0.228522987415307	-2.87783101780981	0.00400419567019164	0.0564538902711887
FBA1			Fructose-1,6-bisphosphate aldolase	PAS_chr1-1_0072	8197200	925.819415103527	0.0876448256709299	0.189748074526988	0.461901001574928	0.644152315732883	0.893730396422699
FBA2			Fructose-1,6-bisphosphate aldolase	PAS_chr1-1_0319	8196585	92.485305777623	-0.184800375407919	0.296067942018271	-0.624182321625738	0.5325078554453	0.851186969820502
FBP1			Fructose-1,6-bisphosphatase	PAS_chr3_0868	8199670	1040.93571357862	0.402492238700785	0.194367130368807	2.07078345982196	0.0383790366155353	0.251276152748392
CAT1	ROS (reactive oxygen species) defense	General ROS defense	Catalase	PAS_chr2-2_0131	8198267	1306.9191128741	-0.259549457029684	0.212888754671852	-1.21917880270264	0.222776335513013	0.602632410930438
SOD1			Superoxide dismutase	PAS_chr4_0786	8200564	1771.78501105813	0.0402126392588082	0.199439425529531	0.201628334779043	0.840207292192459	0.964307792578108
PMP20			Peroxisomal glutathione peroxidase	PAS_chr1-4_0547	8197678	1169.0495851021	-1.22588308301274	0.197584505331551	-6.2043482658505	5.49240358058463e-10	7.76424868159466e-08
KpSUL	Sulfur amino acids metabolism	Sulfur assimilation pathway	High affinity sulfate permease	PAS_chr3_0489	8200226	13.5187278894826	-0.670625289167028	0.534827083561036	-1.25391048766979	0.20987454260438	NA
KpMET3			ATP sulfurylas	PAS_chr2-2_0119	8198449	26.0438465346248	0.136389164732083	0.426205468893359	0.320008011831047	0.748962257104071	0.931529957616962
KpMET14			Adenylylsulfate kinase	PAS_chr3_0667	8200367	54.1913560605579	-1.18219146208504	0.315352886084562	-3.74878910024636	0.000177690427942563	0.00528875815390156
KpMET16			3'-phosphoadenylsulfate reductase
KpMET5			Sulfite reductase beta subunit	PAS_chr3_1084	8200044	284.340486323361	-1.85189012623835	0.225924652600515	-8.19693692088093	2.46589757876387e-16	8.80736418548497e-14
KpMET10			Subunit alpha of assimilatory sulfite reductase	PAS_chr4_0369	8200983	70.3536641917978	-2.31058793377261	0.308715601919449	-7.48451947166406	7.18093875648226e-14	1.70986130612683e-11
KpMET25 (KpMET17)			bifunctional cysteine synthase	PAS_chr4_0330	8200771	46.9169921595488	-0.924148269076688	0.307717080210814	-3.00324008158261	0.00267121613950794	0.0424030828664112
KpHOM3		Methionine and cysteine carbon chain biosynthesis	Aspartate kinase	PAS_chr4_0150	8201060	21.0947874979656	0.698819666554827	0.447695156562112	1.56092746662957	0.118540865803767	0.4504132542863
KpHOM2			Aspartic beta semi-aldehyde dehydrogenase	PAS_chr3_0471	8199599	44.7810663231421	0.622797702354445	0.329392842428051	1.89074449148203	0.0586584601942733	0.317437071202847
KpHOM6			Homoserine dehydrogenase	PAS_chr1-4_0049	8197269	13.304330842446	0.0981436562260212	0.566413263656126	0.173272171616385	0.862437496650594	NA
KpMET6			Cobalamin-independent methionine synthase	PAS_chr2-1_0160	8198543	42.0576164447495	-0.474536094699711	0.323310701626008	-1.46774014071651	0.142174822730473	0.496963162565798
KpMET2			L-homoserine-O-acetyltransferase	PAS_chr2-1_0383	8199071	6.8524745190568	-1.66547032191307	0.734994292783391	-2.26596361123569	0.0234536113083933	NA
KpCYS3			Cystathionine gamma-lyase	PAS_chr1-4_0489	8197076	124.869980808471	-1.27270703809759	0.285108642556134	-4.46393706864572	8.04672073888958e-06	0.000366896224328518
KpCYS4			Cystathionine beta-synthase	PAS_chr2-2_0137	8198715	118.170818457	-0.43256986587849	0.25381982685479	-1.70423985879544	0.0883362855137709	0.387919384950842
KpSAM1		SAM cycle	S-adenosylmethionine synthetase	PAS_chr3_0876	8200232	2.79113628108632	0.512338882258133	1.0315161593894	0.496685270118706	0.619411011306409	NA
KpSAH1			S-adenosyl-L-homocysteine hydrolase	PAS_chr3_0890	8200245	14.0503129483911	-0.0539927411350308	0.539952366734735	-0.0999953782248279	0.920347994697647	NA
KpACC1	Fatty acids methabolism	Biosynthesis	Acetyl-CoA carboxylase	PAS_chr1-4_0249	8196923	137.397778437913	-0.855344405480135	0.245117925304194	-3.48952205114597	0.000483885133976159	0.0113952290341858
KpFAS1			Beta subunit of fatty acid synthetase	PAS_chr1-1_0008	8197525	123.954660363073	-1.09663922564408	0.246763071513625	-4.44409780976294	8.82614474777363e-06	0.000394050587384977
KpFAS2			Alpha subunit of fatty acid synthetase;	PAS_chr1-4_0295	8197745	210.65820607221	-1.34599626579622	0.241536927615087	-5.57263139465449	2.50920109908778e-08	2.56057997873577e-06
KpFAA1			Long chain fatty acyl-CoA synthetase	PAS_chr2-1_0785	8198062	176.879937034255	-1.18801489850943	0.226937137112077	-5.23499553060241	1.6498885603478e-07	1.30952266104642e-05
KpELO		Elongation	Elongase	PAS_chr3_0236	8199985	69.0409294362285	1.1461708542147	0.292631259596134	3.91677517909929	8.97413672245324e-05	0.00305263095178052
KpPOX1		Beta-oxidation	Fatty-acyl coenzyme A oxidase	PAS_chr1-4_0538	8197432	101.808739512696	0.889410491773751	0.243355286051524	3.65478188785036	0.000257400712599347	0.00689512158875502
KpFOX2			3-hydroxyacyl-CoA dehydrogenase and enoyl-CoA hydratase	PAS_chr2-1_0776	8198053	33.0150386397899	0.196744737540689	0.363776669008504	0.540839350904304	0.58861831705783	0.874617344373842
KpPOT1			3-ketoacyl-CoA thiolase with broad chain length specificity	PAS_chr2-2_0267	8198672	41.4591201327812	0.834608885966303	0.351124985825567	2.37695669536011	0.0174561373393844	0.147277568182287
