# Supplementary material for: Effect of Methionine on Gene Expression in Komagataella phaffii Cells
Source: Microorganisms. 2023 Mar 29;11(4):877. doi: 10.3390/microorganisms11040877 (PMC10143545; doi:10.3390/microorganisms11040877)
Supplement: Supplementary file 1 [file microorganisms-11-00877-s001.zip › Table S5. Analysis of ACP specific activity of K. phaffii PAP1-X33 strain carrying reporter gene PHO1 under control of AOX1 promoter.xlsx]

## Sheet: Лист1
	Table S5. Analysis of ACP specific activity of K. phaffii PAP1-X33 strain carrying reporter gene PHO1 under control of AOX1 promoter
	With methionine (BMM+Met)					Without methionine (BMM)
	Probes					Probes
Cell density OD 600, dilution x 10	1	2	3	4		1	2	3	4
measurement 1	0.285	0.306	0.316	0.274		0.312	0.308	0.318	0.301
measurement 2	0.286	0.305	0.317	0.279		0.325	0.321	0.318	0.298
Mean for 2 measurements	0.2855	0.3055	0.3165	0.2765		0.3185	0.3145	0.318	0.2995
ACP activity, OD 410, dilution x 50	1	2	3	4		1	2	3	4
measurement 1	0.251	0.229	0.267	0.262		0.607	0.616	0.792	0.685
measurement 2	0.261	0.224	0.266	0.264		0.622	0.65	0.756	0.795
Mean for 2 measurements	0.256	0.2265	0.2665	0.263		0.6145	0.633	0.774	0.74
					Mean					Mean
ACP specific activity	4.48336	3.70704	4.21011	4.75588	4.2891	9.64678	10.0636	12.1698	12.3539	11.0585
